# Supplementary material for: Synthesis of trifluoroethoxy/aryloxy cinnolines, cinnolinones and indazoles from o-alkynylanilines via metal-free diazotization reagent
Source: Royal Society of Chemistry journal article supplement (doi:10.1039/d4ob00058g), 2024-01-01
Supplement: d4ob00058g1.pdf [file d4ob00058g1.pdf]

**Synthesis of Trifluoroethoxy/Aryloxy Cinnolines,  
Cinnolinones and Indazoles from *o*-Alkynylanilines via Metal-  
Free Diazotization Reagent**

Madan Kumar,<sup>a</sup> and Avijit Goswami<sup>a\*</sup>

<sup>a</sup>Department of Chemistry, SS Bhatnagar Block, Main Campus, Indian Institute of  
Technology Ropar, Rupnagar, Punjab-140001, India;  
E-mail: [agoswami@iitrpr.ac.in](mailto:agoswami@iitrpr.ac.in)

# Table of Contents

|                                                                             | <i>Page No.</i> |
|-----------------------------------------------------------------------------|-----------------|
| 1. General information                                                      | S2              |
| 2. Experimental procedures                                                  | S2-S6           |
| 3. Copies of $^1\text{H}$ , $^{19}\text{F}$ and $^{13}\text{C}$ NMR spectra | S7-S72          |
| 4. X-ray crystallographic data                                              | S73-S83         |
| 5. References                                                               | S84             |

## **1. General information:**

All the reactions were carried out under an inert atmosphere using the schlenk technique unless stated. All solvents were dried and stored over molecular sieves under argon atmosphere. All chemicals and reagents were purchased from commercial suppliers and used without further purification. Thin-layer chromatography (TLC) was performed using pre-coated plates purchased from E. Merck (silica gel 60 PF254, 0.25 mm). Column chromatography was performed using E. Merck silica gel 60 (100–200 mesh).  $^1\text{H}$ ,  $^{13}\text{C}\{^1\text{H}\}$  NMR spectra were recorded either in  $\text{DMSO-}d_6$  or in  $\text{CDCl}_3$ , on JEOL JNM-ECS spectrometer at operating frequencies of 400 MHz ( $^1\text{H}$ ) or 101 MHz ( $^{13}\text{C}\{^1\text{H}\}$ ) as indicated in the individual spectrum. Chemical shifts ( $\delta$ ) are given in parts per million (ppm) relative to residual solvent (For  $^1\text{H}$ :  $\text{DMSO-}d_6$ ,  $\delta= 2.50$ ;  $\text{CDCl}_3$ ,  $\delta= 7.26$ ; for  $^{13}\text{C}\{^1\text{H}\}$ :  $\text{DMSO-}d_6$ ,  $\delta= 39.52$ ;  $\text{CDCl}_3$ ,  $\delta= 77.16$ ) and coupling constants ( $J$ ) in Hz. Multiplicity is tabulated as s for singlet, d for doublet, dd for doublet of doublet, t for triplet, q for quartet, and m for multiplet. High-resolution mass spectra (HRMS) were recorded using electron spray ionization (ESI) methods on waters mass spectrometer (XEVO G2-XS QTOF). Melting points were taken on the Stuart digital melting point apparatus and X-ray data were recorded on a Bruker D8 venture instrument.

## **2. Experimental procedures:**

### **2.1. Synthesis of known alkynylanilines (1):**

All the alkynylanilines **1a–1z**, and diynedianilines **1a'–1b'** were synthesized according to our previous reported work and reference cited therein.<sup>1</sup>

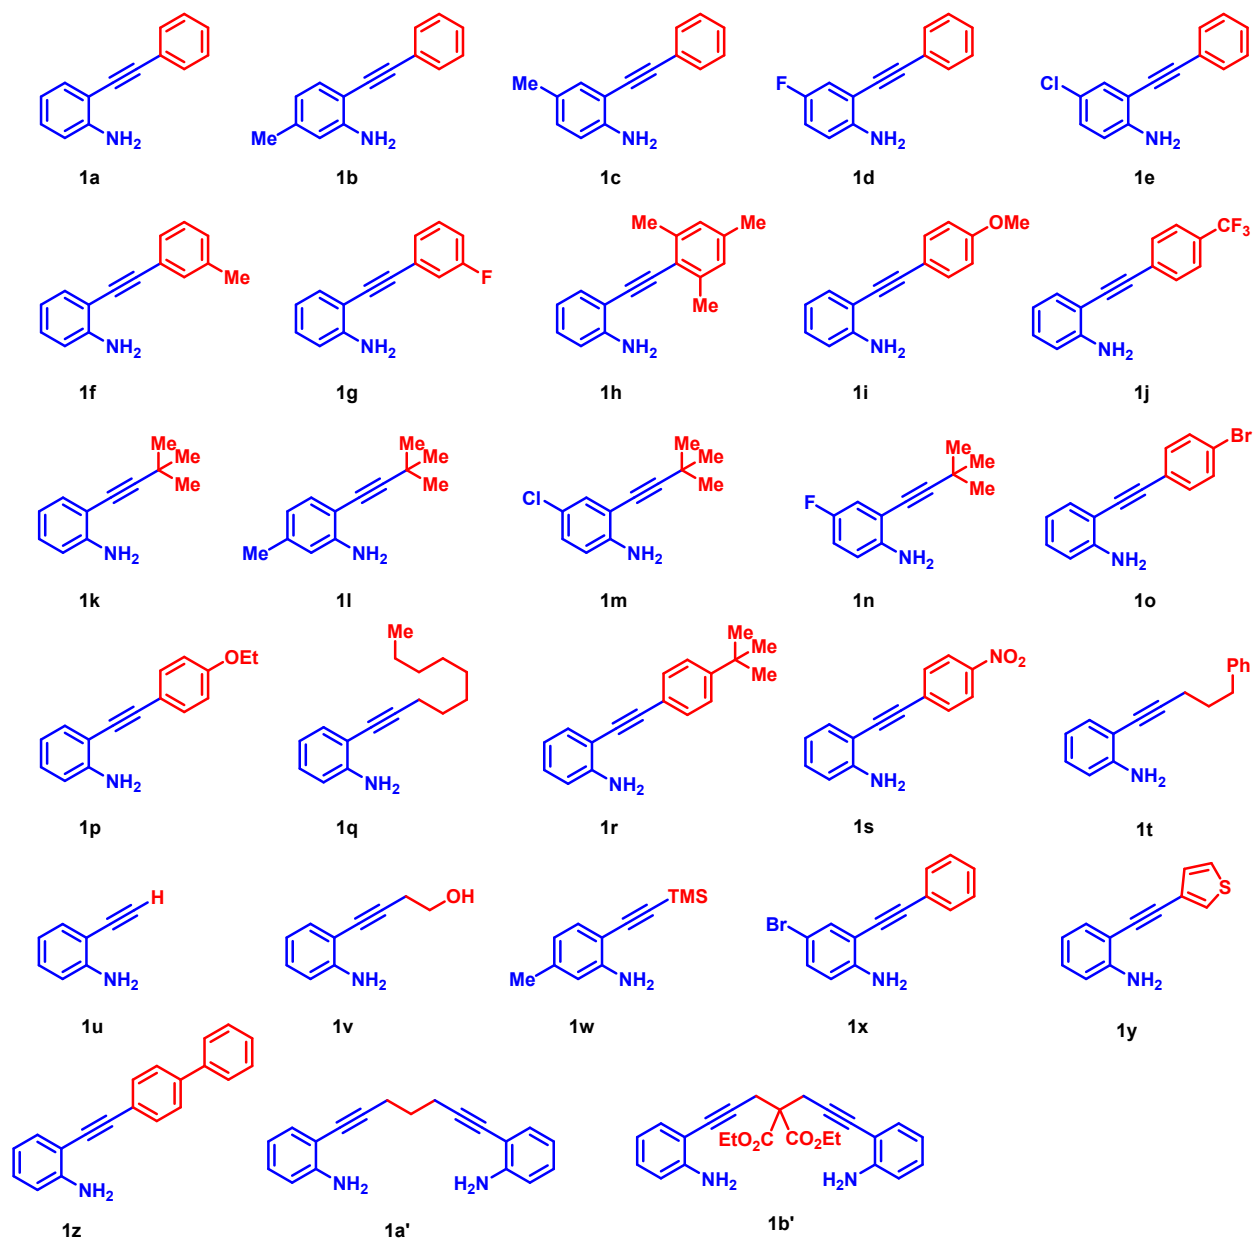

**Figure 1.** List of alkynylanilines derivatives **1**

## 2.2. General procedure for the synthesis of trifluoroethoxy cinnolines (**3**):

In a schlenk tube, *o*-alkynylaniline **1** (0.3 mmol, 1 equiv) was dissolved in 1.5 mL TFE under N<sub>2</sub> atmosphere. The reaction mixture was stirred and at first BF<sub>3</sub>·OEt<sub>2</sub> (2 equiv) was added followed by addition of TBN (2 equiv) in a dropwise manner at room temperature. After addition, reaction mixture was placed to pre-heated oil-bath of temperature at 70 °C. On completion of reaction as monitored by TLC, the crude mixture was cooled to room temperature, H<sub>2</sub>O was added and extracted the organic layer thrice with EtOAc. The combined organic layer was once washed with brine, dried over anhydrous Na<sub>2</sub>SO<sub>4</sub>, filtered

and concentrated under reduced pressure. The collected crude product was purified through column chromatography over silica-gel (*n*-hexane:EtOAc = 10:1).

### 2.3. General procedure for the synthesis of aryloxy cinnolines (5):

In a schlenk tube, appropriate *o*-alkynylaniline 1 (0.3 mmol, 1 equiv) and aromatic alcohol 4 1.5 ml were dissolved in 0.5 mL DCE subsequently under N<sub>2</sub> atmosphere. The reaction mixture was stirred and BF<sub>3</sub>·OEt<sub>2</sub> (2 equiv) was added followed by TBN (2 equiv) in a dropwise manner at room temperature. After addition, reaction mixture was placed to pre-heated oil-bath of temperature at 70 °C. On completion of reaction as monitored by TLC, crude mixture was cooled to room temperature, added 30-40 ml saturated NaOH and extracted the organic layer thrice with DCM. The combined organic layer was once washed with brine, dried over anhydrous Na<sub>2</sub>SO<sub>4</sub>, filtered and concentrated under reduced pressure. The collected crude product was purified through column chromatography over silica-gel (*n*-hexane:EtOAc = 10:1).

### 2.4. General procedure for the synthesis of cinnolin-4(1*H*)-one (6):

In a schlenk tube, suitable *o*-alkynylaniline 1 (0.3 mmol, 1 equiv) was dissolved in 1.0 mL AcOH under N<sub>2</sub> atmosphere. The reaction mixture was stirred and BF<sub>3</sub>·OEt<sub>2</sub> (2 equiv) was added followed by TBN (2 equiv) in a dropwise manner at room temperature. After addition, reaction mixture was placed to pre-heated oil-bath of temperature at 70 °C. On completion of reaction as monitored by TLC, the crude mixture was cooled to room temperature, quenched with saturated NaHCO<sub>3</sub> and extracted the organic layer thrice with EtOAc. The combined organic layer was once washed with brine, dried over anhydrous Na<sub>2</sub>SO<sub>4</sub>, filtered and concentrated under reduced pressure. The collected crude product was purified through column chromatography over silica-gel (*n*-hexane:EtOAc = 10:1).

### 2.5. General procedure for the synthesis of (1*H*-indazol-3-yl)methanone (7):

In a schlenk tube, appropriate *o*-alkynylaniline 1 (0.3 mmol, 1 equiv) was dissolved in 1.0 mL DMF under N<sub>2</sub> atmosphere. The reaction mixture was stirred and BF<sub>3</sub>·OEt<sub>2</sub> (2 equiv) was added followed by TBN (2 equiv) in a dropwise manner at room temperature. After addition, reaction mixture was placed to pre-heated oil-bath of temperature at 70 °C. On completion of reaction as monitored by TLC, crude mixture was cooled to room temperature, added ice-cold water and extracted the organic layer thrice with EtOAc. The combined organic layer was again washed with ice-cold water and brine, dried over anhydrous Na<sub>2</sub>SO<sub>4</sub>, filtered and concentrated under reduced pressure. The collected crude product was purified through column chromatography over silica-gel (*n*-hexane:EtOAc = 100:5).

### 2.6. Gram scale synthesis of 6a:

In a schlenk RBF, alkynylaniline 1a (5 mmol, 1 equiv) was dissolved in 12 mL AcOH under N<sub>2</sub> atmosphere. The reaction mixture was stirred and added BF<sub>3</sub>·OEt<sub>2</sub> (2 equiv) followed by

TBN (2 equiv) in a dropwise manner at room temperature. After addition, reaction mixture was shifted to pre-heated oil-bath of temperature 70 °C. On completion of reaction as monitored by TLC, crude mixture was cooled to room temperature, quenched with saturated NaHCO<sub>3</sub> and extracted the organic layer thrice with EtOAc. The combined organic layer was once washed with brine, dried over anhydrous Na<sub>2</sub>SO<sub>4</sub>, filtered and concentrated under reduced pressure. The collected crude was purified through column chromatography over silica-gel (*n*-hexane:EtOAc = 10:1).

## 2.7. General procedure for the synthesis of bis(cinnolin-4(1*H*))-one (8a & 8b):

In a schlenk tube, alkynylaniline 1a' or 1b' (0.3 mmol, 1 equiv), was dissolved in 1 mL AcOH under N<sub>2</sub> atmosphere. The reaction mixture was stirred and BF<sub>3</sub>·OEt<sub>2</sub> (5 equiv) was added followed by TBN (5 equiv) in a dropwise manner at room temperature. After addition, reaction mixture was placed to pre-heated oil-bath of temperature at 70 °C. On completion of reaction as monitored by TLC, the crude mixture was cooled to room temperature, quenched with saturated NaHCO<sub>3</sub> and extracted the organic layer thrice with EtOAc. The combined organic layer was once washed with brine, dried over anhydrous Na<sub>2</sub>SO<sub>4</sub>, filtered and concentrated under reduced pressure. The collected crude product was purified through column chromatography over silica-gel (*n*-hexane:EtOAc = 10:8).

## 2.8. Synthesis of product 10:

At 0.1 mmol scale, iodo derivative of aryloxy cinnoline 5l (1 equiv), CuI (0.02 equiv), PdCl<sub>2</sub>(PPh<sub>3</sub>)<sub>2</sub> (0.01 equiv), and Et<sub>3</sub>N (1 ml) were added subsequently under N<sub>2</sub> atm. in a schlenk tube. After stirring of reaction mixture at room temperature for 2 minutes, ethynyl trimethylsilane 9 (1.1 equiv) was added dropwise. The reaction was allowed to run for 8 h and after completion (monitored by TLC analysis) crude product was dissolved in EtOAc and filtered through small celite pad. The collected solution was concentrated under reduced pressure and performed column chromatography over silica gel (*n*-hexane:EtOAc = 10:1).

## 2.9. General procedure for the synthesis of *N*-propargylated cinnolinones 12a/12b:

In a 50 ml round-bottom flask, 6a/6l (0.2 mmol, 1 equiv) was dissolved in 15 ml ACN. After adding, propargyl bromide 11 (1.5 equiv) and K<sub>2</sub>CO<sub>3</sub> (3 equiv) subsequently reaction was stirred on pre-heated oil bath of temperature 80 °C for 8 h. After completion of reaction, as monitored by TLC, reaction was allowed to come to room temperature, added H<sub>2</sub>O and extracted the organic layer thrice with EtOAc. The combined organic layer was once washed with brine, dried over anhydrous Na<sub>2</sub>SO<sub>4</sub>, filtered and concentrated under reduced pressure. The collected crude product was purified through column chromatography over silica-gel (*n*-hexane:EtOAc = 10:1).

## 2.10. Synthesis of *N*-boc protected indazole 14:

In a 10 ml round bottom flask, charged with 0.1 mmol, 1 equiv of **7g** was added THF (2 ml) at room temperature. Subsequently, (Boc)<sub>2</sub>O (1.2 equiv) and DMAP (5 mol%) was added under stirring condition at room temperature. After completion of reaction, as monitored by TLC analysis crude mixture was diluted with H<sub>2</sub>O and extracted thrice with DCM. Then the combined organic layer was once washed with brine, dried over Na<sub>2</sub>SO<sub>4</sub>, and concentrated under reduced pressure. The collected crude fraction was further purified through column chromatography over silica-gel (*n*-hexane:EtOAc = 100:1).

#### **2.10. Synthesis of *N*-boc protected cinnolinones 15-17:**

In a 10 ml round bottom flask, charged with 0.1 mmol, 1 equiv of **3j-3l/6m-6o** mixture was added THF (2 ml) at room temperature. Subsequently, (Boc)<sub>2</sub>O (1.2 equiv) and DMAP (5 mol%) was added under stirring condition at room temperature. After completion of reaction, as monitored by TLC analysis crude mixture was diluted with H<sub>2</sub>O and extracted thrice with DCM. Then the combined organic layer was once washed with brine, dried over Na<sub>2</sub>SO<sub>4</sub>, and concentrated under reduced pressure. The collected crude fraction was further purified through column chromatography over silica-gel (*n*-hexane:EtOAc = 100:1).

**S4. Copies of  $^1\text{H}$ ,  $^{13}\text{C}$ , &  $^{19}\text{F}$ , NMR spectra**



$^1\text{H}$ ,  $^{13}\text{C}\{^1\text{H}\}$  and  $^{19}\text{F}$  NMR ( $\text{CDCl}_3$ , 400, 101 and 376 MHz) of compound 3a:

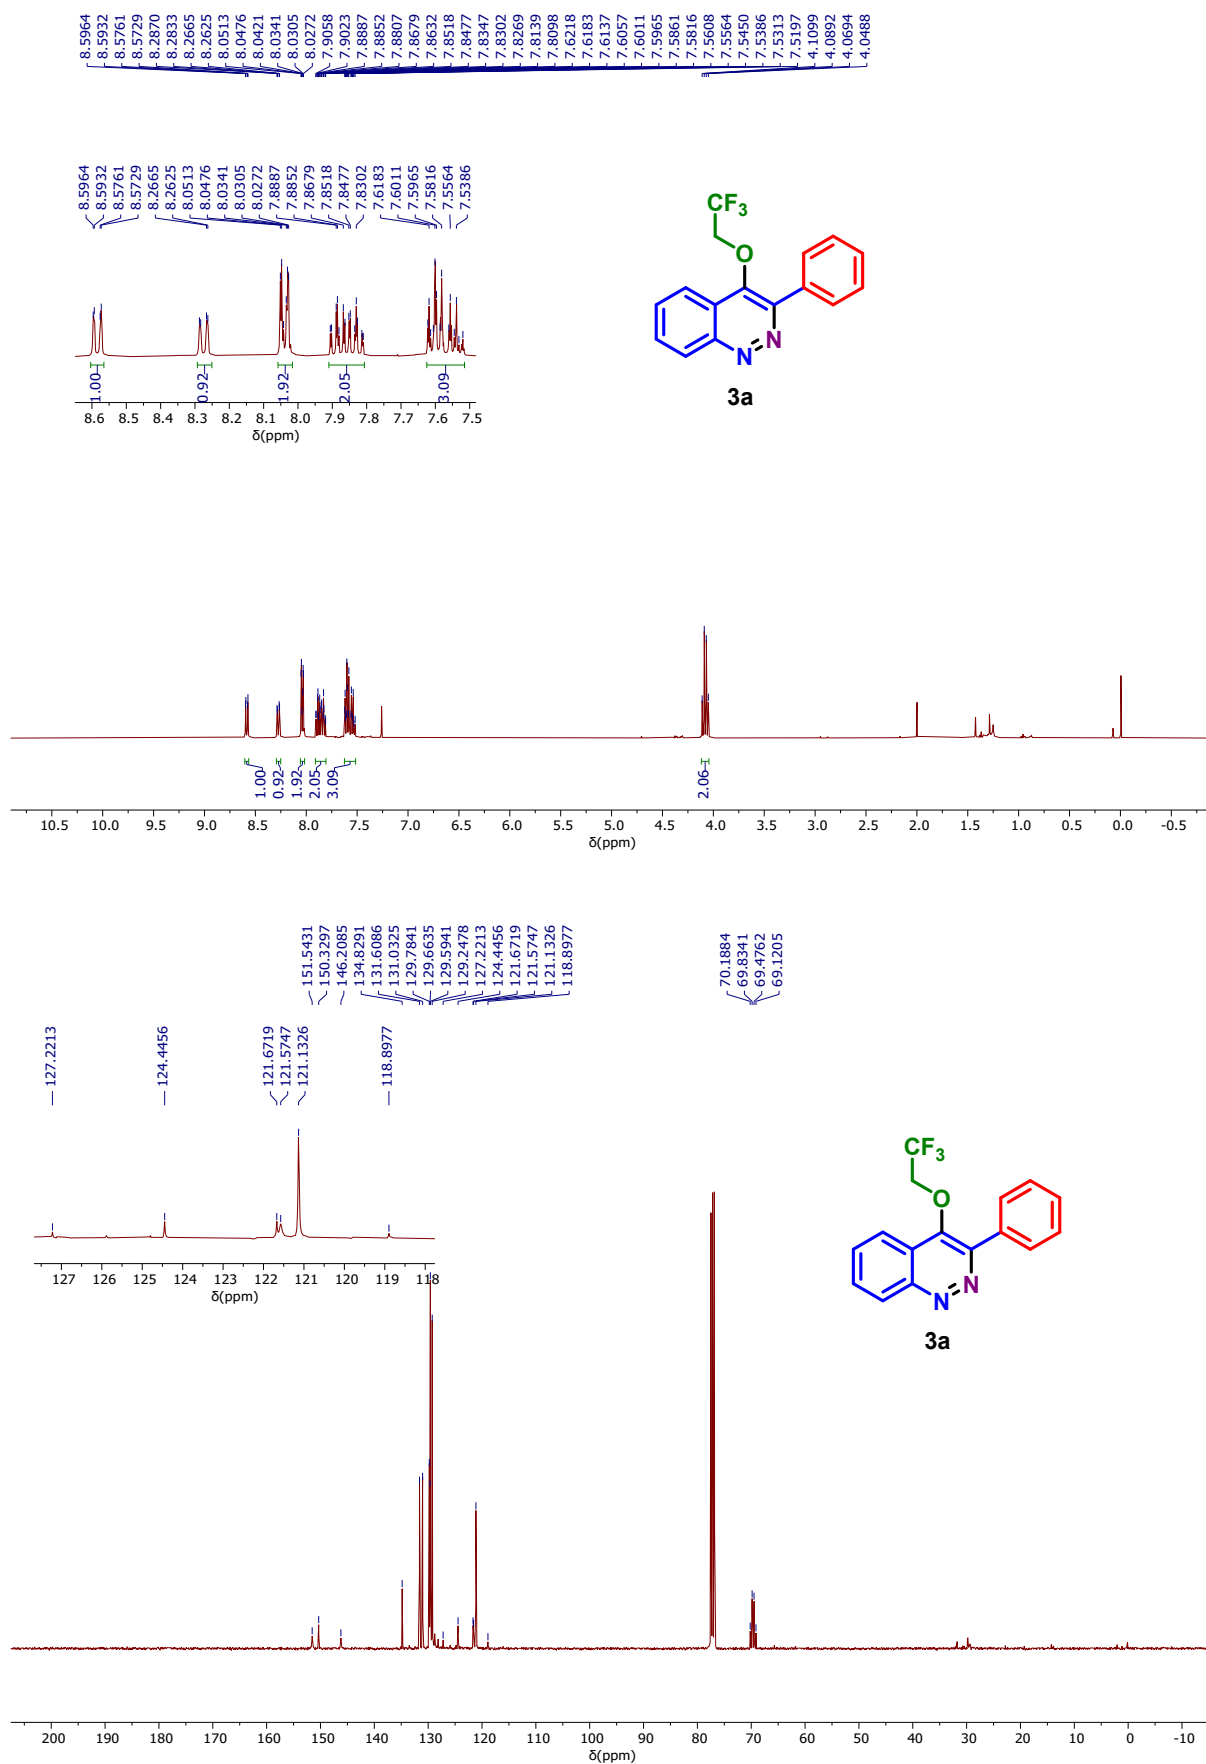

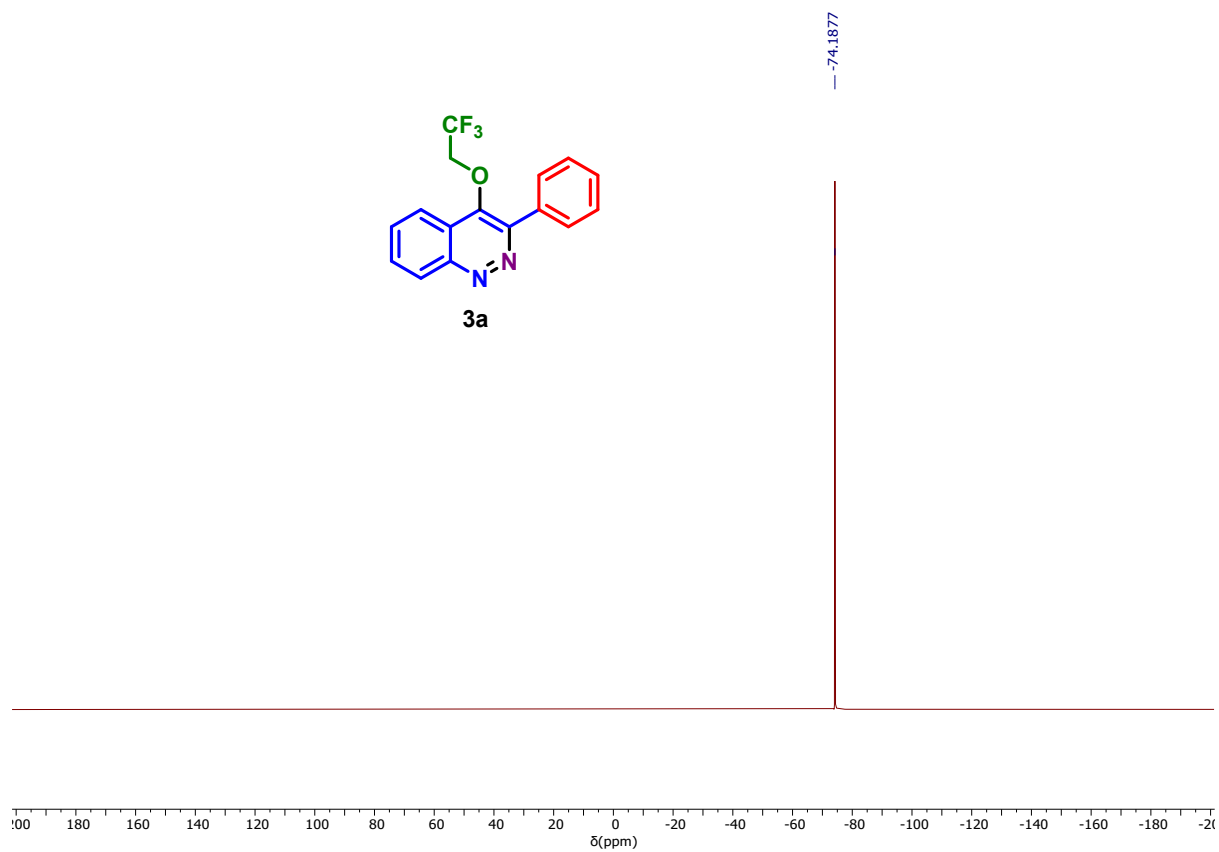

$^1\text{H}$ ,  $^{13}\text{C}\{^1\text{H}\}$  and  $^{19}\text{F}$  NMR ( $\text{CDCl}_3$ , 400, 101 and 376 MHz) of compound **3b**:

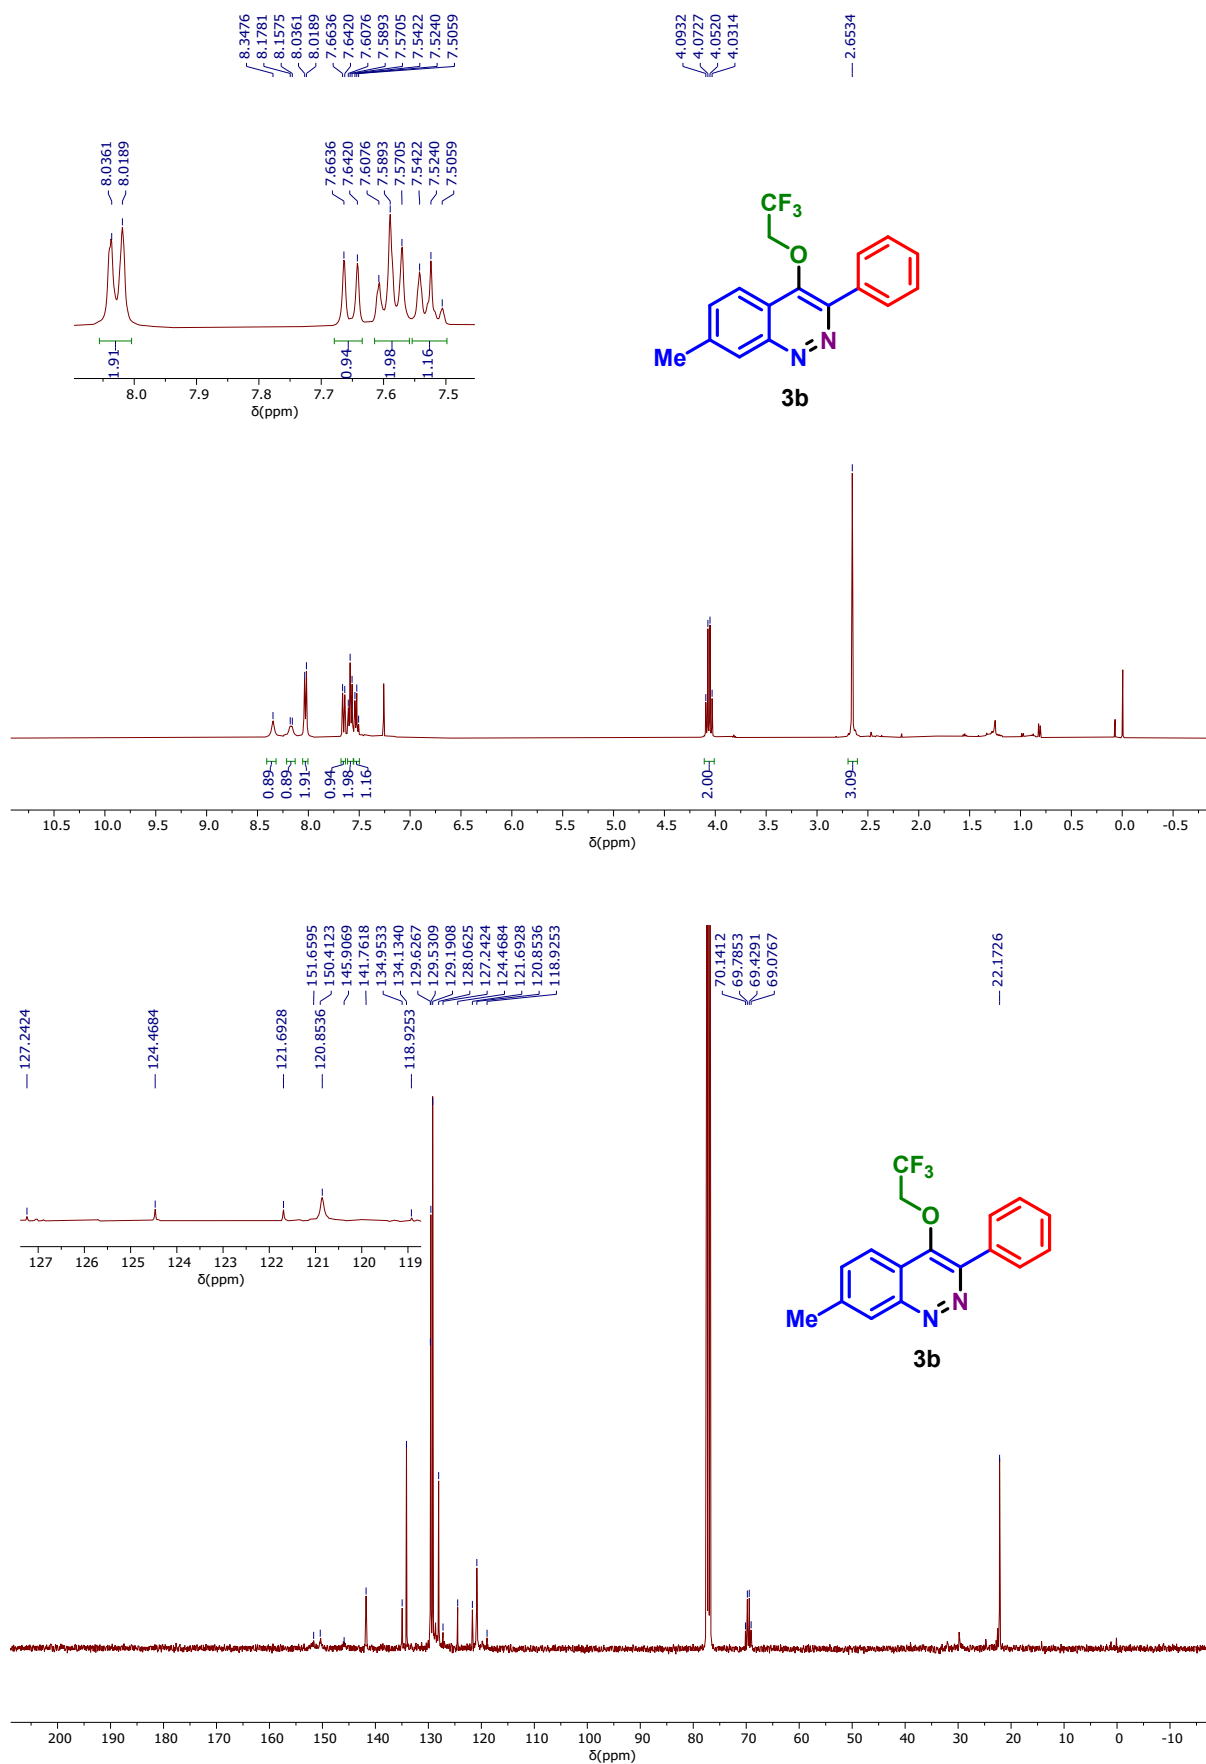

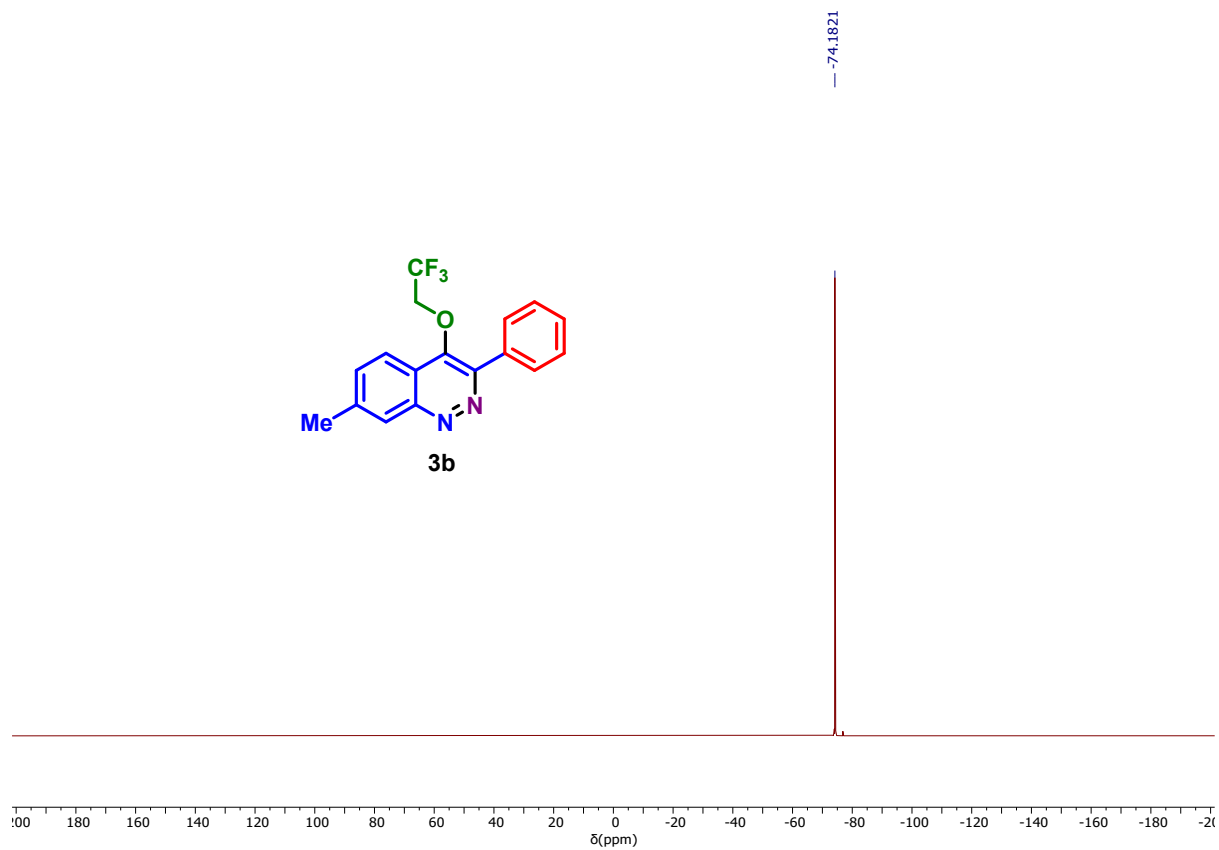

$^1\text{H}$ ,  $^{13}\text{C}\{^1\text{H}\}$  and  $^{19}\text{F}$  NMR ( $\text{CDCl}_3$ , 400, 101 and 376 MHz) of compound **3c**:

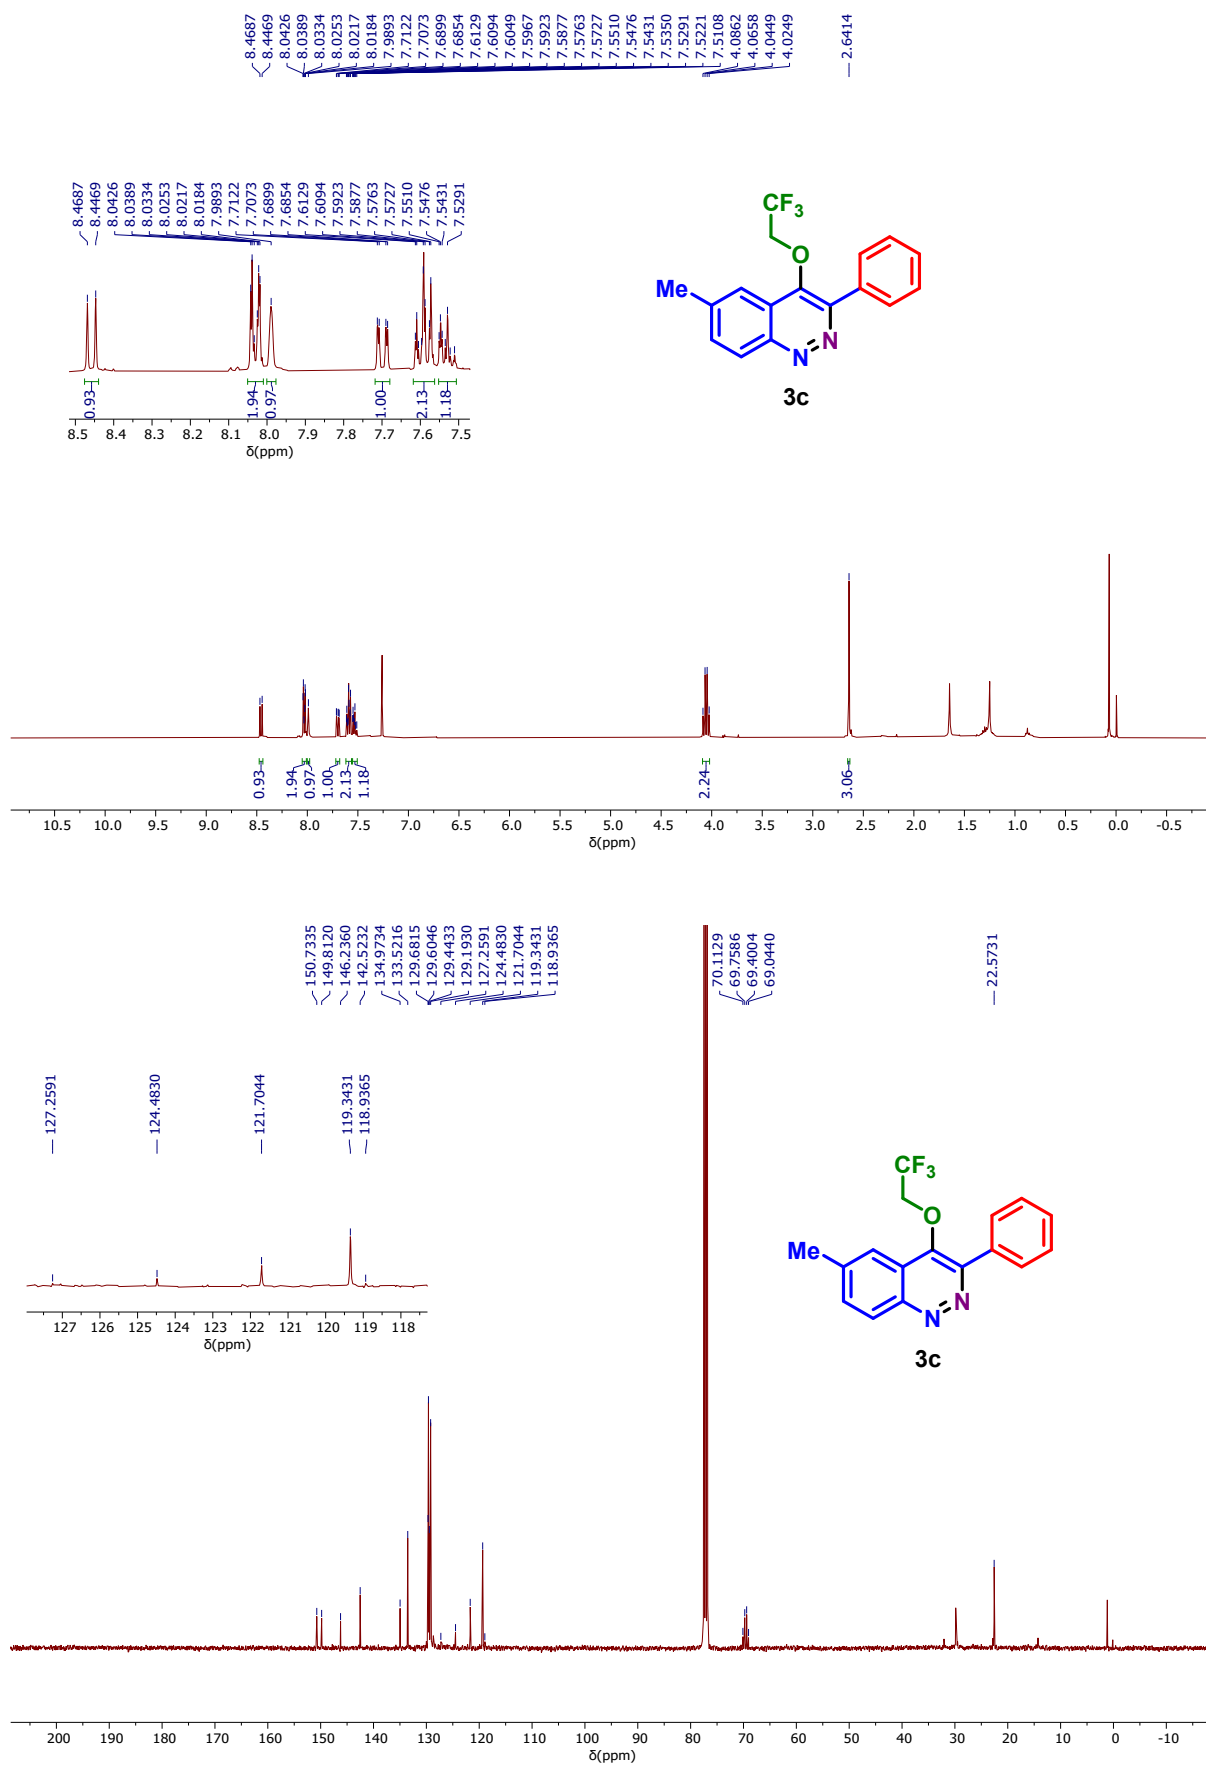

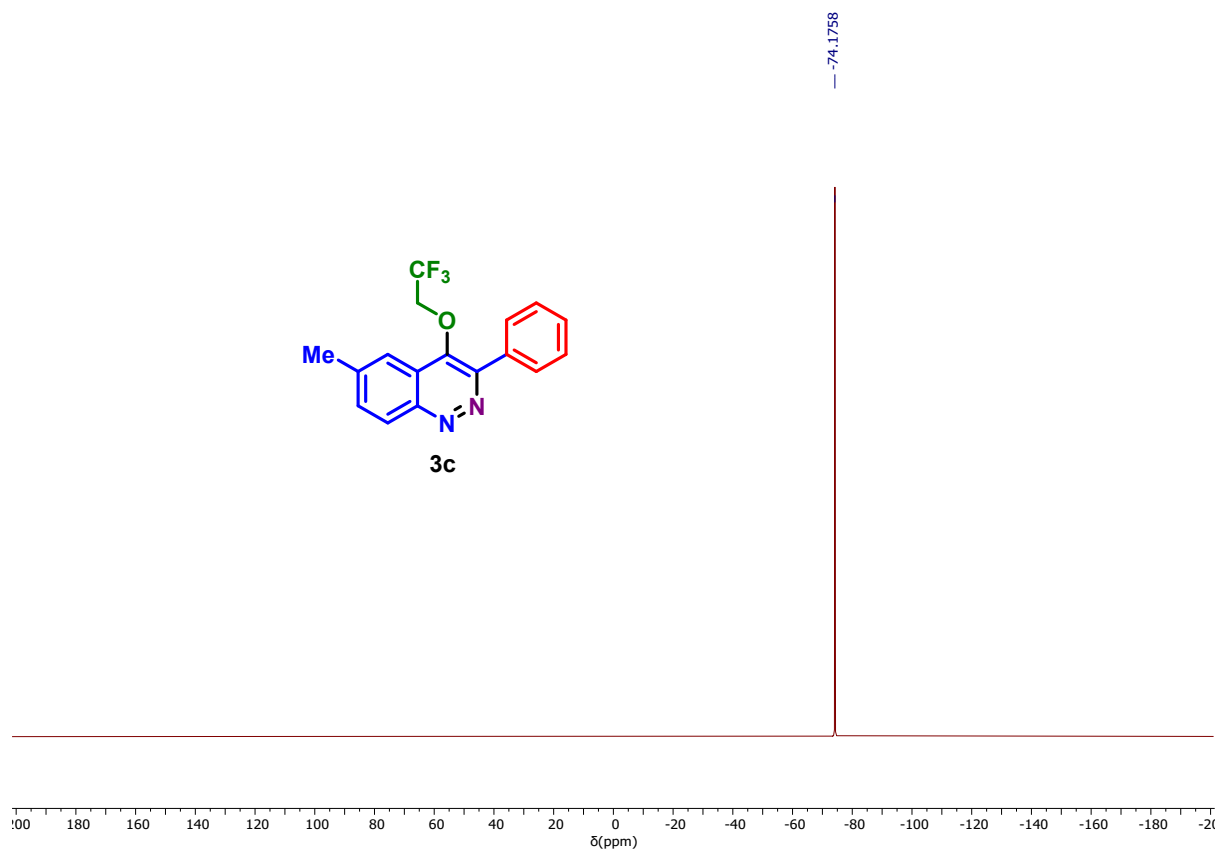

$^1\text{H}$ ,  $^{13}\text{C}\{^1\text{H}\}$  and  $^{19}\text{F}$  NMR ( $\text{CDCl}_3$ , 400, 101 and 376 MHz) of compound **3d**:

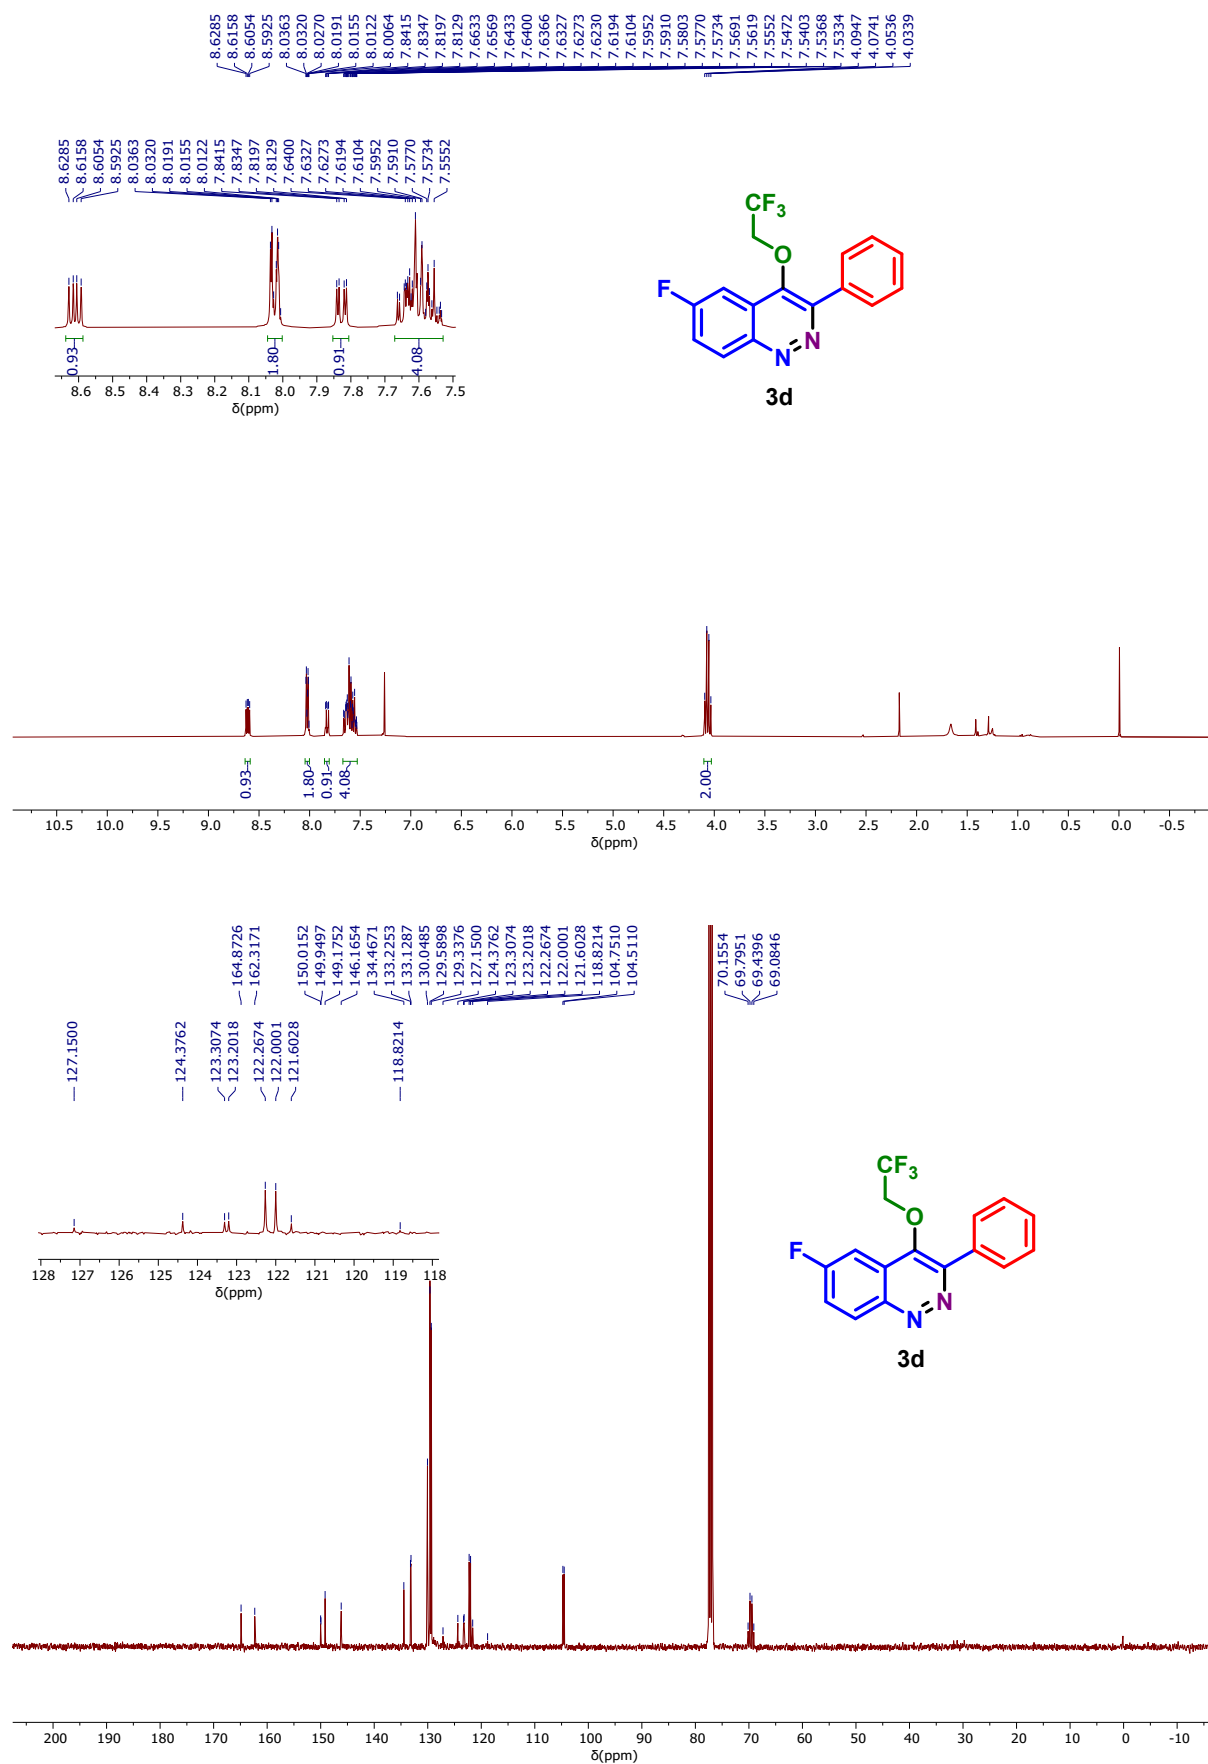

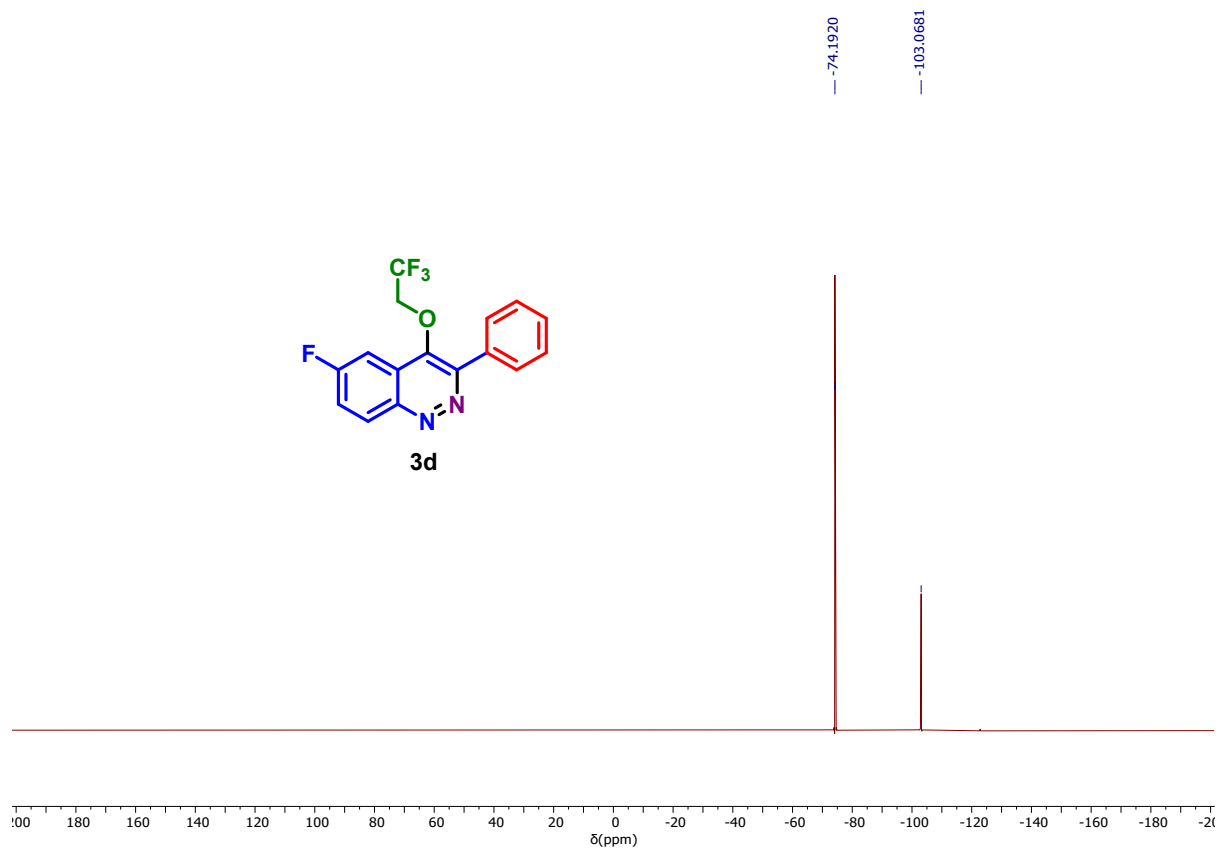



$^1\text{H}$ ,  $^{13}\text{C}\{^1\text{H}\}$  and  $^{19}\text{F}$  NMR ( $\text{CDCl}_3$ , 400, 101 and 376 MHz) of compound **3e**:

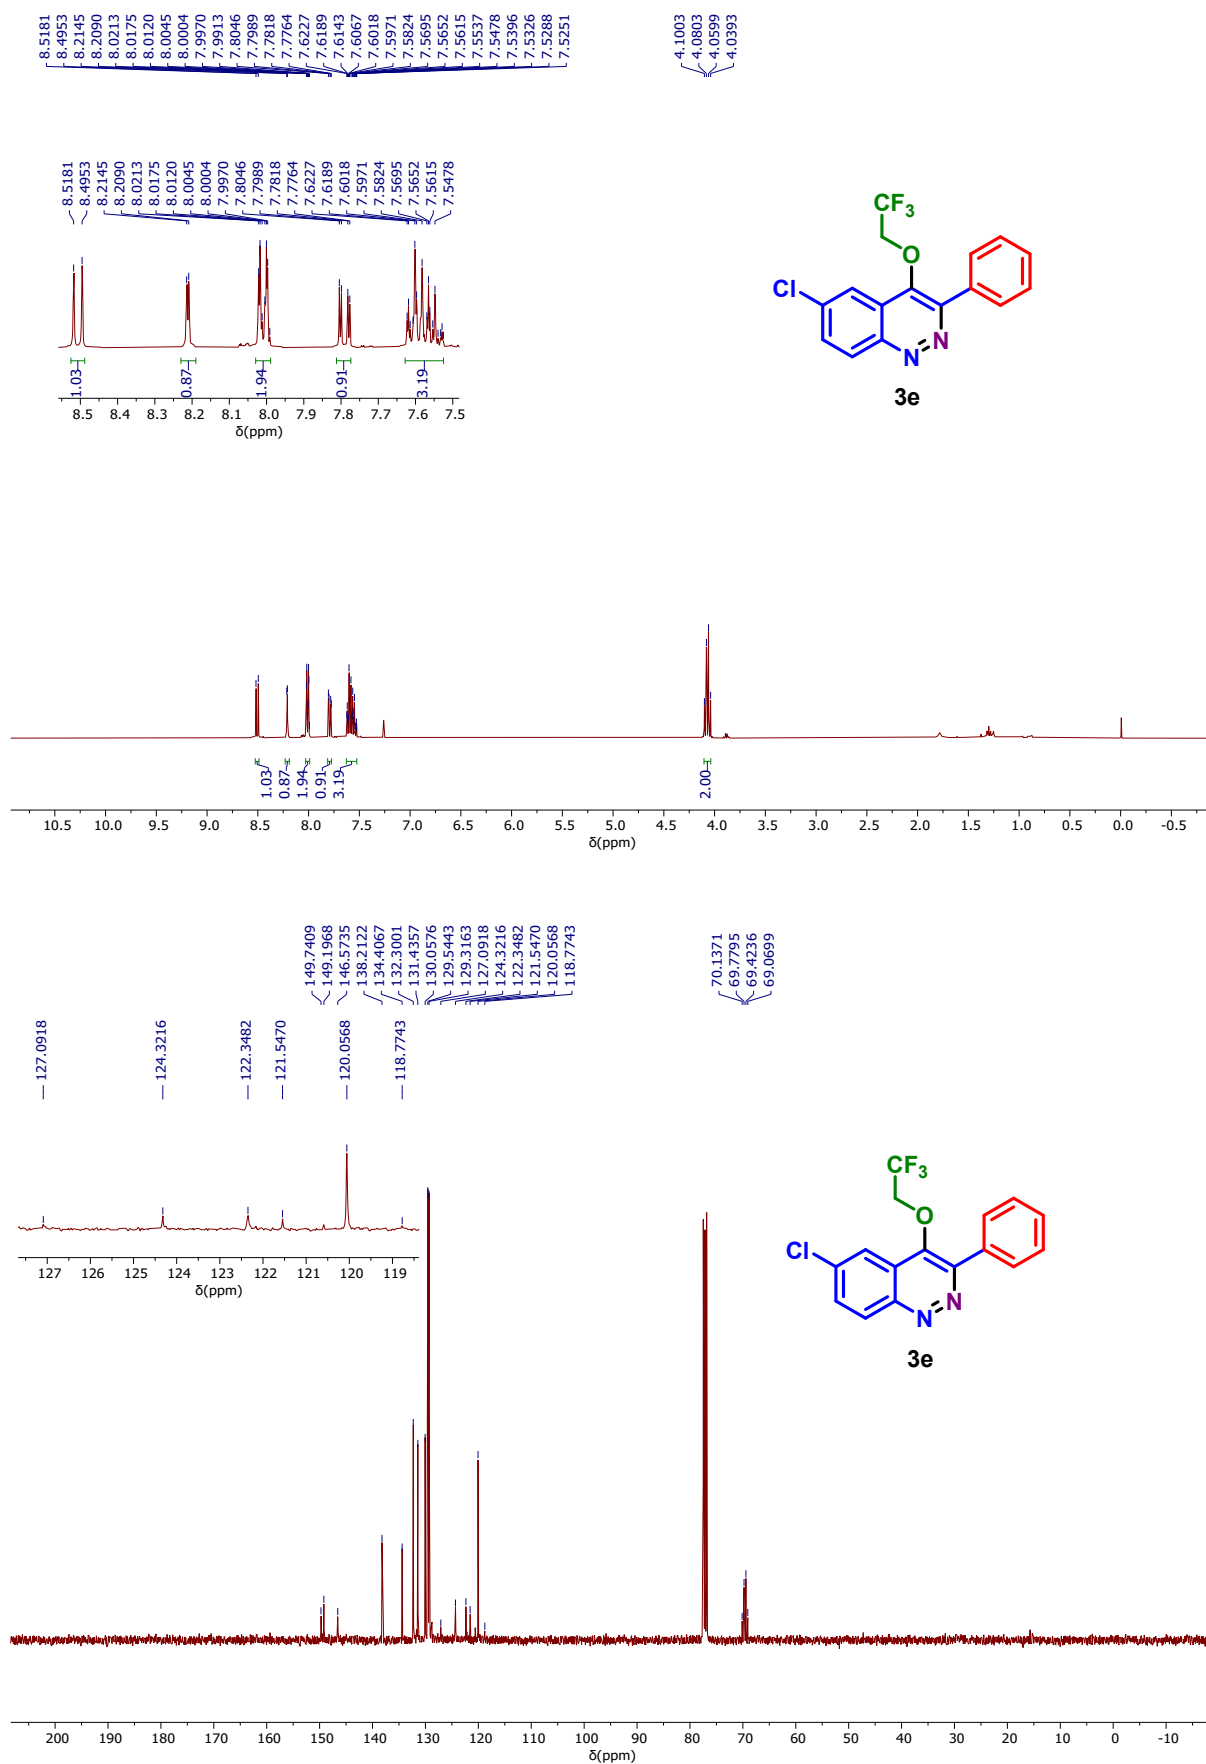

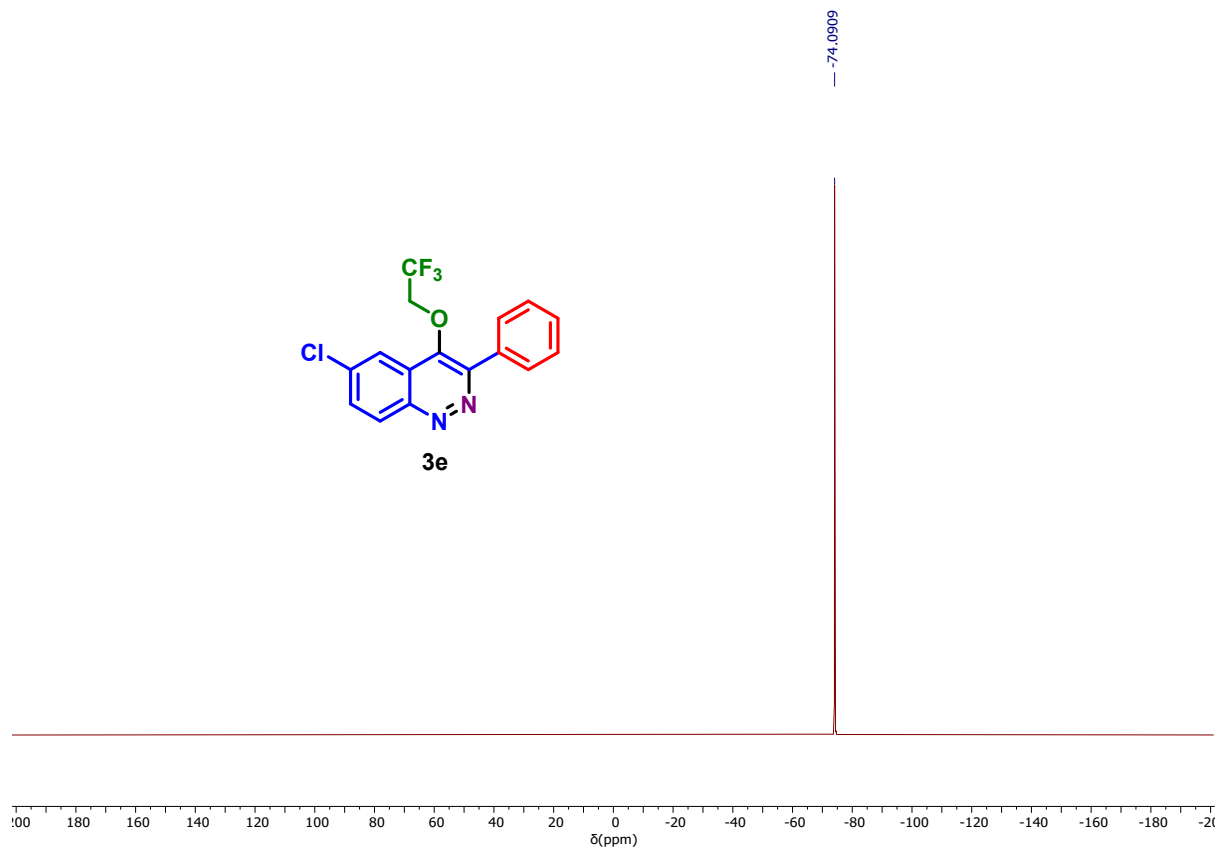

$^1\text{H}$ ,  $^{13}\text{C}\{^1\text{H}\}$  and  $^{19}\text{F}$  NMR ( $\text{CDCl}_3$ , 400, 101 and 376 MHz) of compound 3f:

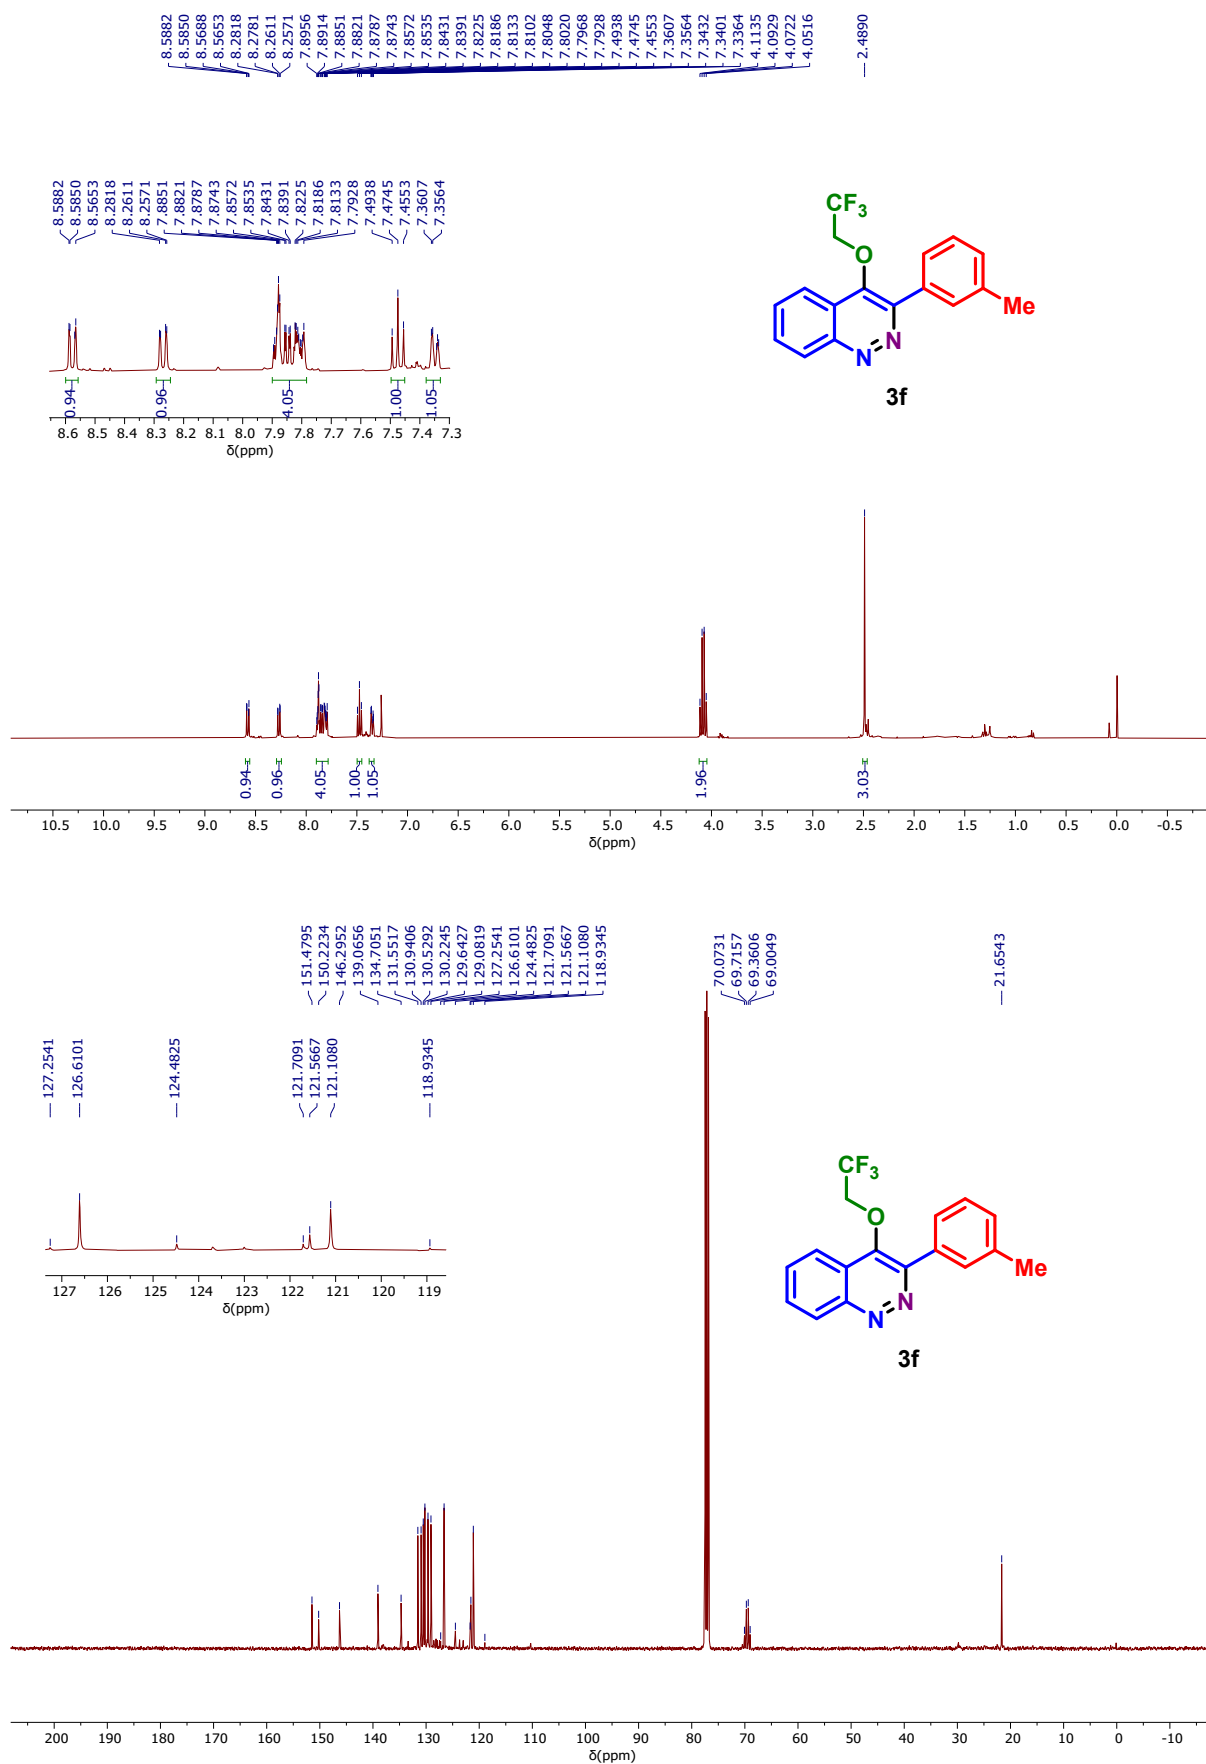

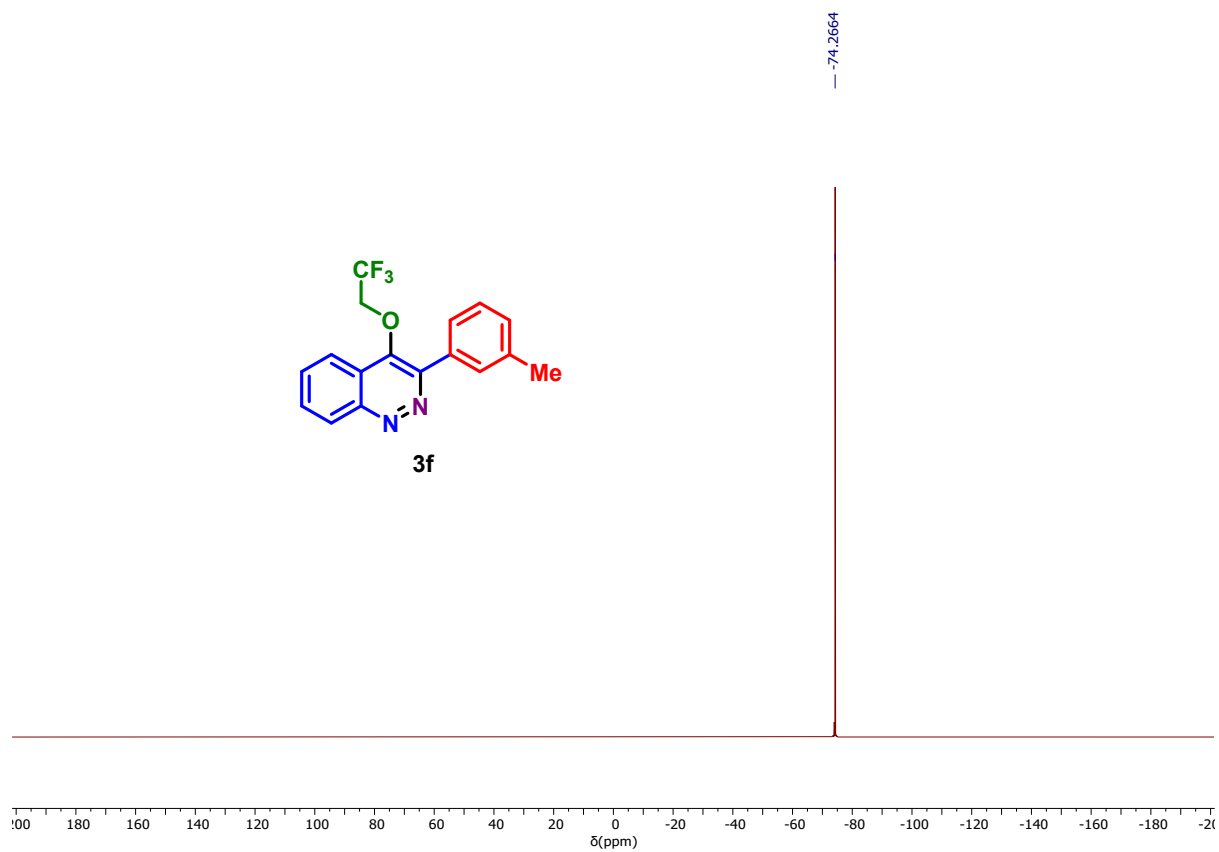

$^1\text{H}$ ,  $^{13}\text{C}\{^1\text{H}\}$  and  $^{19}\text{F}$  NMR (DMSO- $d_6$ , 400, 101 and 376 MHz) of non-separable mixture 3j and 6m:

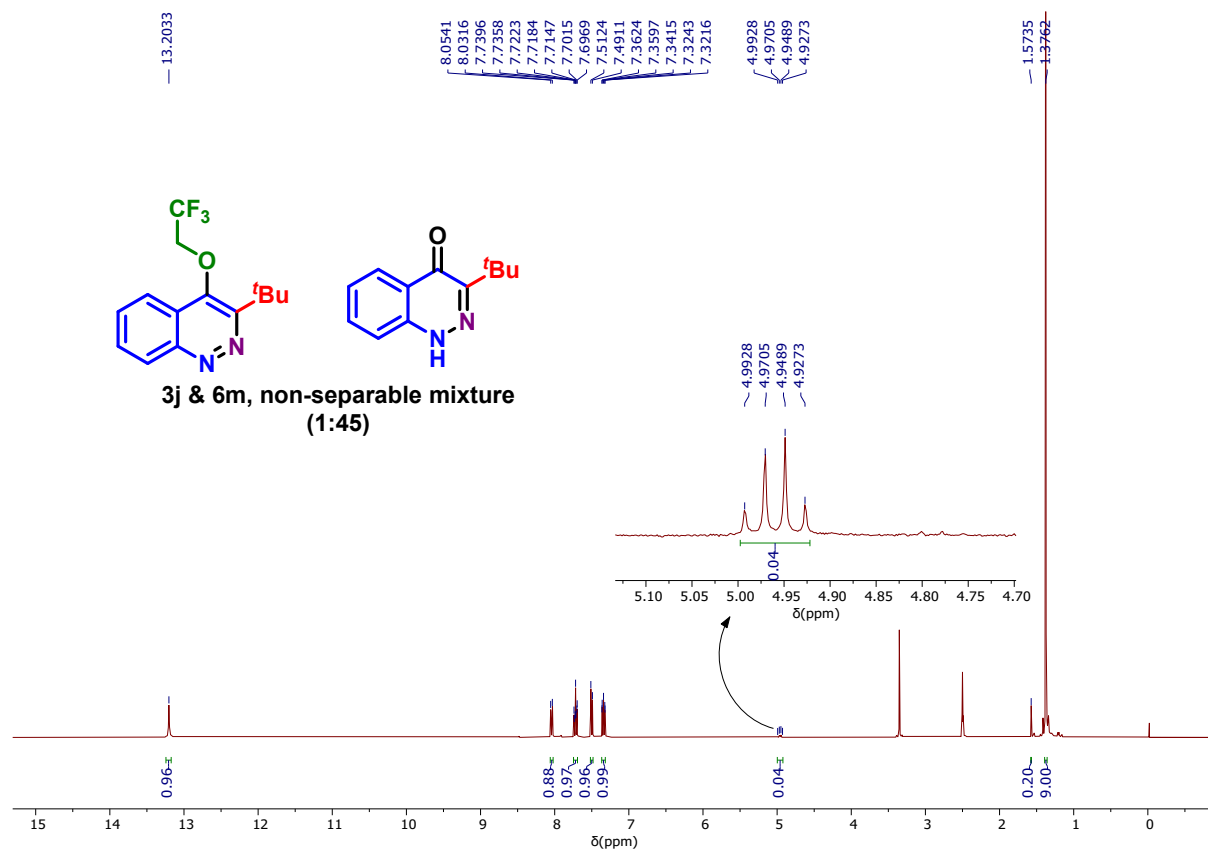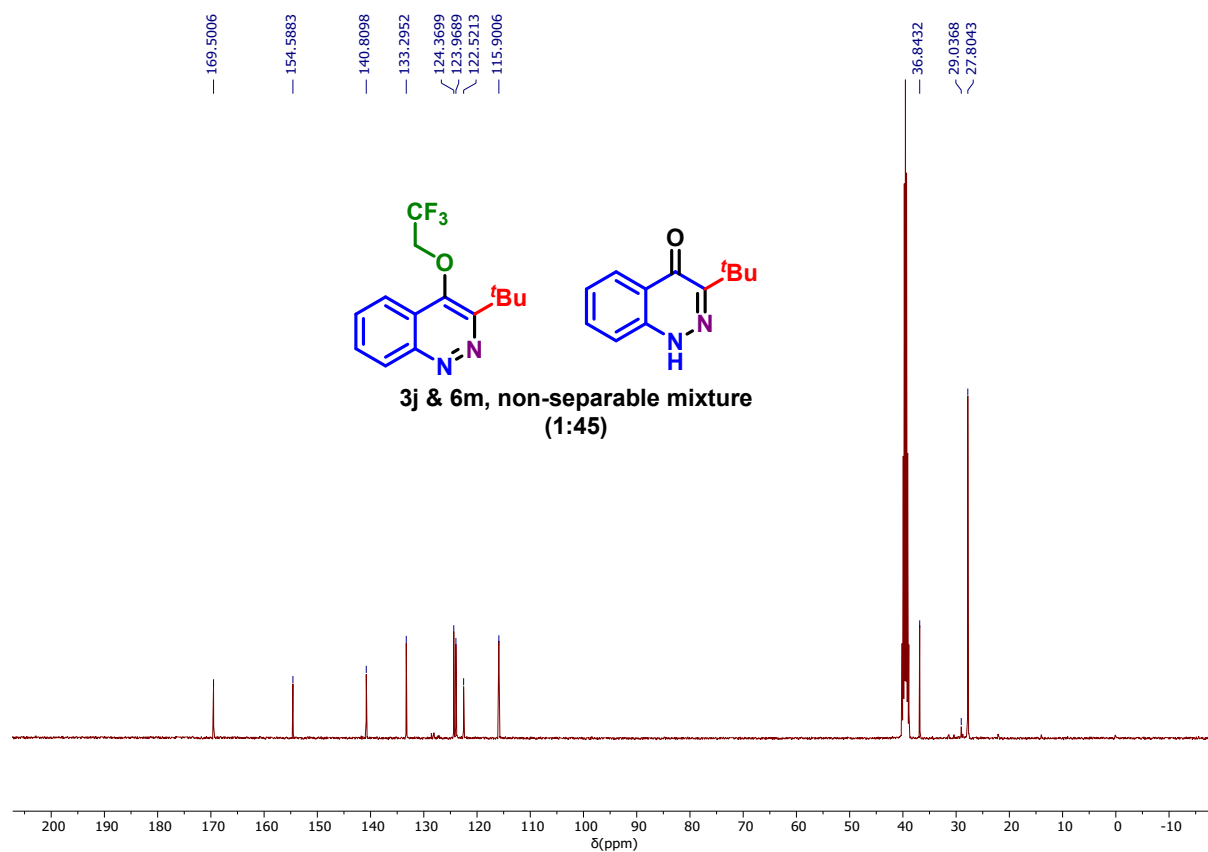

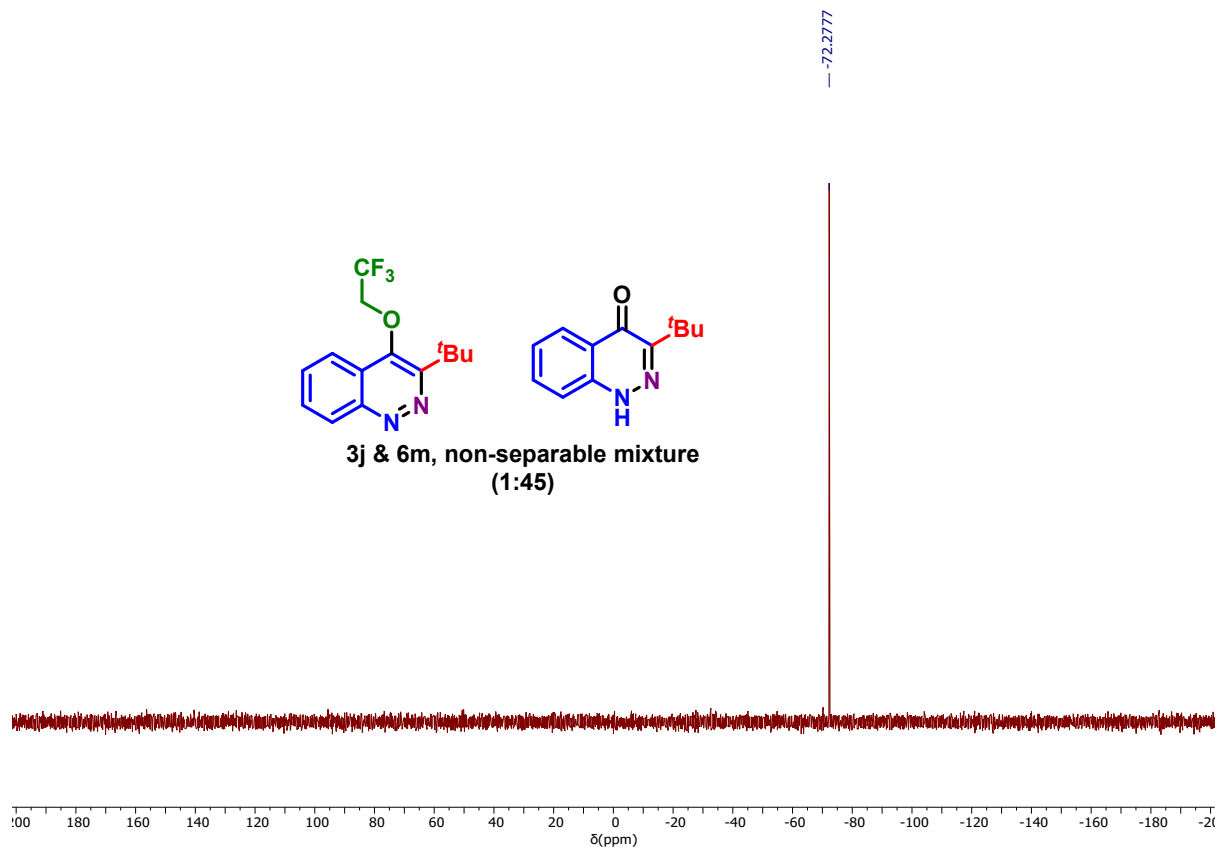

$^1\text{H}$ ,  $^{13}\text{C}\{^1\text{H}\}$  and  $^{19}\text{F}$  NMR (DMSO- $d_6$ , 400, 101 and 376 MHz) of non-separable mixture 3k and 6n:

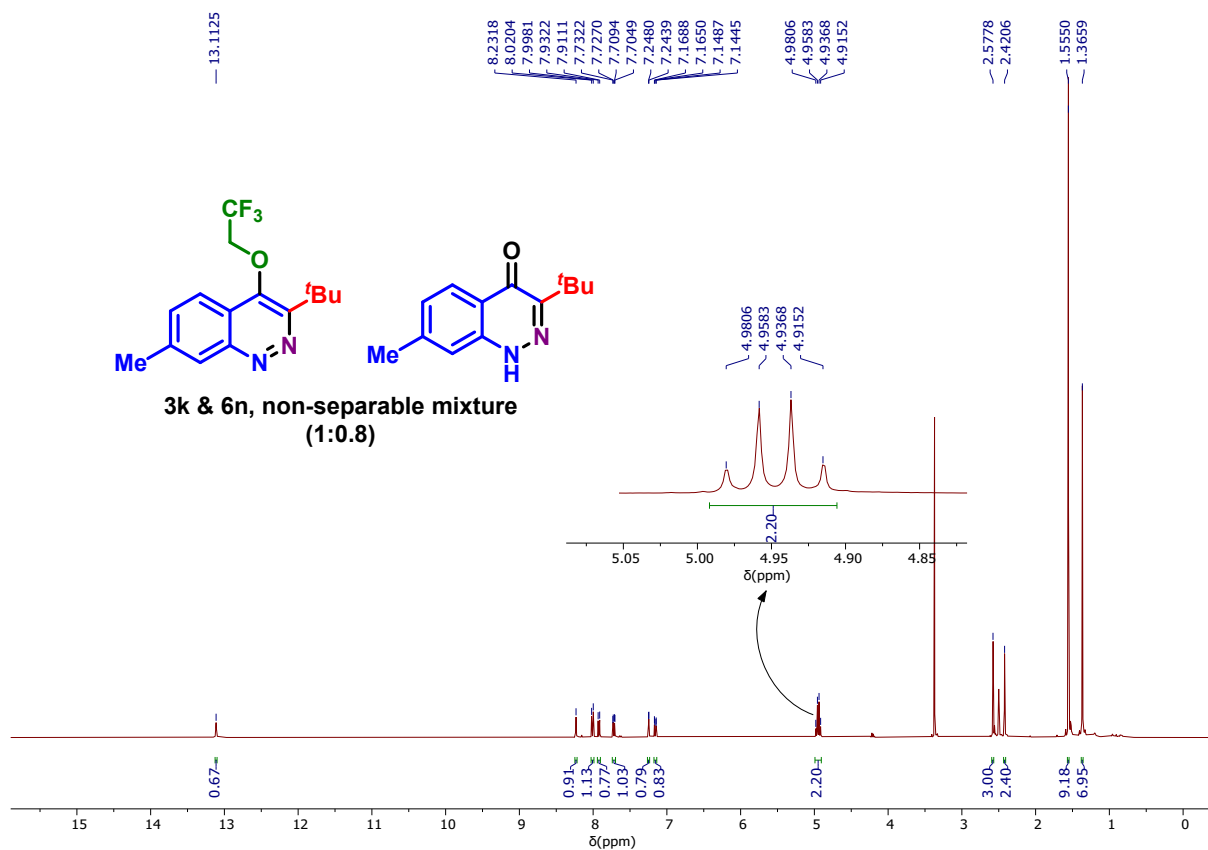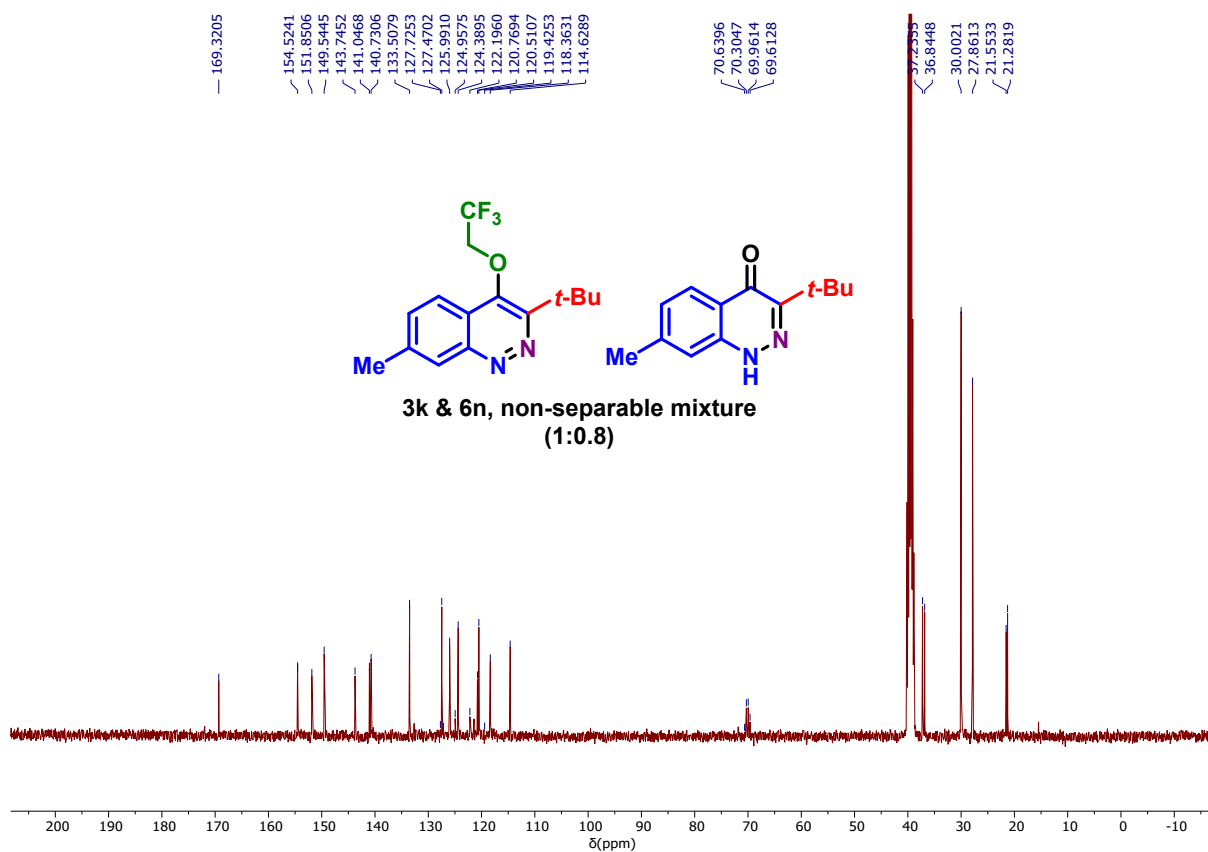

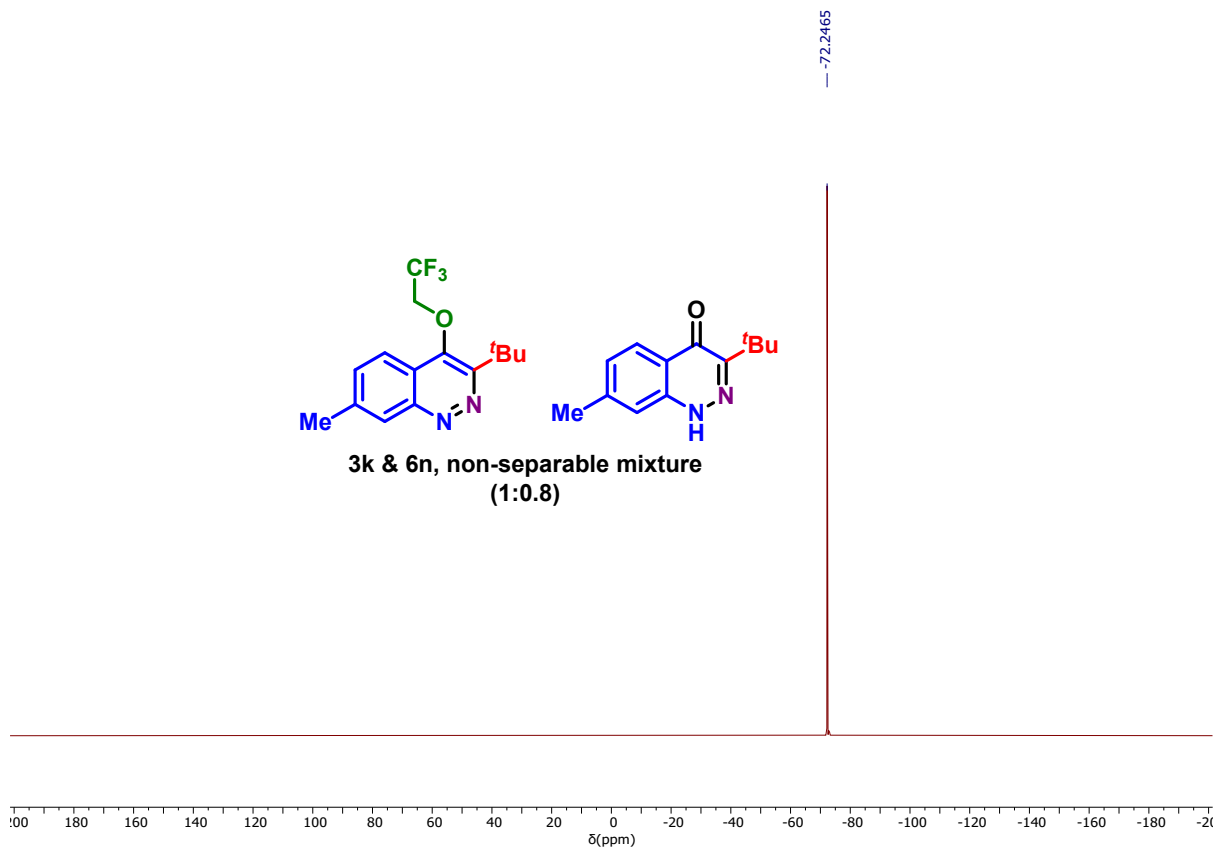



$^1\text{H}$ ,  $^{13}\text{C}\{^1\text{H}\}$  and  $^{19}\text{F}$  NMR (DMSO- $d_6$ , 400, 101 and 376 MHz) of non-separable mixture 3l and 6o:

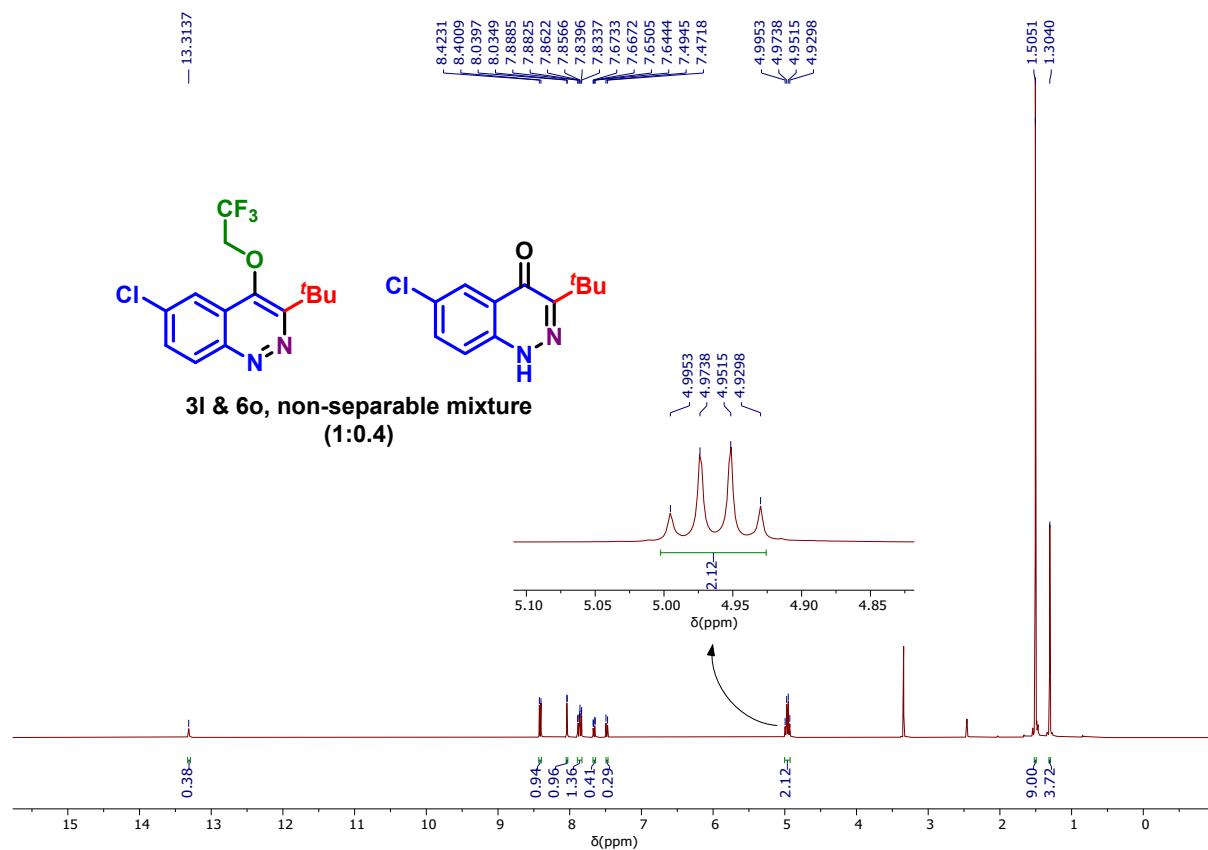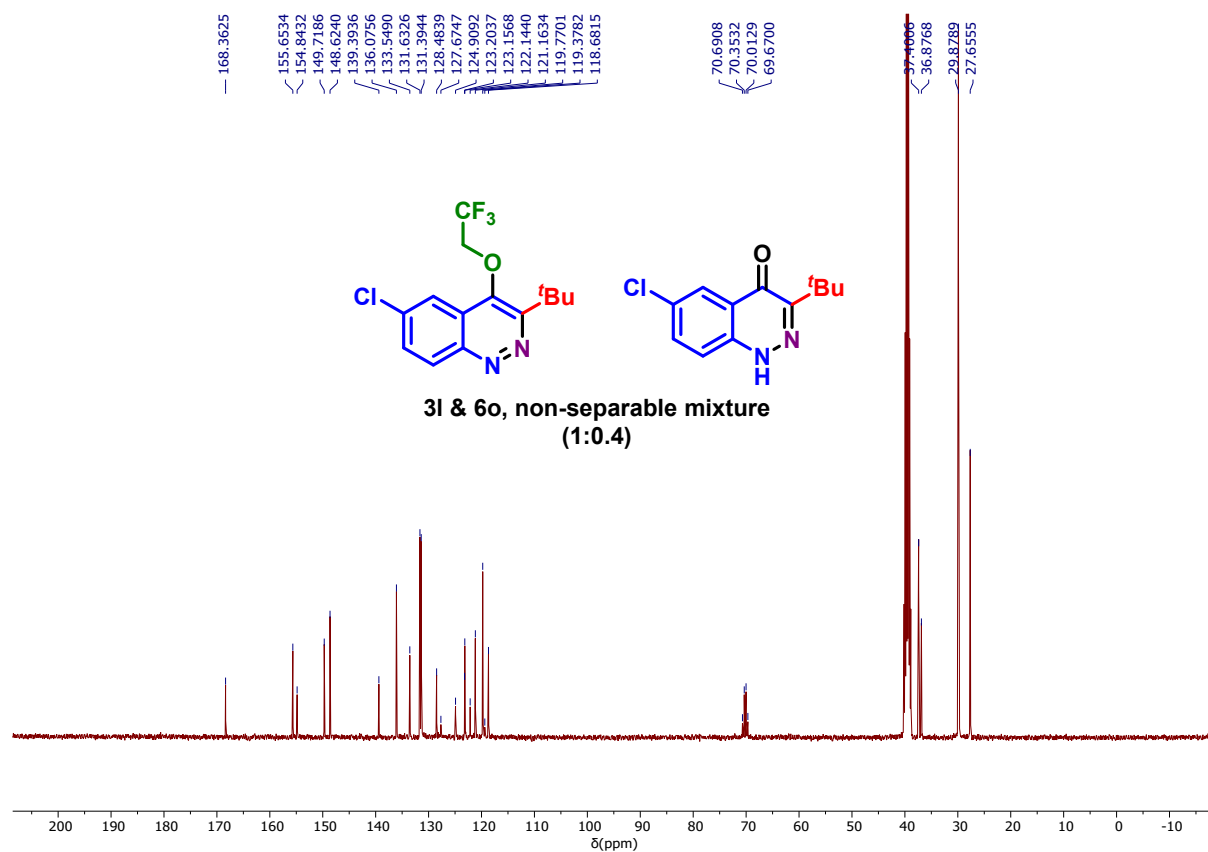

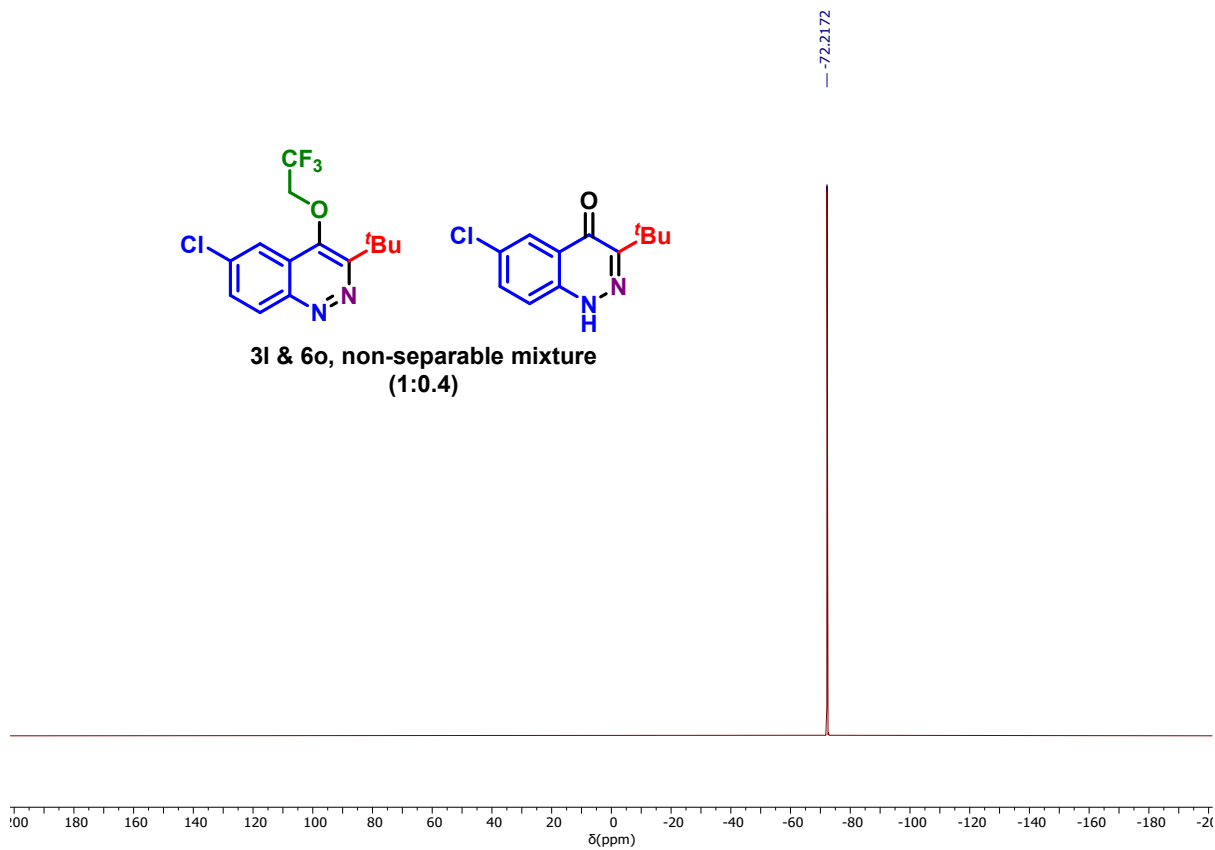

$^1\text{H}$ ,  $^{13}\text{C}\{^1\text{H}\}$  and  $^{19}\text{F}$  NMR (DMSO- $d_6$ , 400, 101 and 376 MHz) of non-separable mixture 3m and 6p:

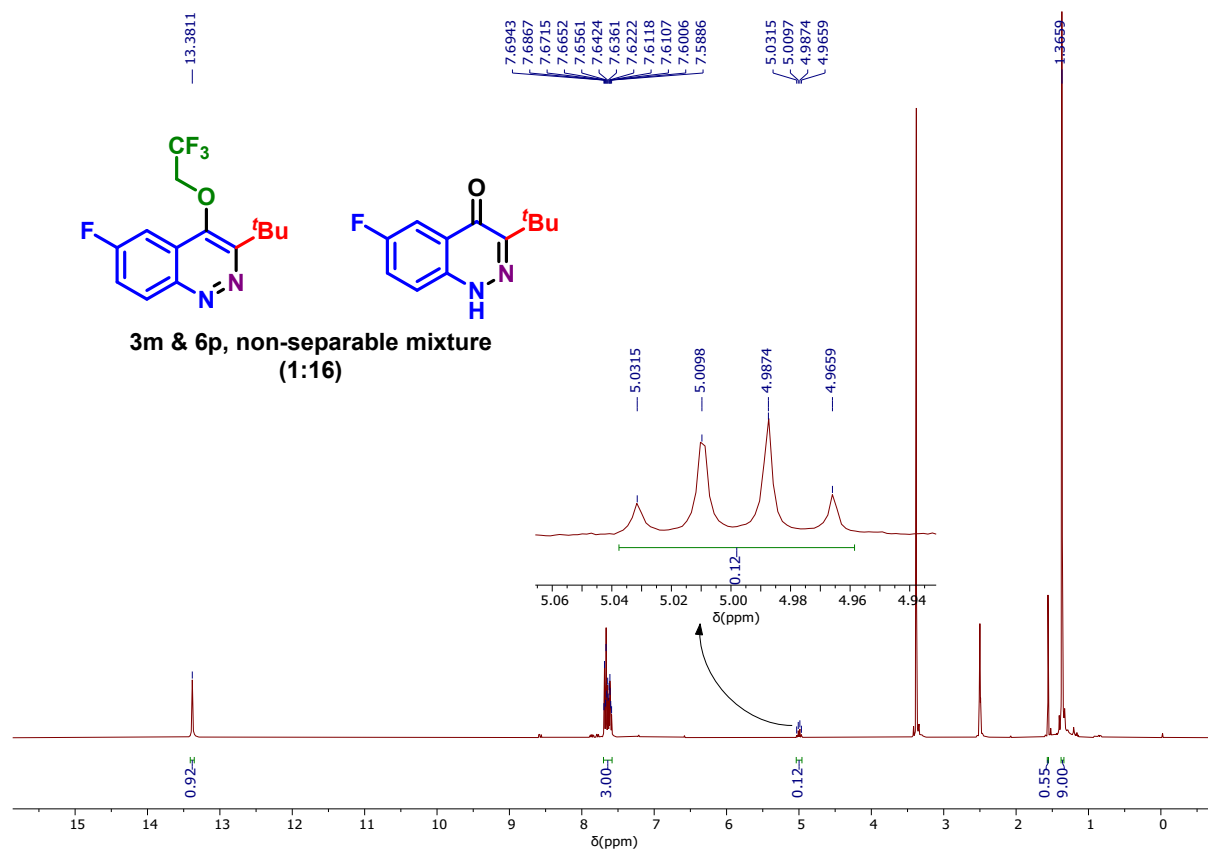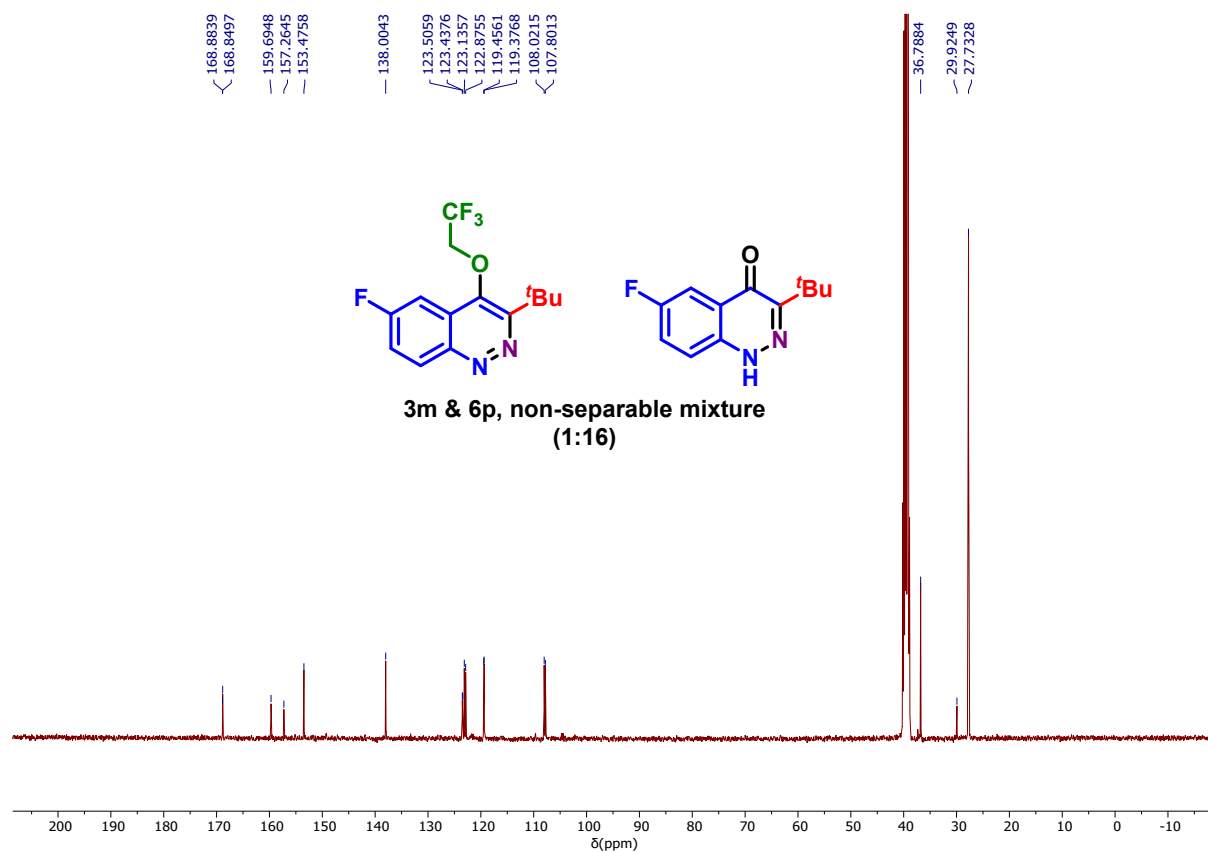

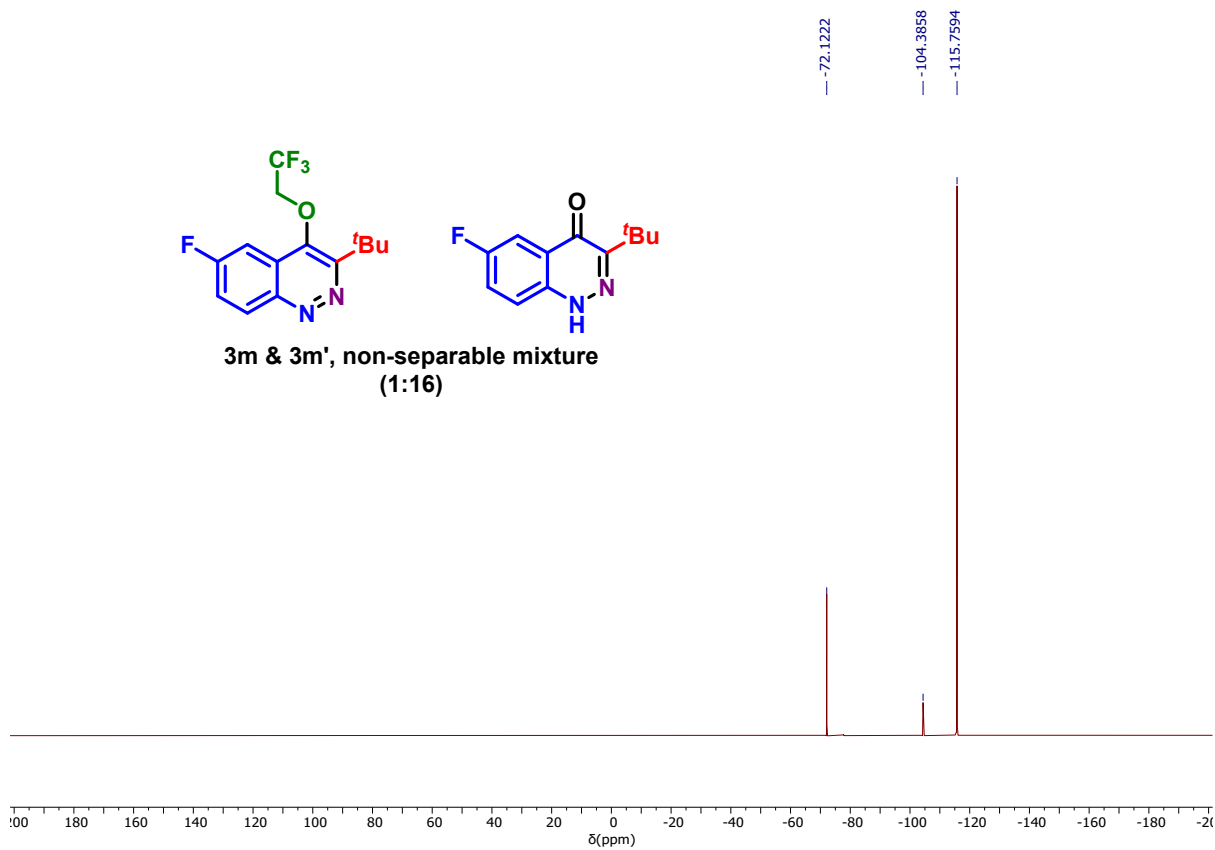

# $^1\text{H}$ and $^{13}\text{C}\{^1\text{H}\}$ NMR ( $\text{CDCl}_3$ , 400 and 101 MHz) of compound 5a:

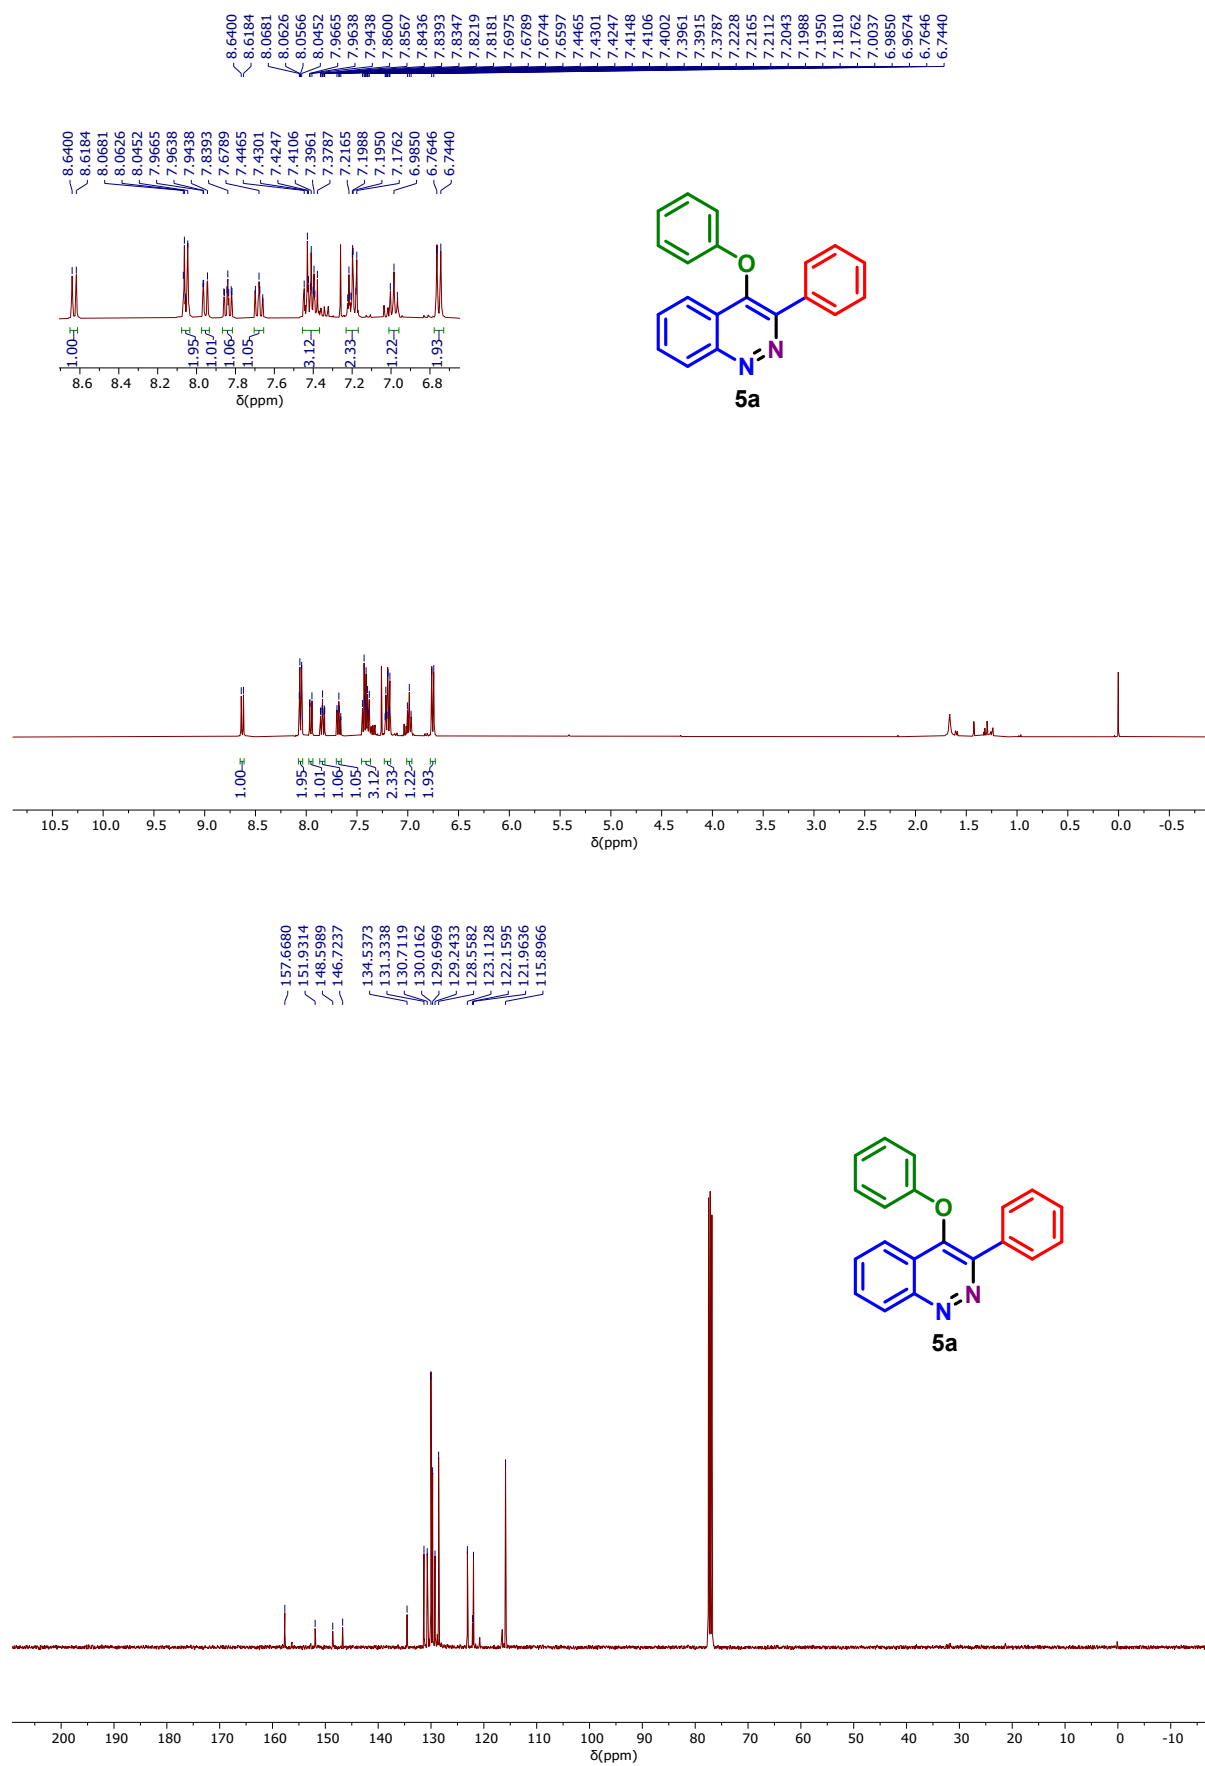

$^1\text{H}$  and  $^{13}\text{C}\{^1\text{H}\}$  NMR ( $\text{CDCl}_3$ , 400 and 101 MHz) of compound **5b**:

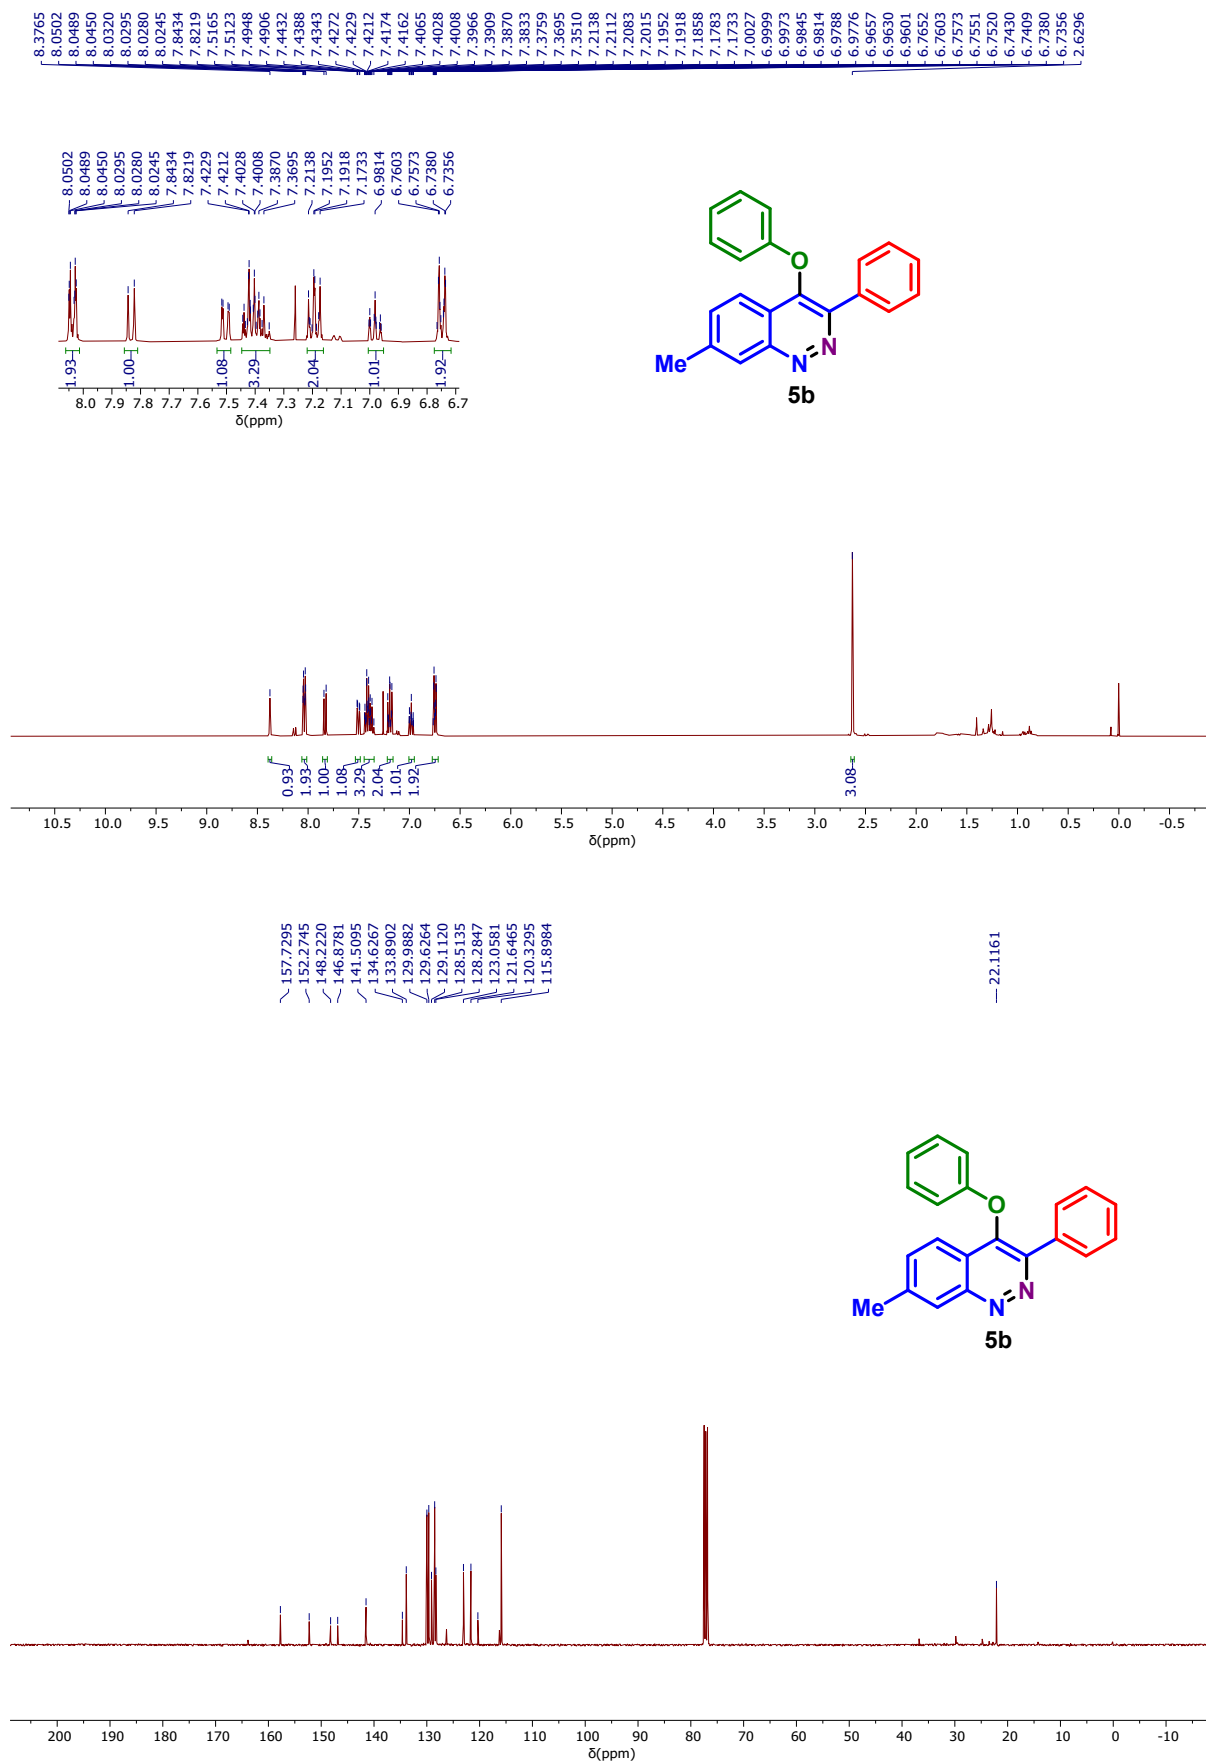

$^1\text{H}$  and  $^{13}\text{C}\{^1\text{H}\}$  NMR ( $\text{CDCl}_3$ , 400 and 101 MHz) of compound **5c**:

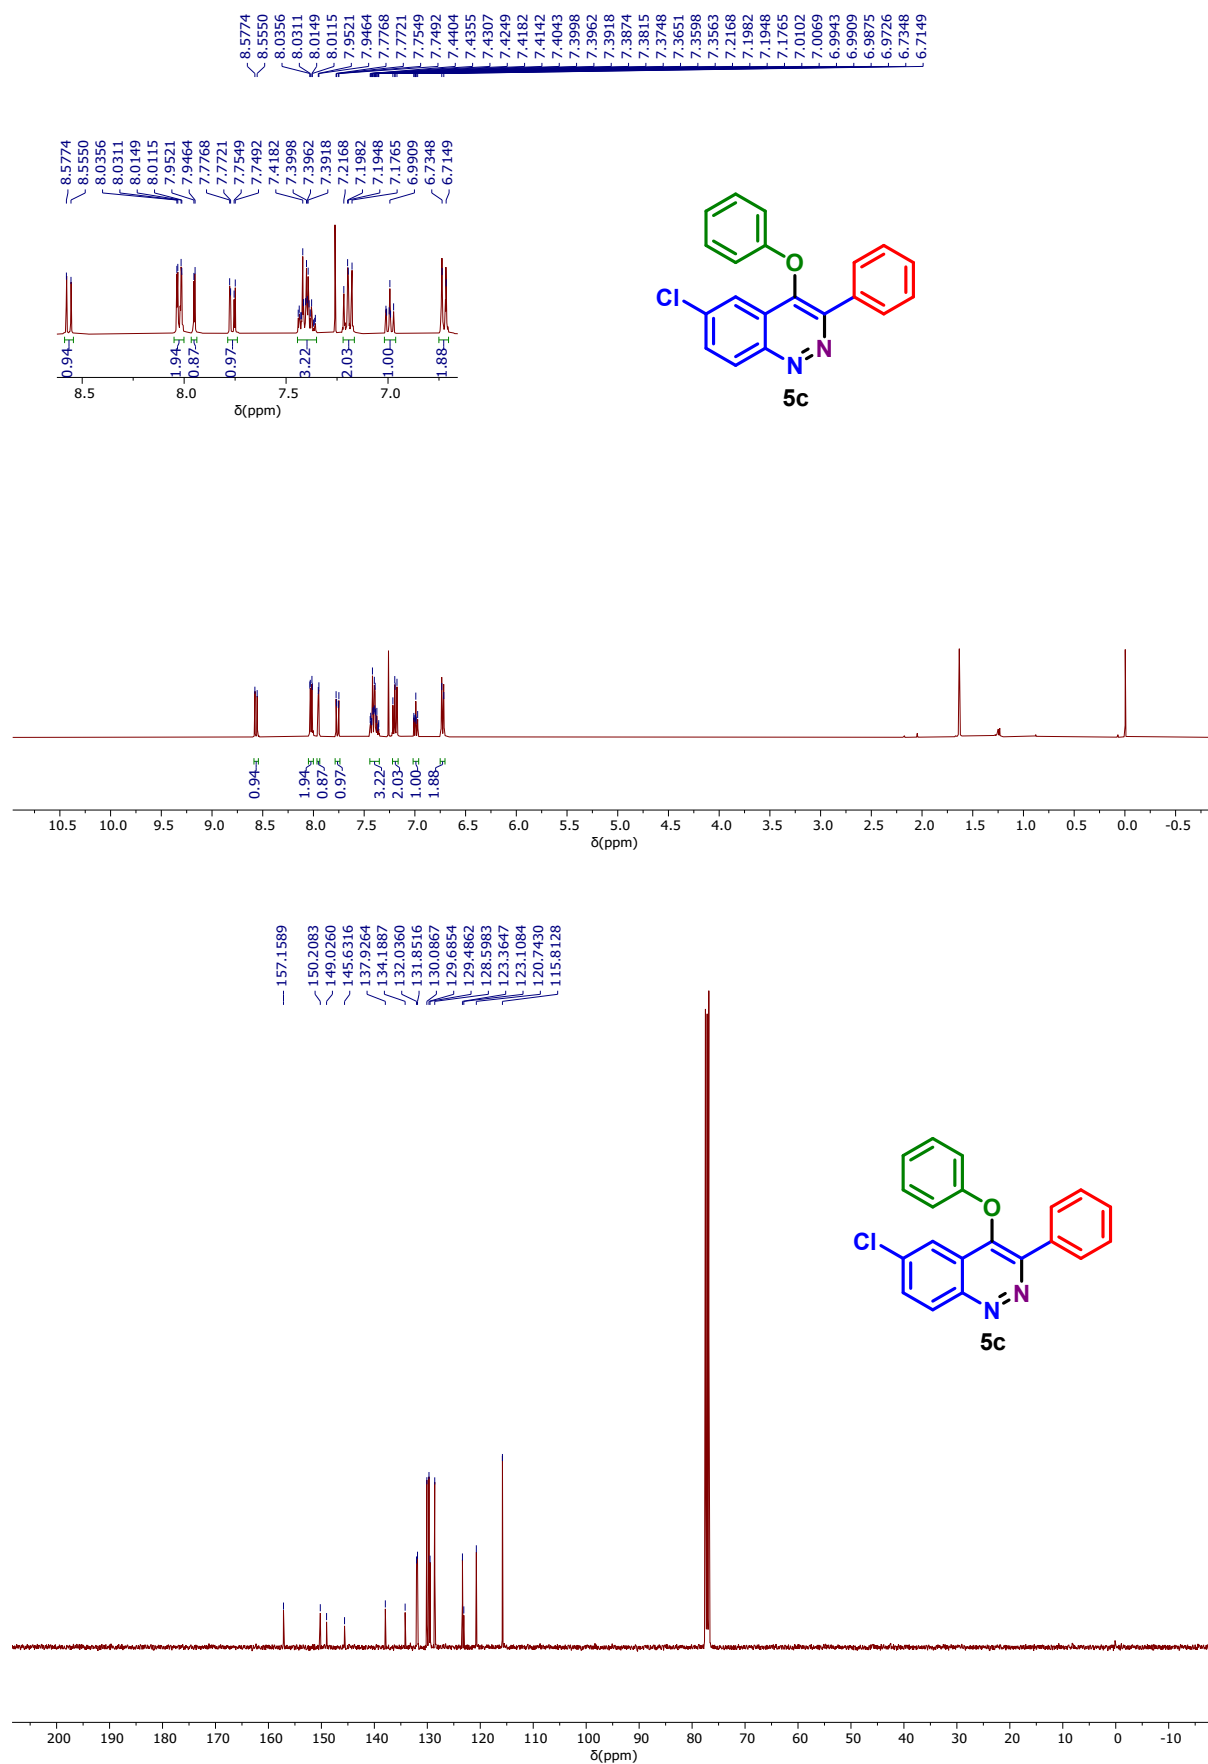

$^1\text{H}$  and  $^{13}\text{C}\{^1\text{H}\}$  NMR ( $\text{CDCl}_3$ , 400 and 101 MHz) of compound **5d**:

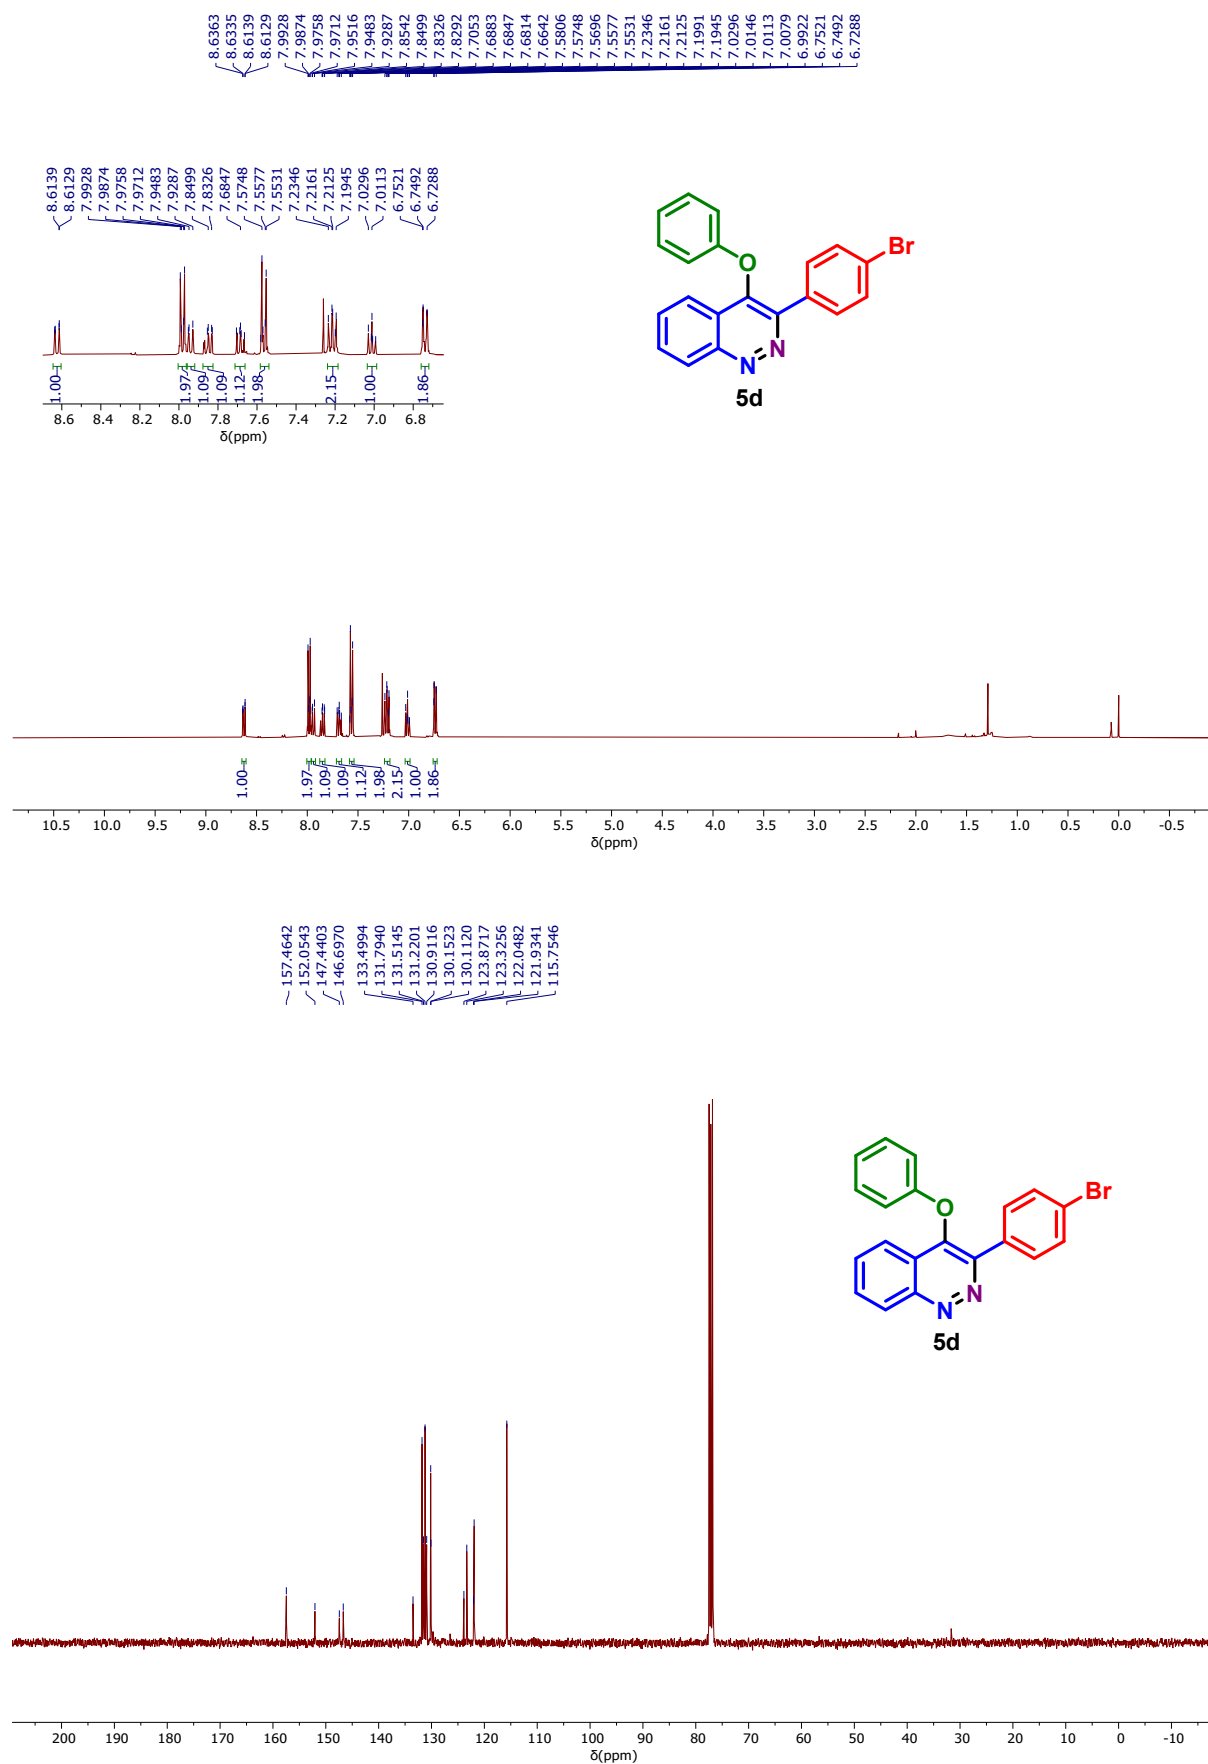



$^1\text{H}$ ,  $^{13}\text{C}\{^1\text{H}\}$  and  $^{19}\text{F}$  NMR ( $\text{CDCl}_3$ , 400, 101 and 376 MHz) of compound **5e**:

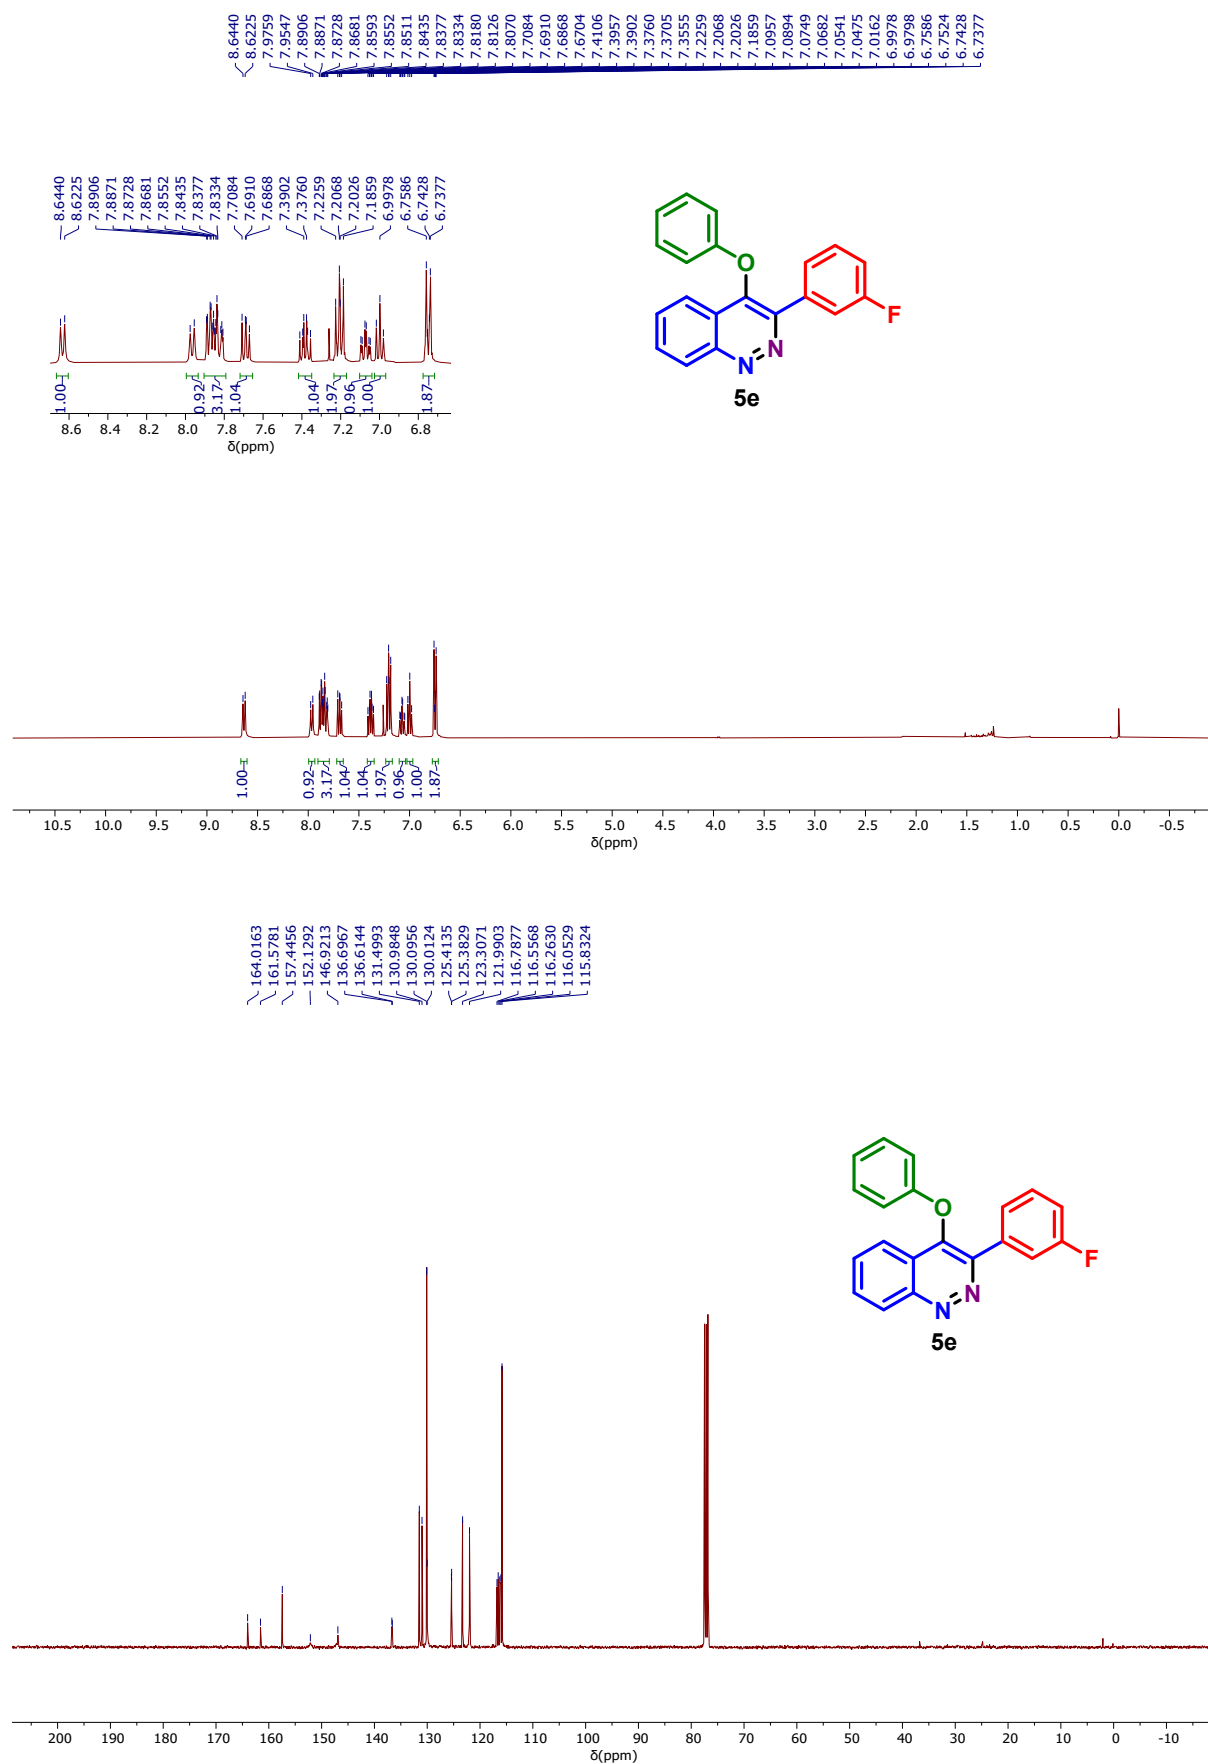

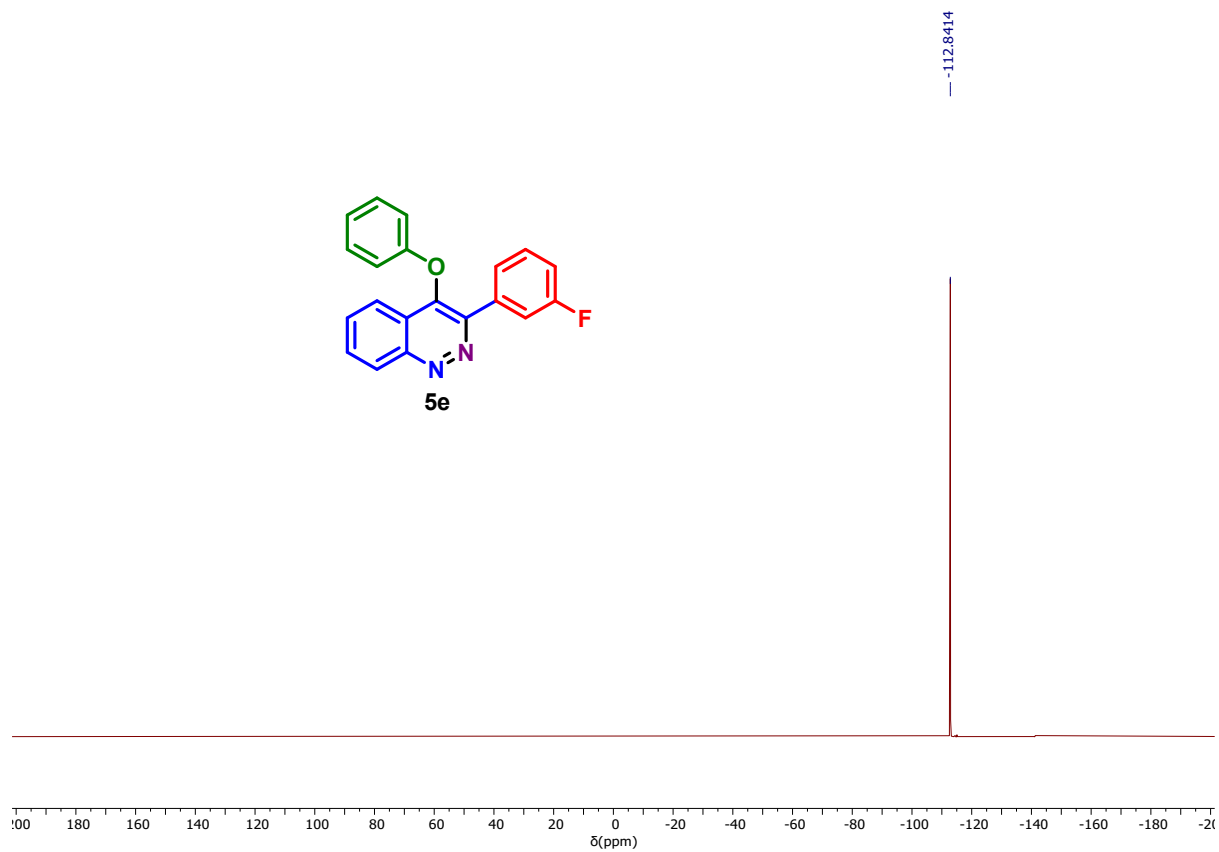

$^1\text{H}$ ,  $^{13}\text{C}\{^1\text{H}\}$  and  $^{19}\text{F}$  NMR ( $\text{CDCl}_3$ , 400, 101 and 376 MHz) of compound **5f**:

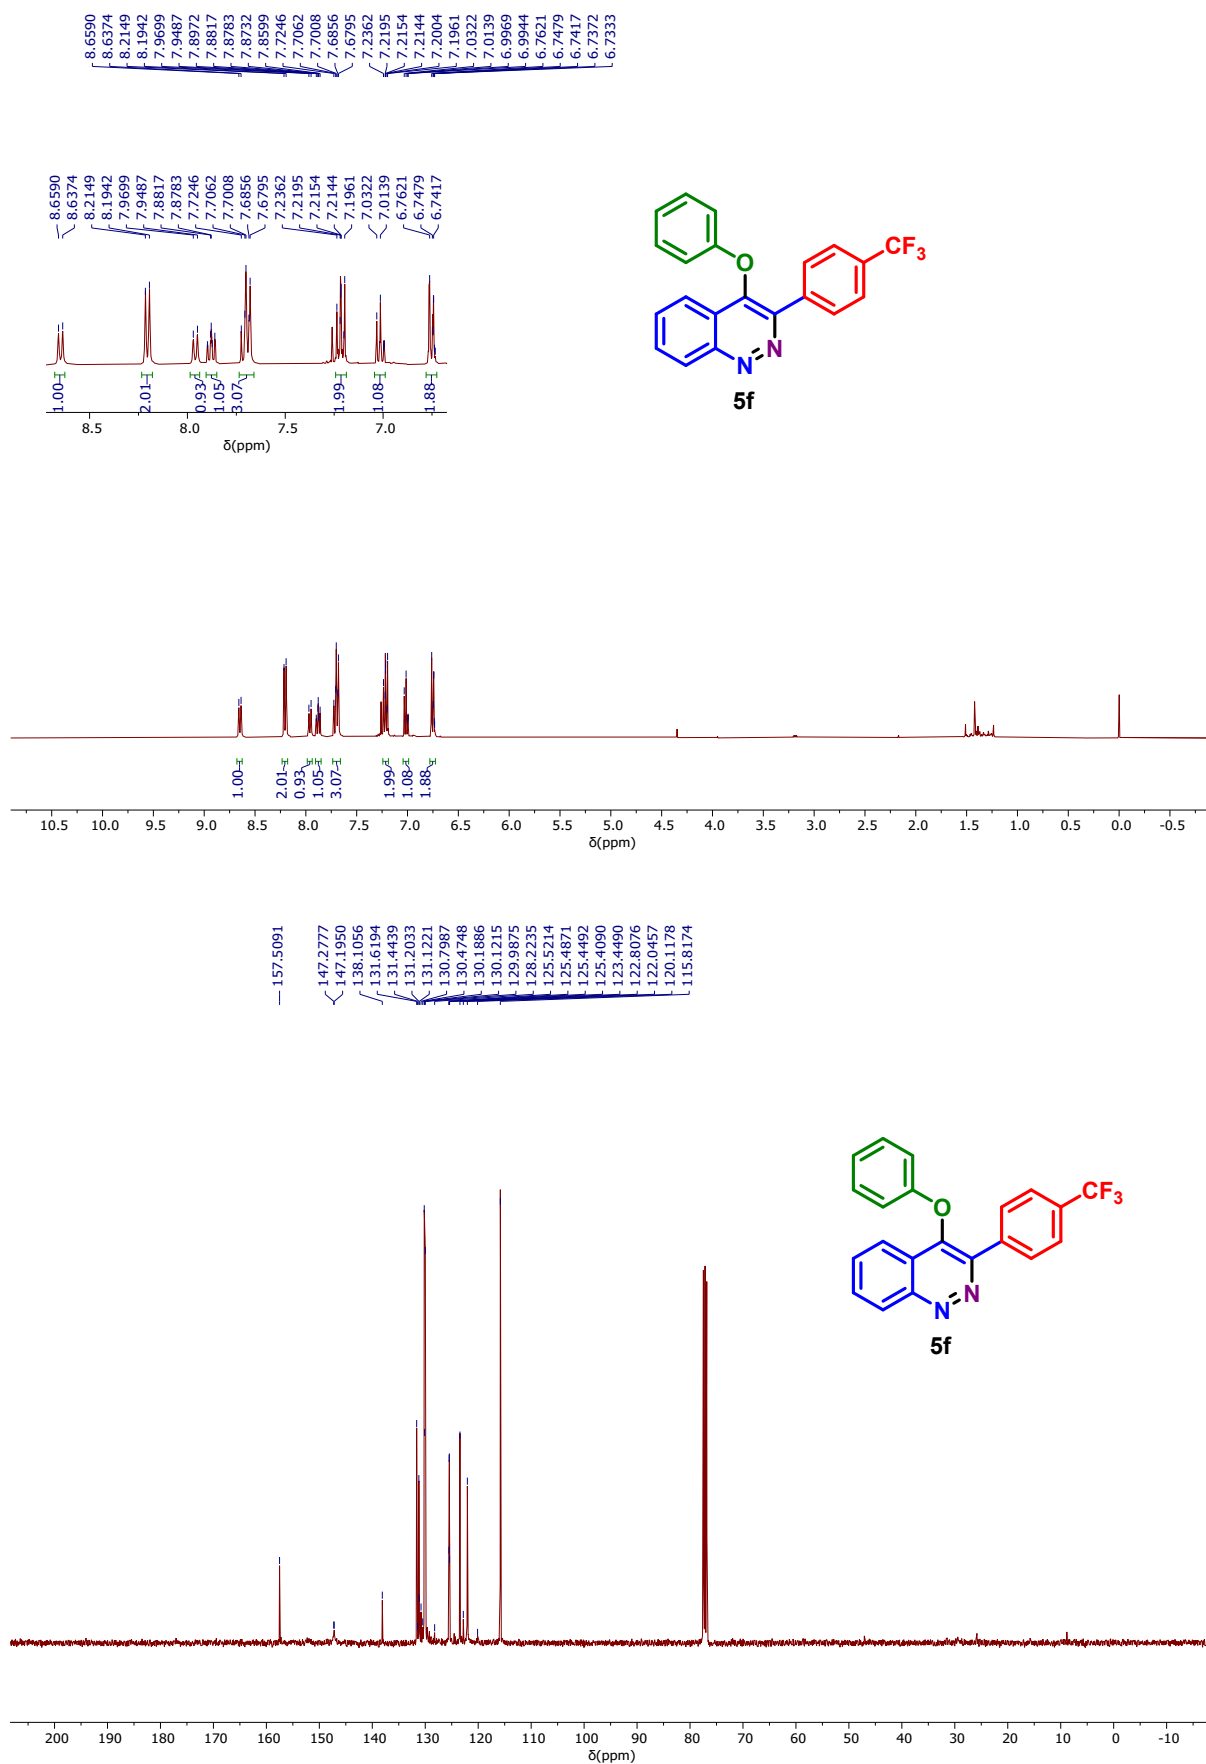

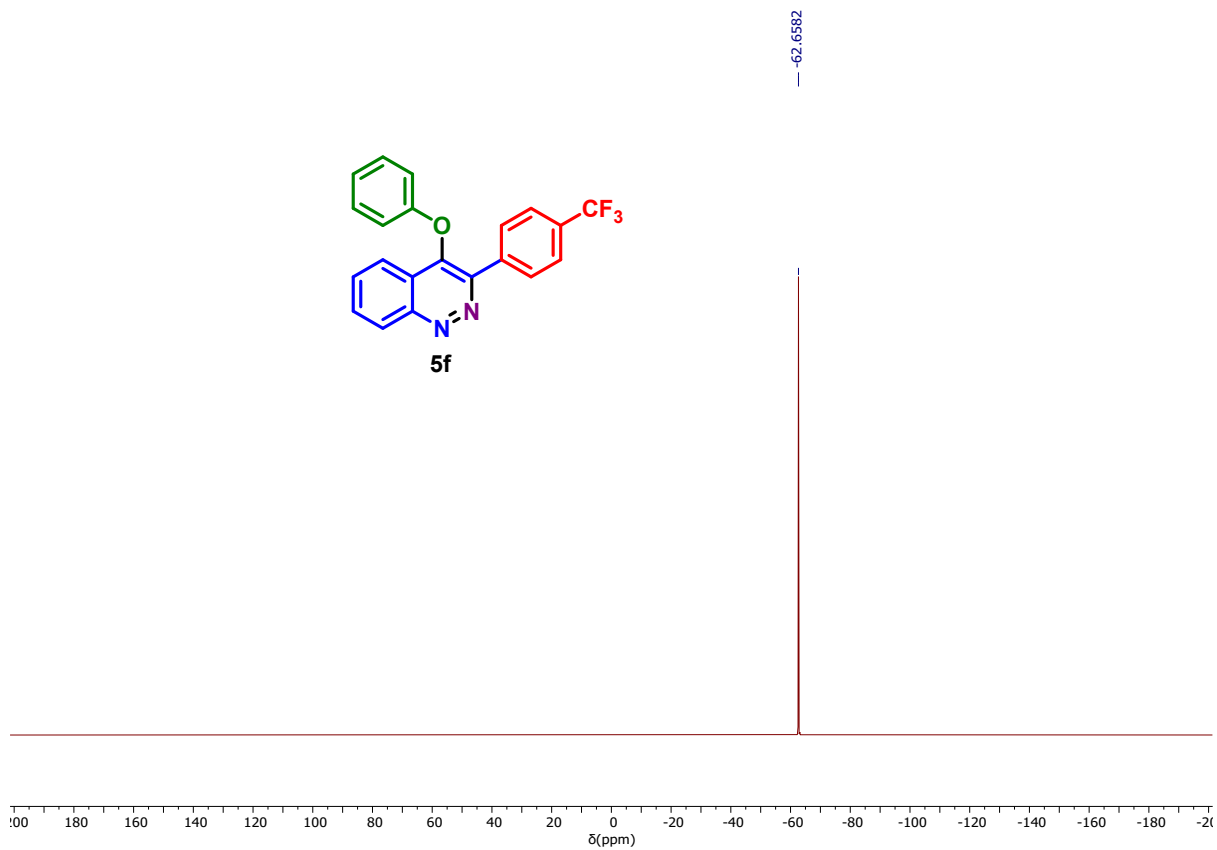

$^1\text{H}$  and  $^{13}\text{C}\{^1\text{H}\}$  NMR ( $\text{CDCl}_3$ , 400 and 101 MHz) of compound **5i**:

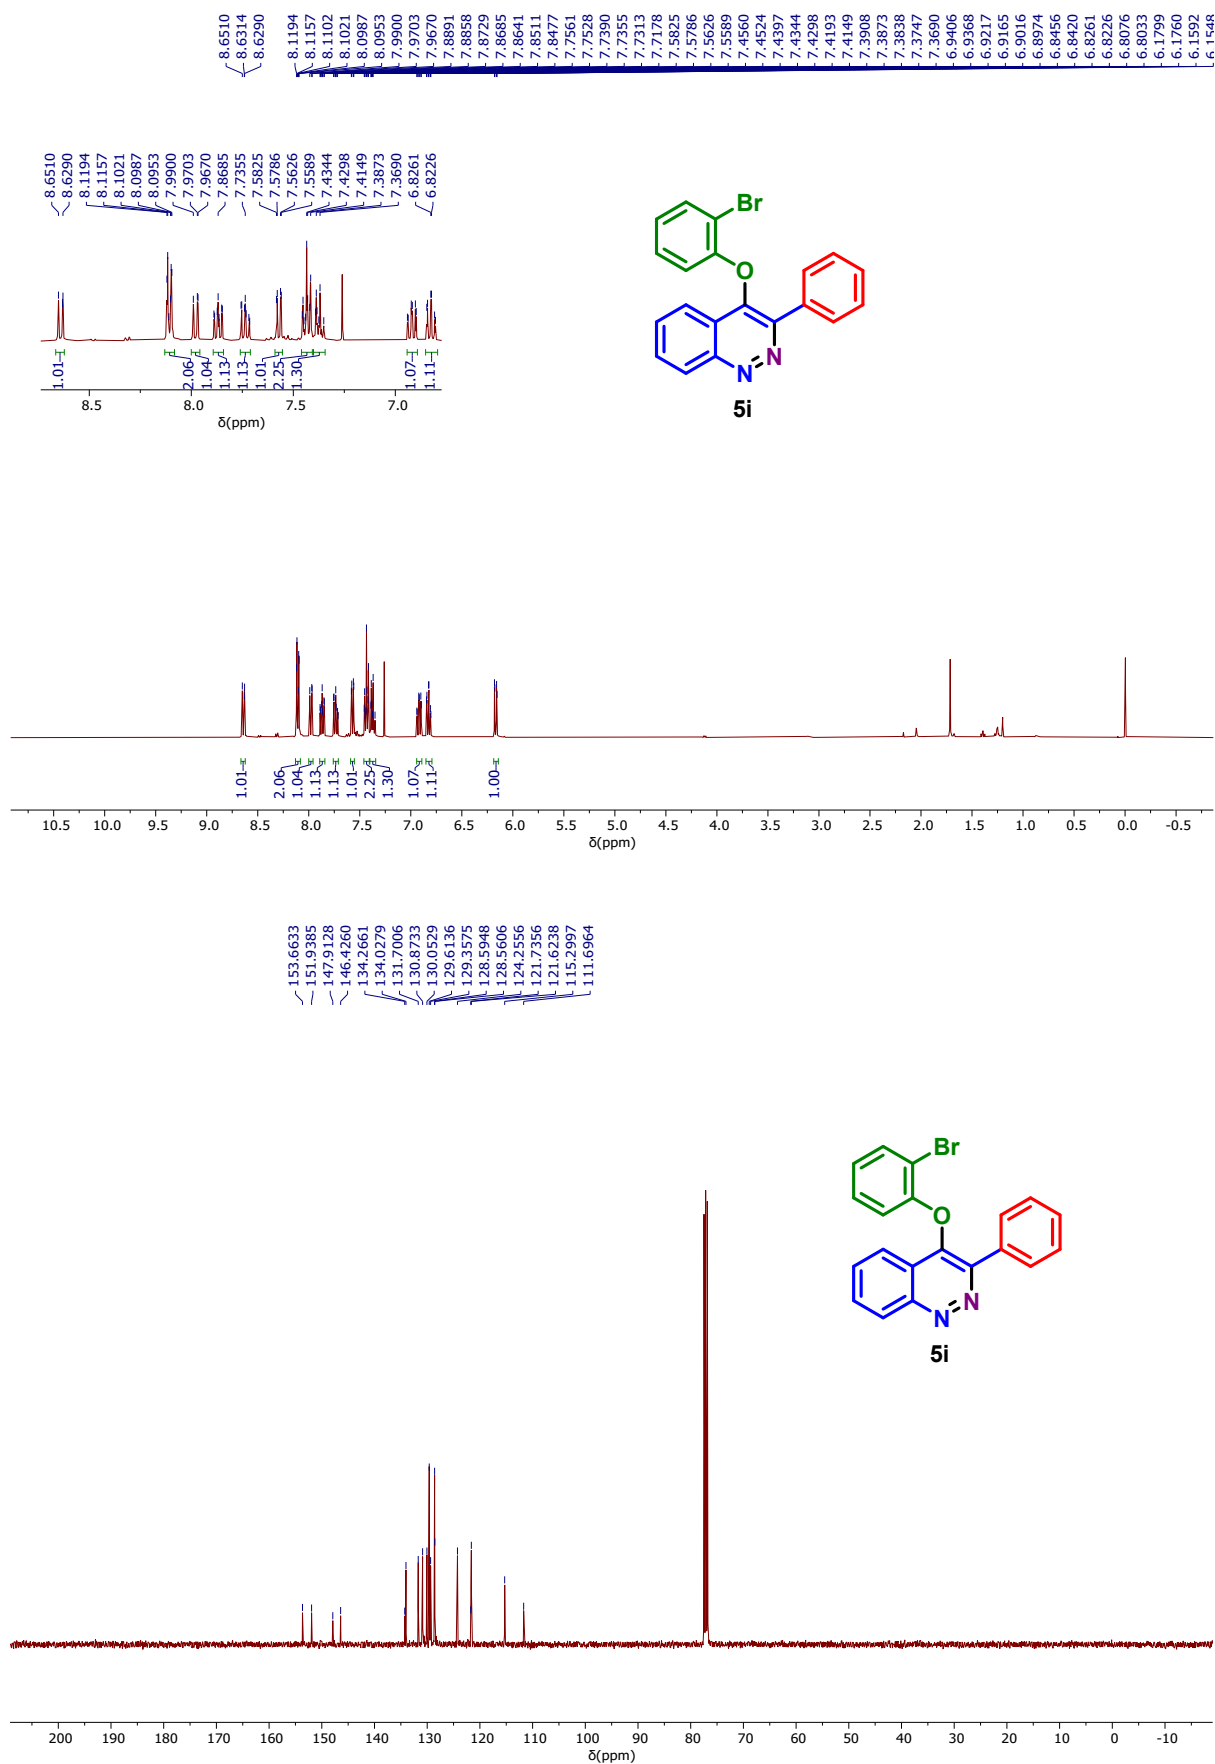

<sup>1</sup>H, <sup>13</sup>C{<sup>1</sup>H} and <sup>19</sup>F NMR (CDCl<sub>3</sub>, 400, 101 and 376 MHz) of compound 5j:

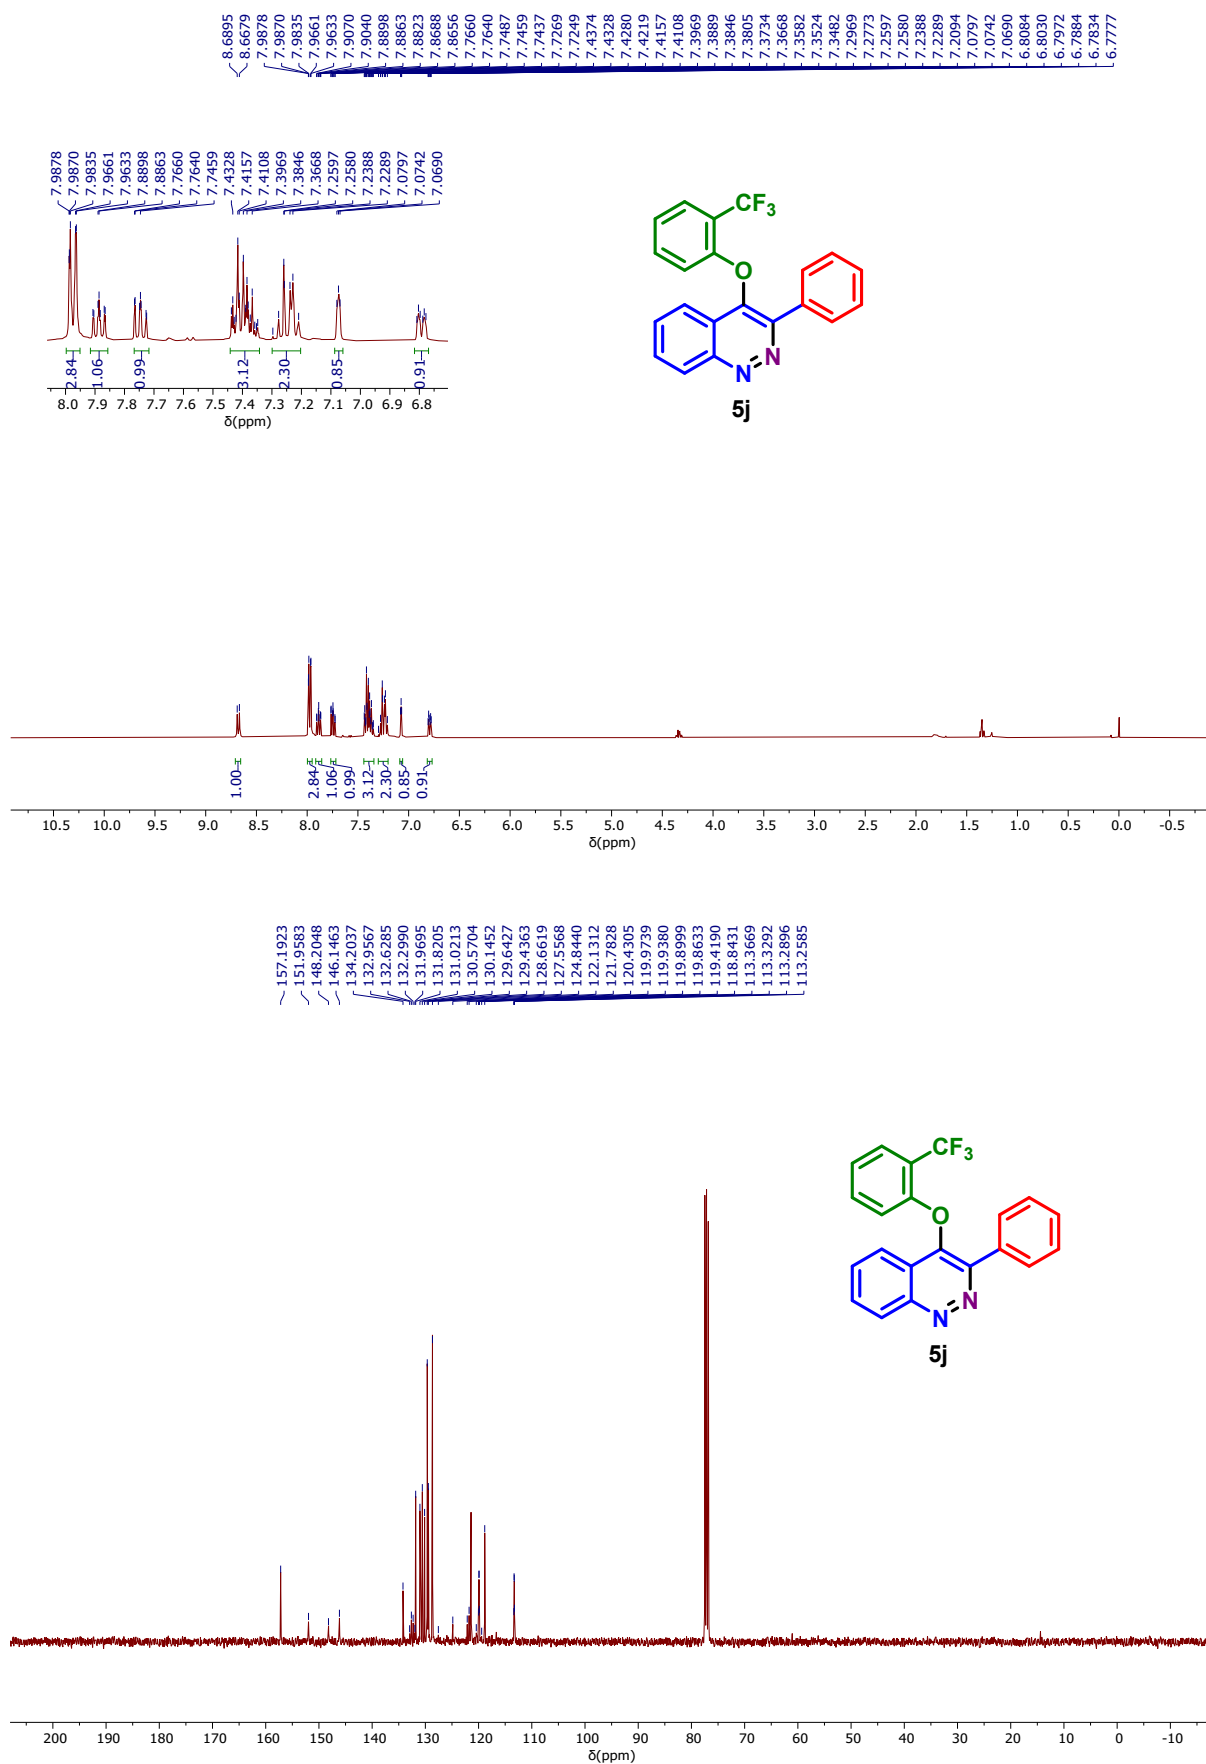

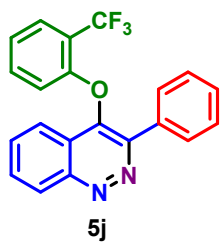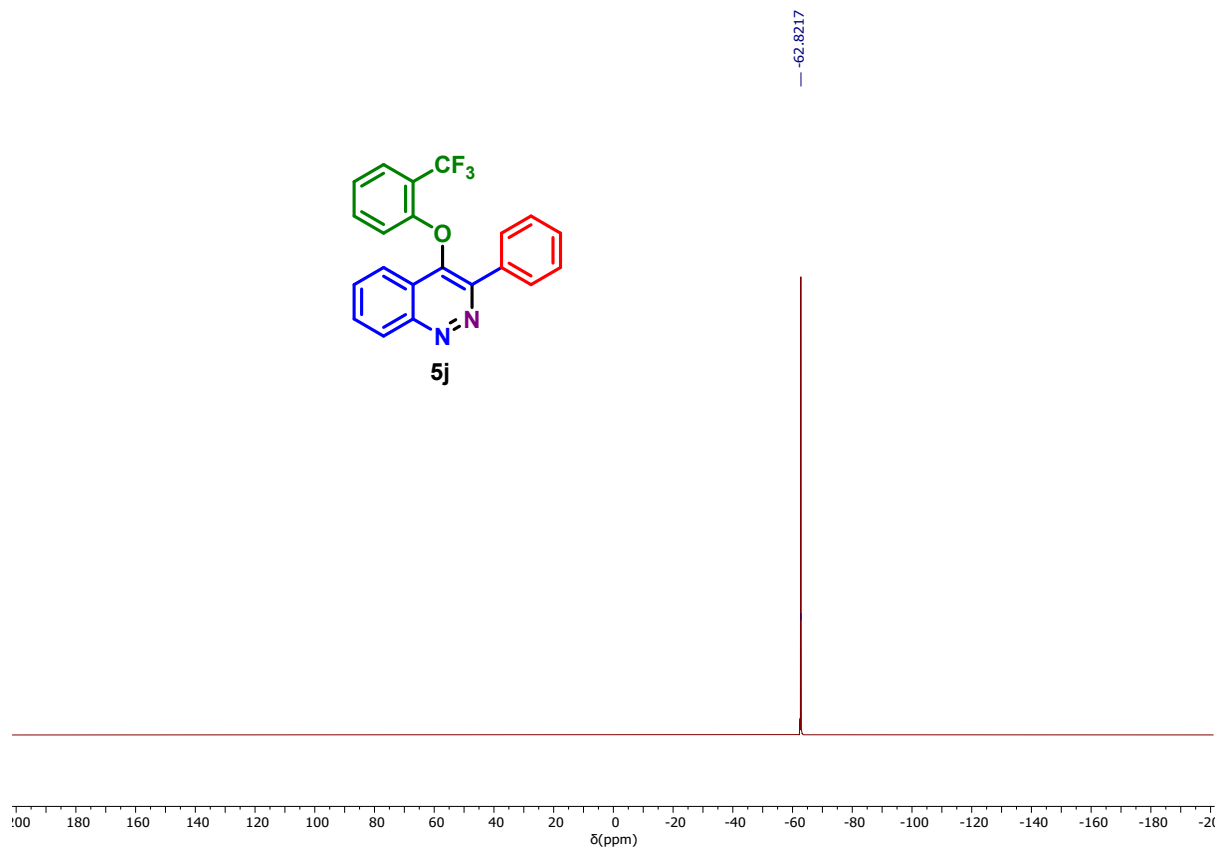

$^1\text{H}$  and  $^{13}\text{C}\{^1\text{H}\}$  NMR ( $\text{CDCl}_3$ , 400 and 101 MHz) of compound 5k:

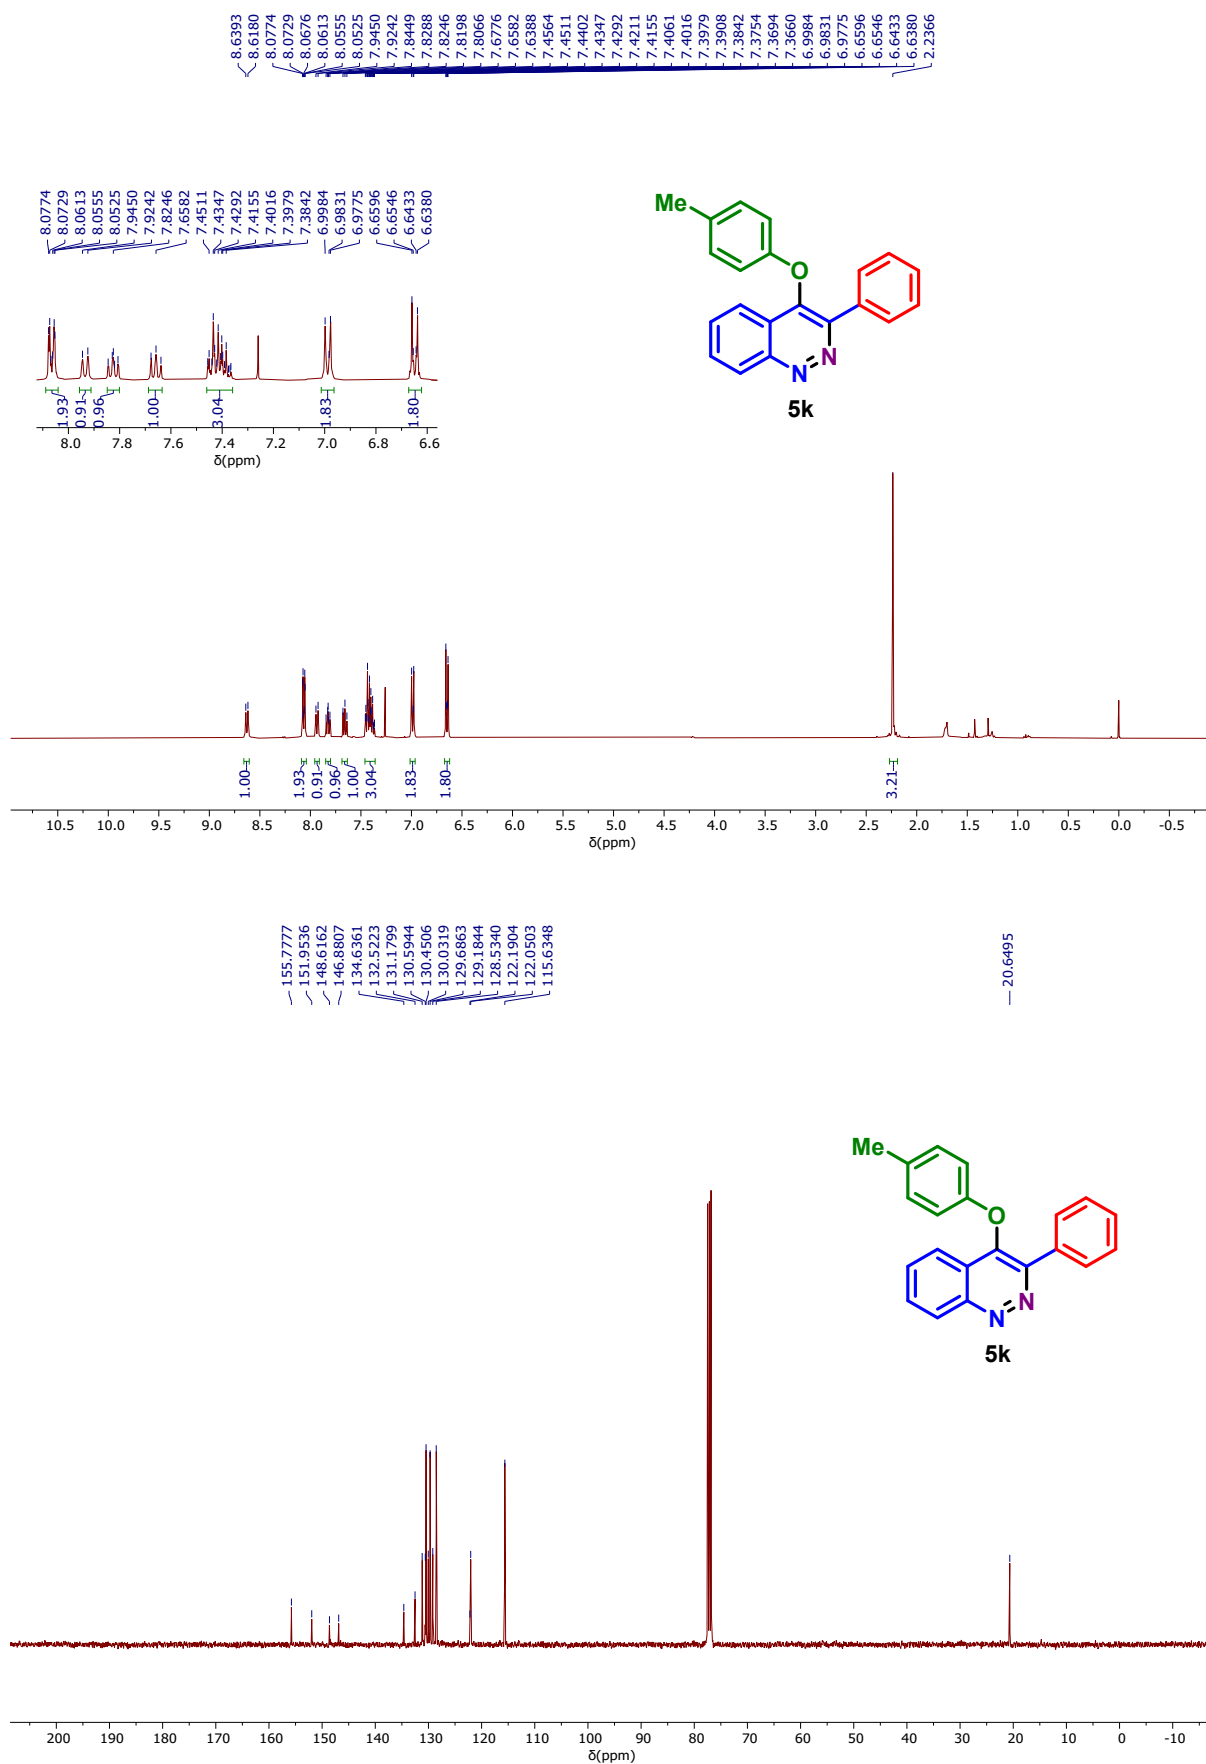



$^1\text{H}$  and  $^{13}\text{C}\{^1\text{H}\}$  NMR ( $\text{CDCl}_3$ , 400 and 101 MHz) of compound 5l:

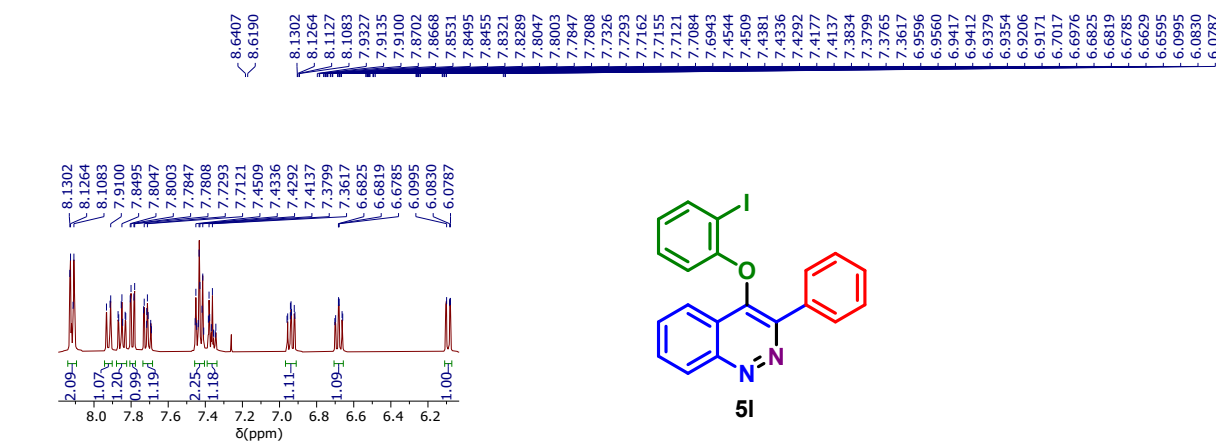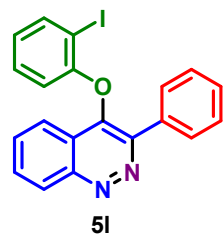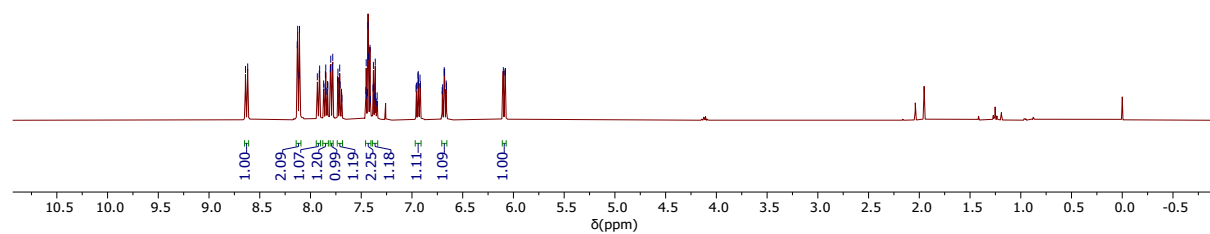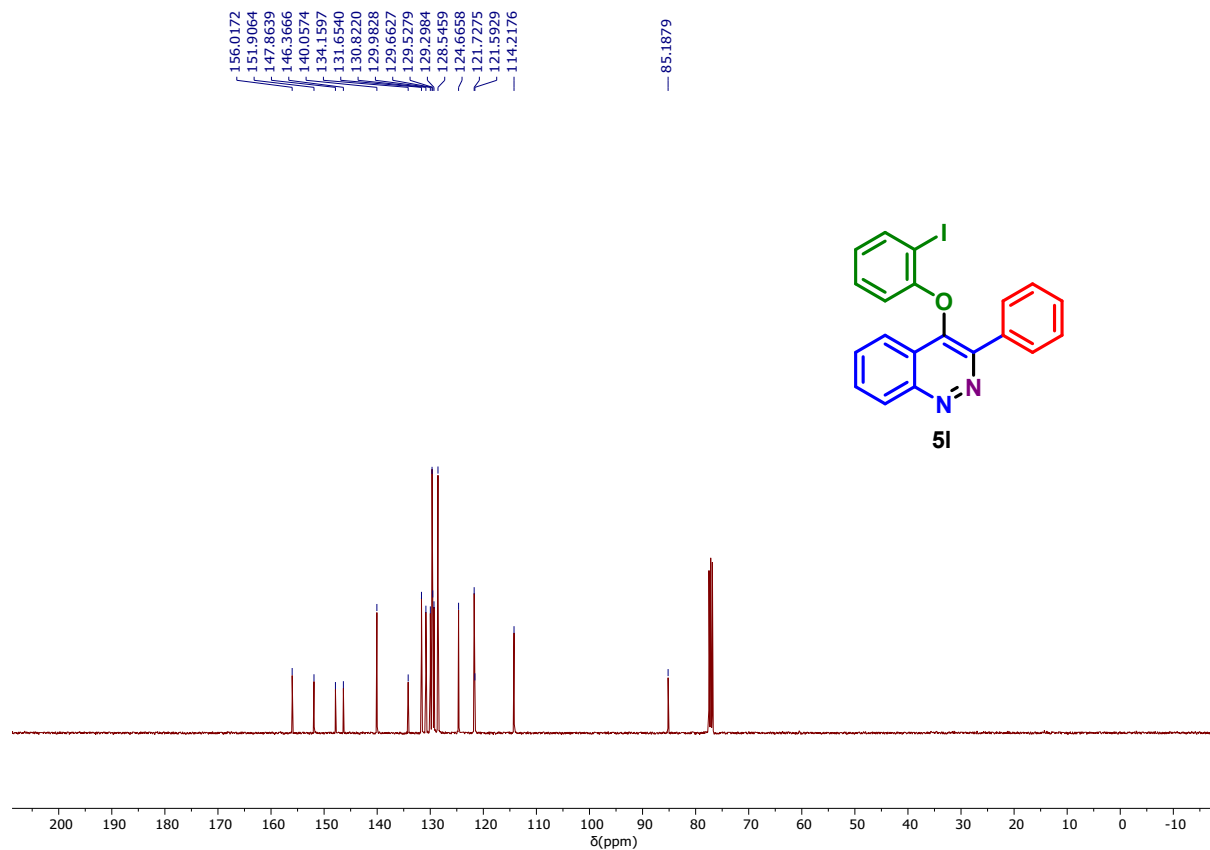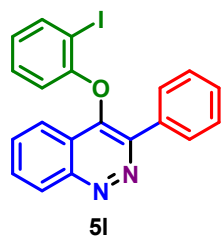

**$^1\text{H}$  and  $^{13}\text{C}\{^1\text{H}\}$  NMR ( $\text{CDCl}_3$ , 400 and 101 MHz) of compound 5m (<5% yield):**

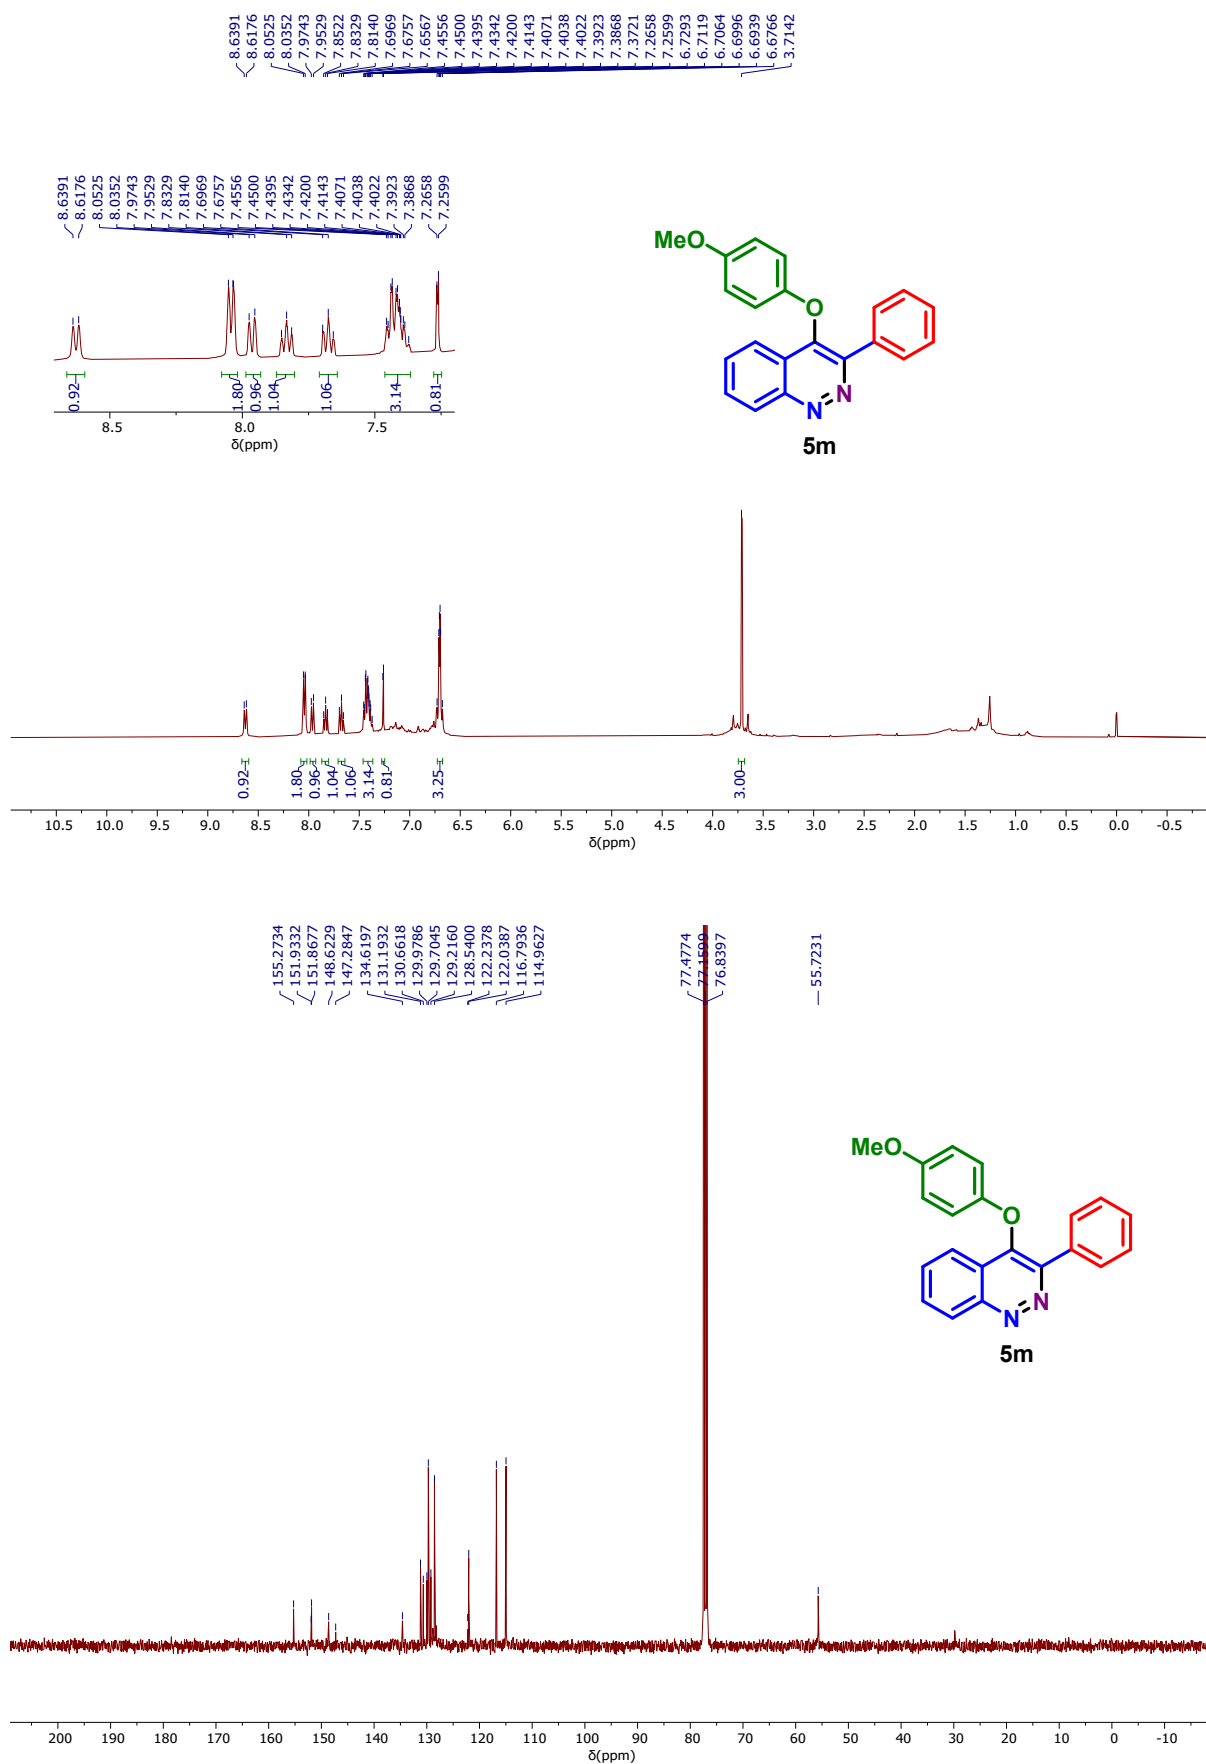

**$^1\text{H}$  and  $^{13}\text{C}\{^1\text{H}\}$  NMR (DMSO- $d_6$ , 400 and 101 MHz) of compound 6a:**

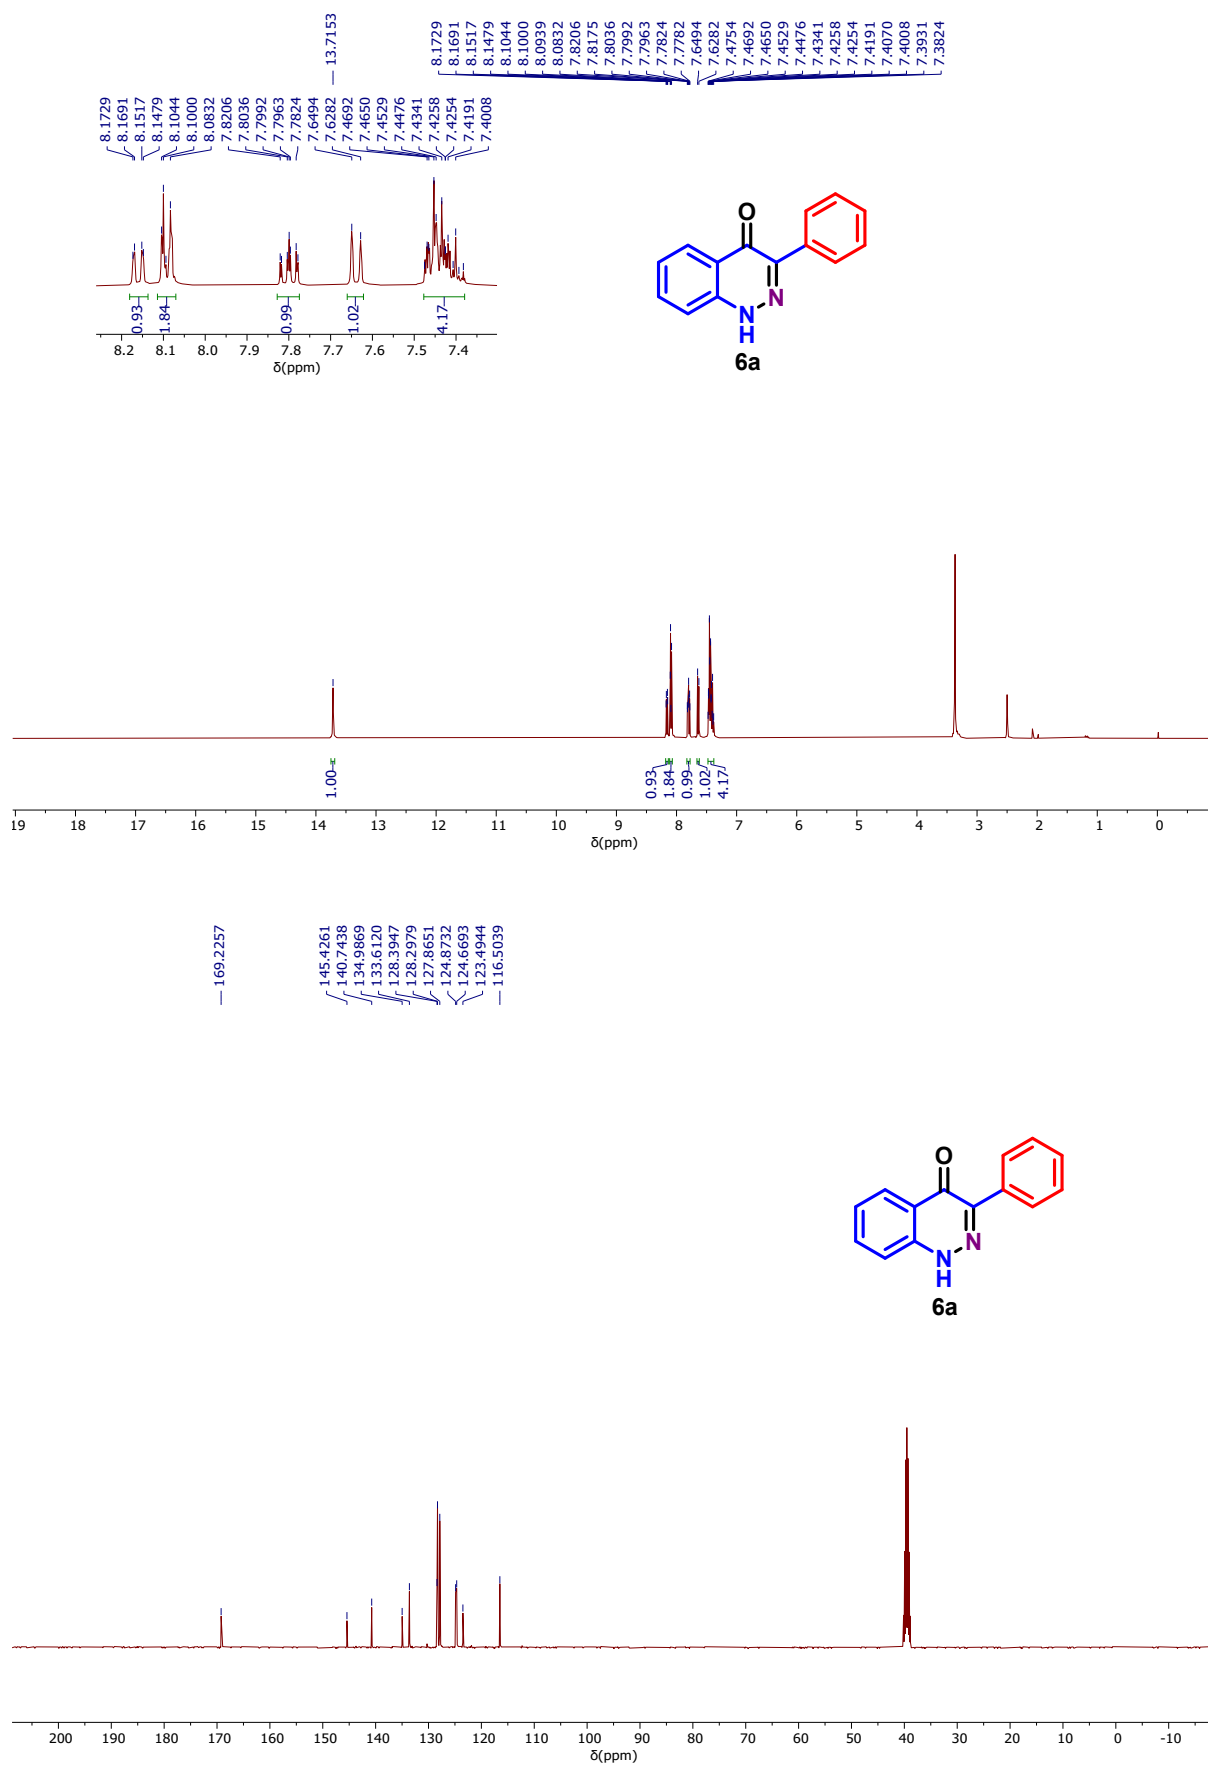

<sup>1</sup>H and <sup>13</sup>C{<sup>1</sup>H} NMR (DMSO-d<sub>6</sub>, 400 and 101 MHz) of compound 6b:

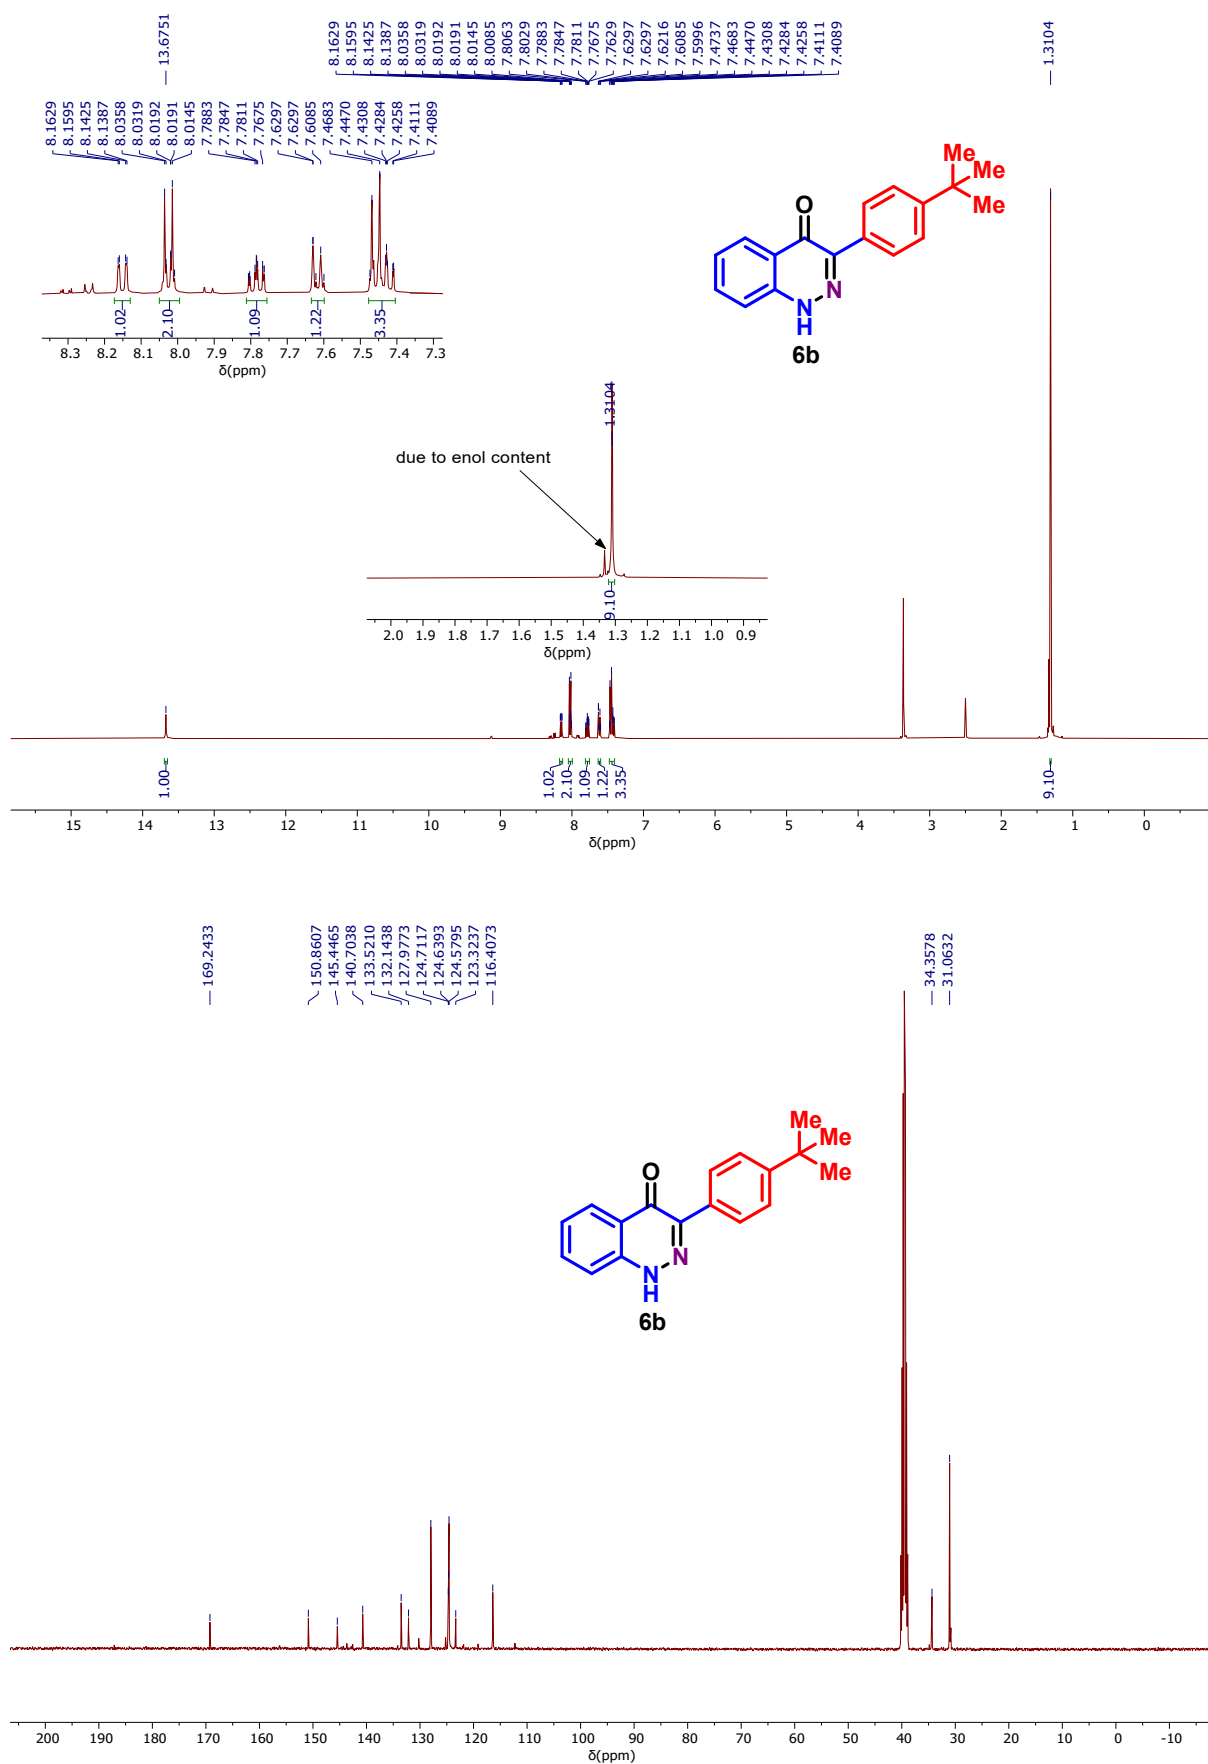

$^1\text{H}$ ,  $^{13}\text{C}\{^1\text{H}\}$  and  $^{19}\text{F}$  NMR (DMSO- $d_6$ , 400, 101 and 376 MHz) of compound 6d:

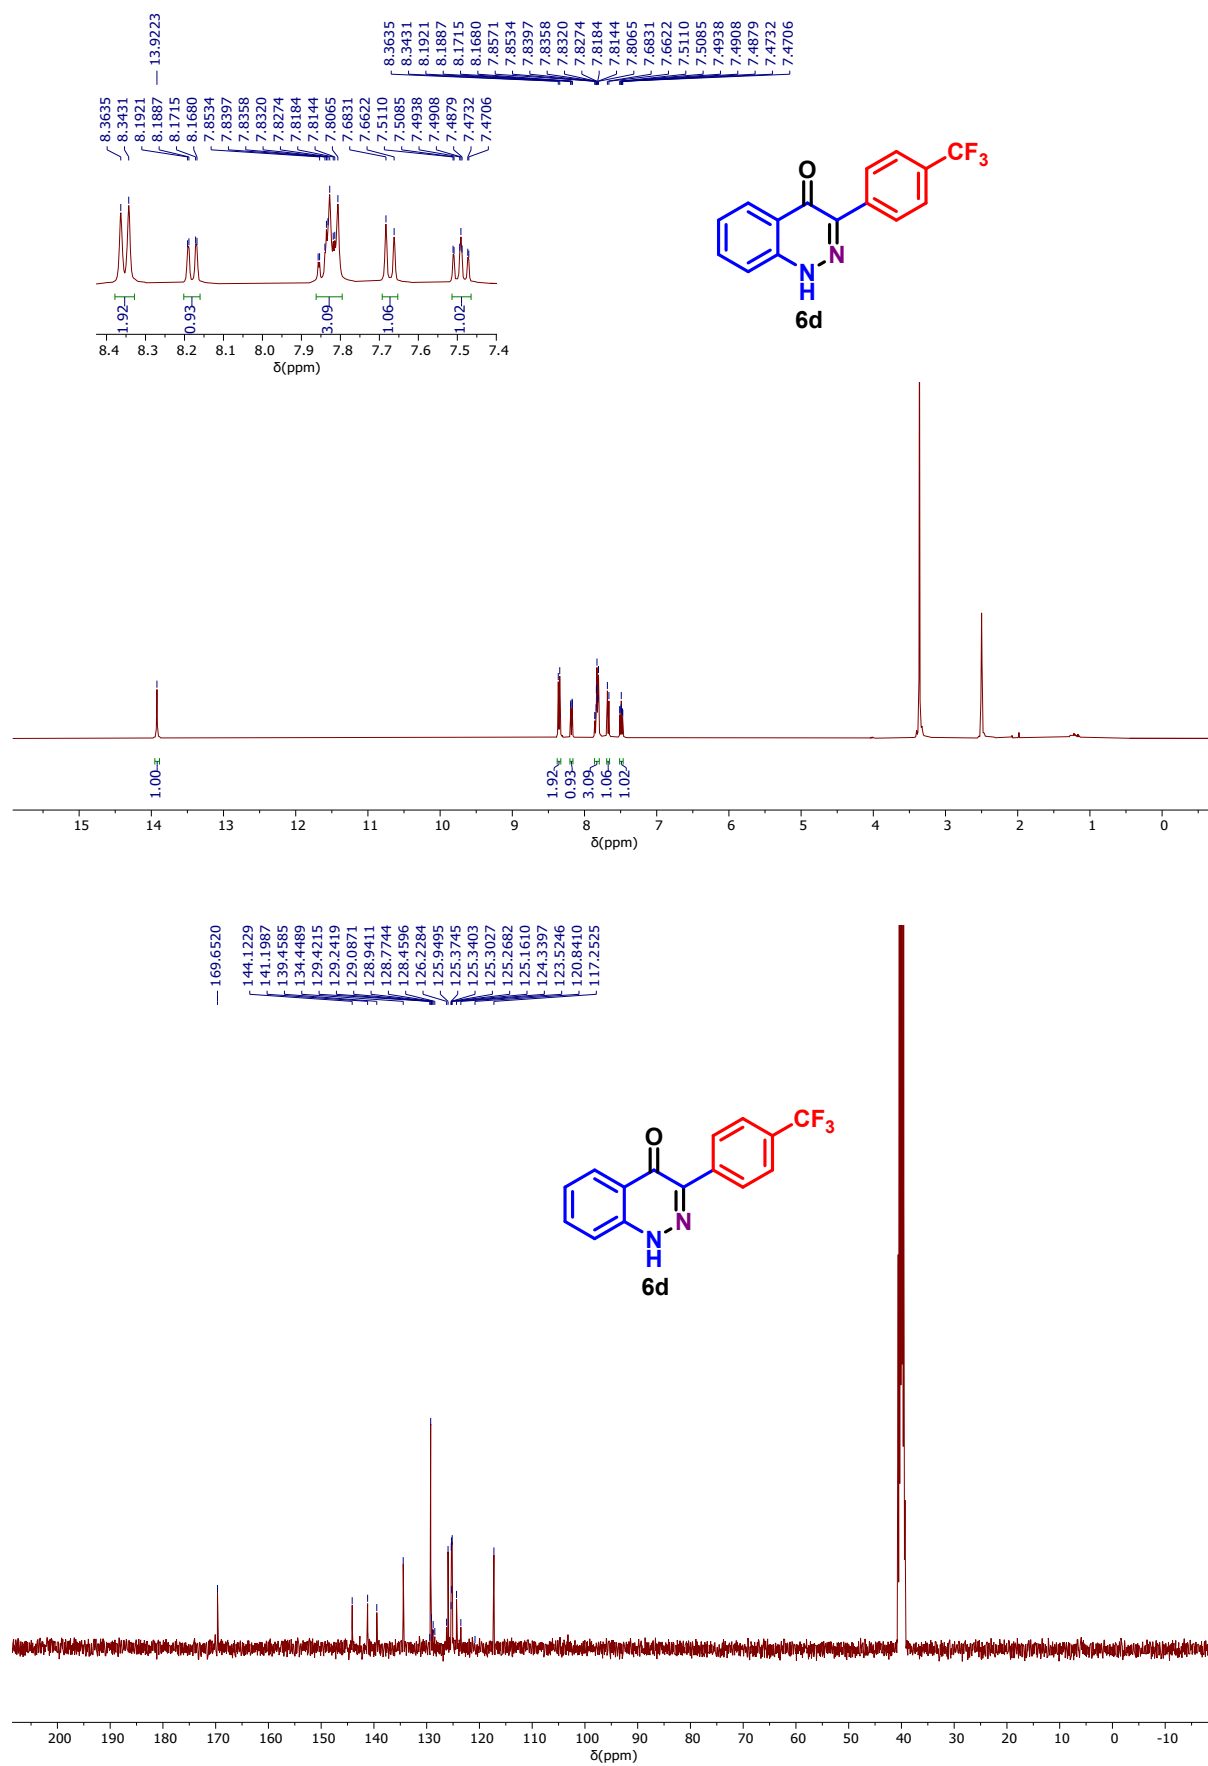

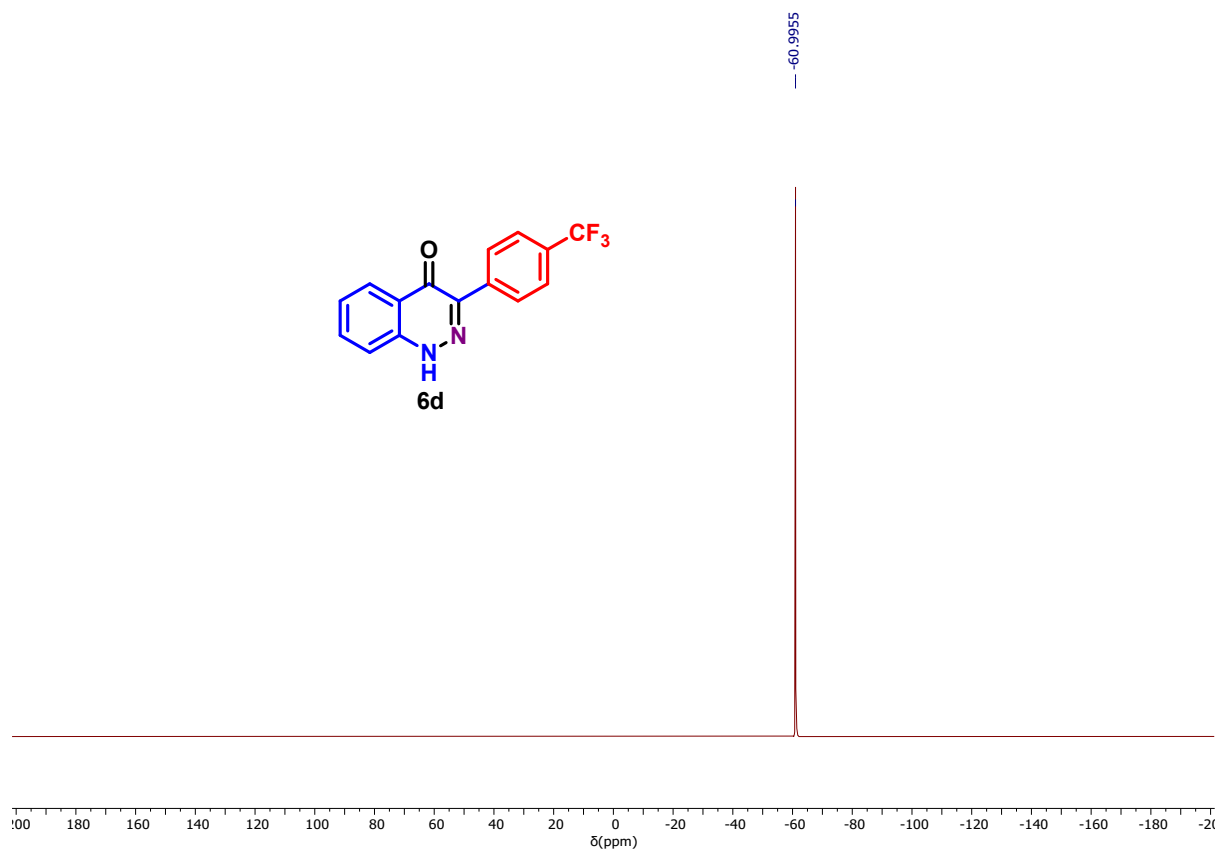

$^1\text{H}$  and  $^{13}\text{C}\{^1\text{H}\}$  NMR (DMSO- $d_6$ , 400 and 101 MHz) of compound **6e**:

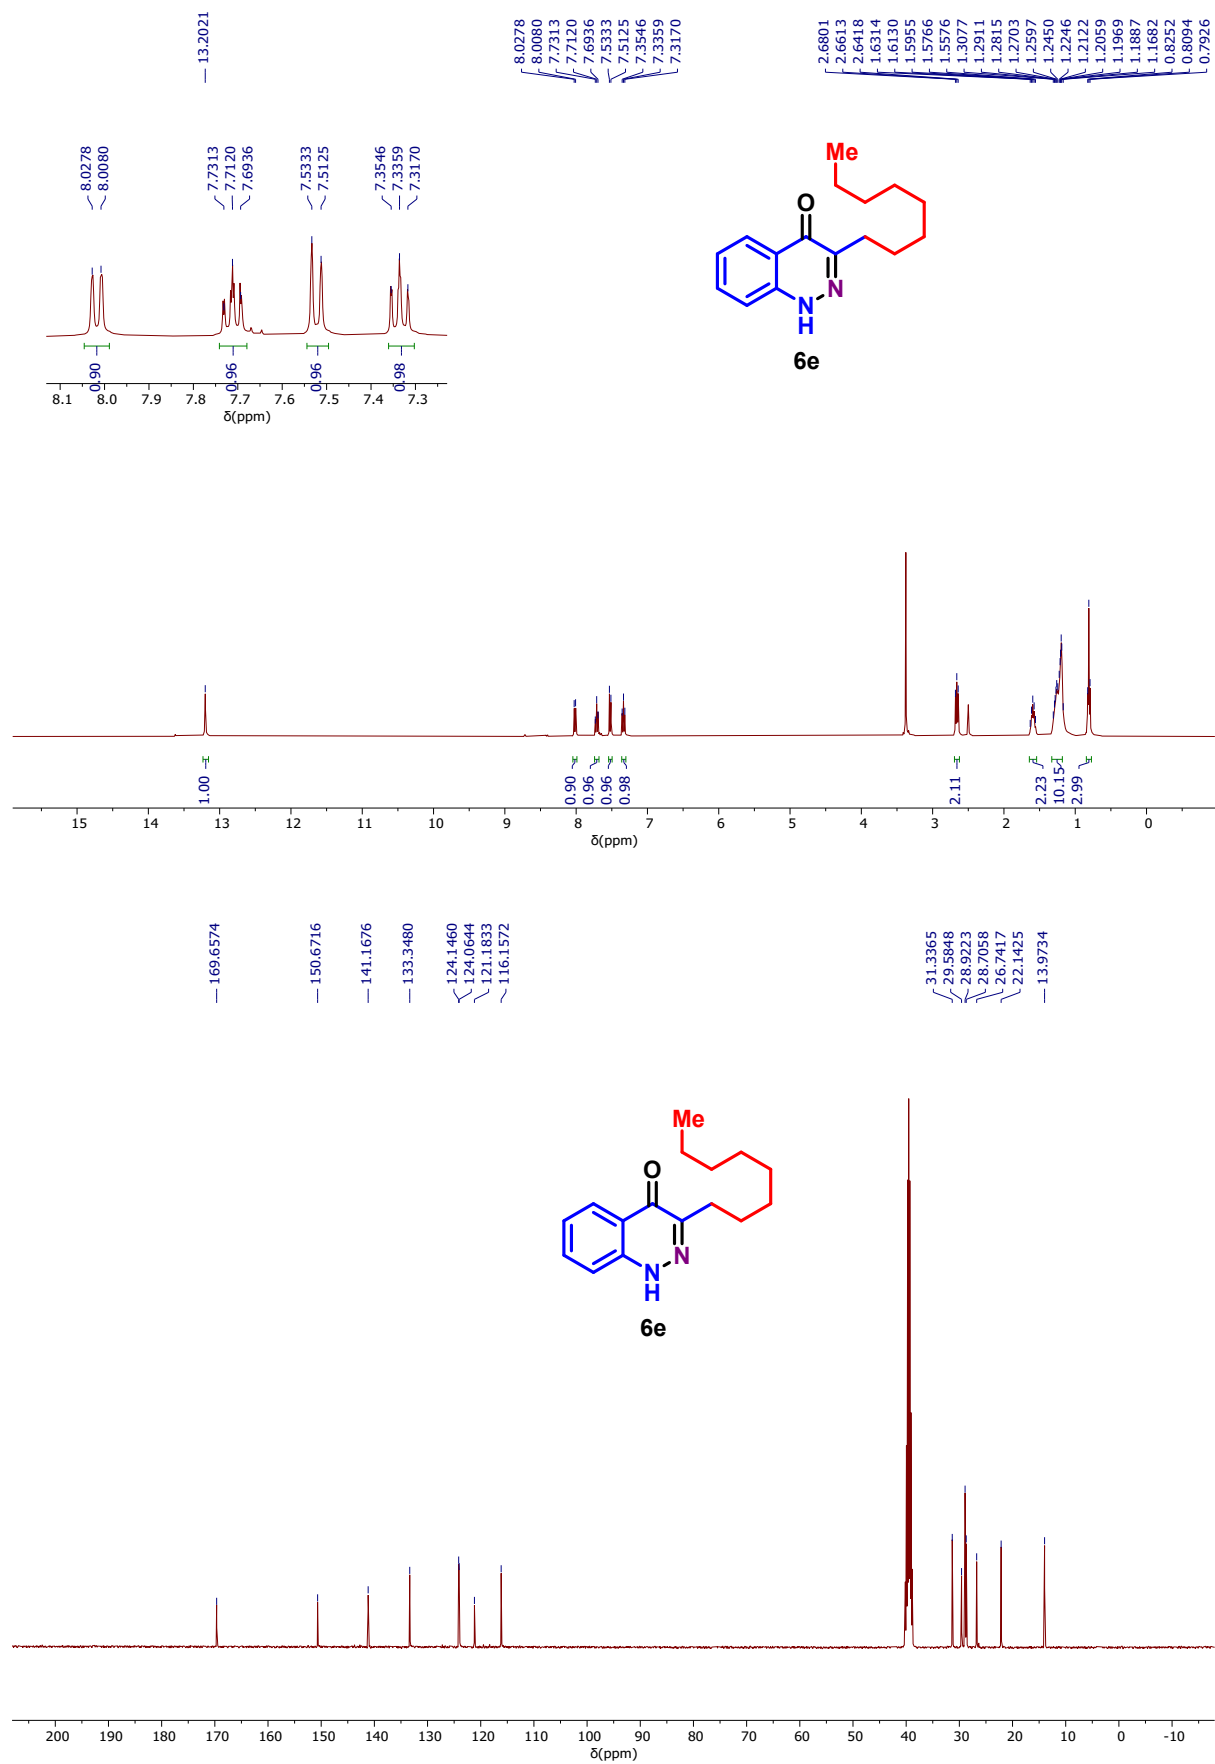

$^1\text{H}$  and  $^{13}\text{C}\{^1\text{H}\}$  NMR (DMSO- $d_6$ , 400 and 101 MHz) of compound 6f:

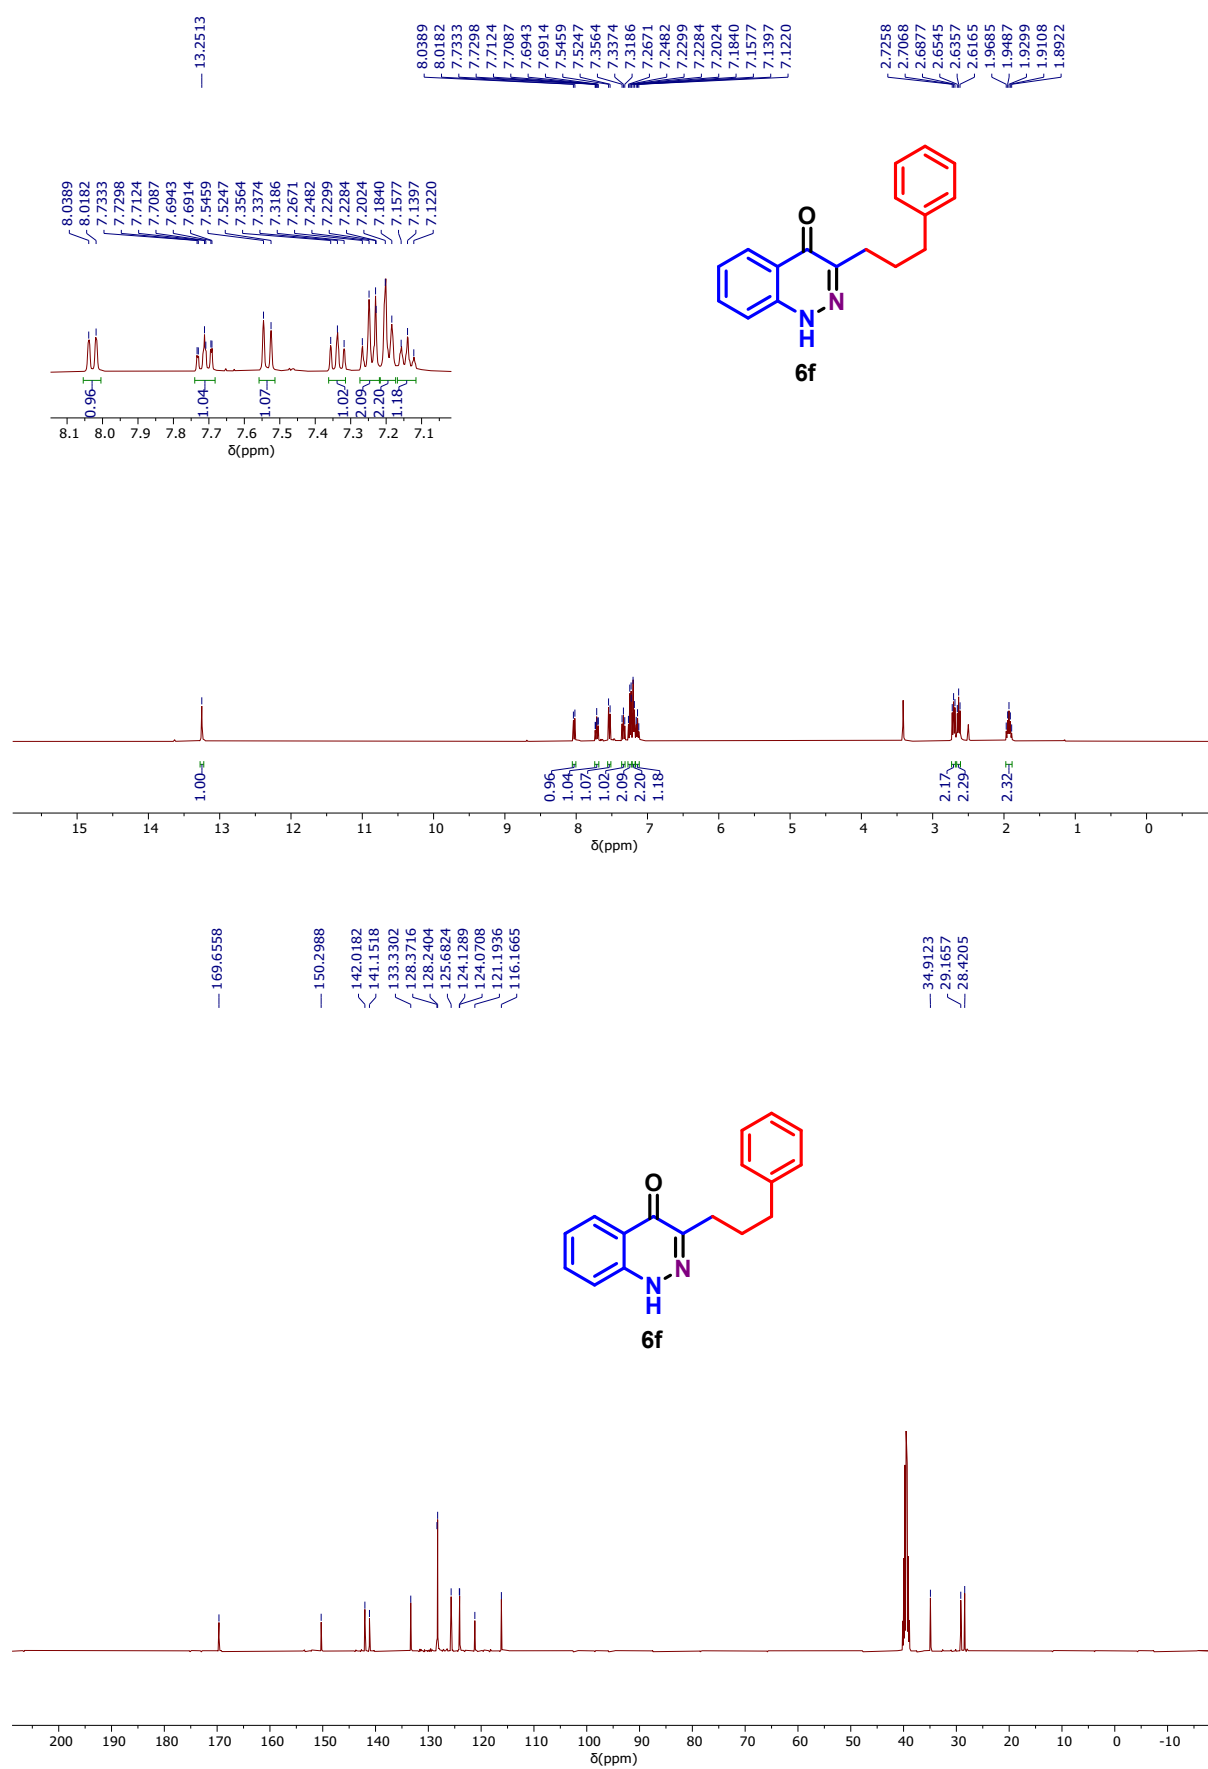



$^1\text{H}$  and  $^{13}\text{C}\{^1\text{H}\}$  NMR (DMSO- $d_6$ , 400 and 101 MHz) of compound **6g**:

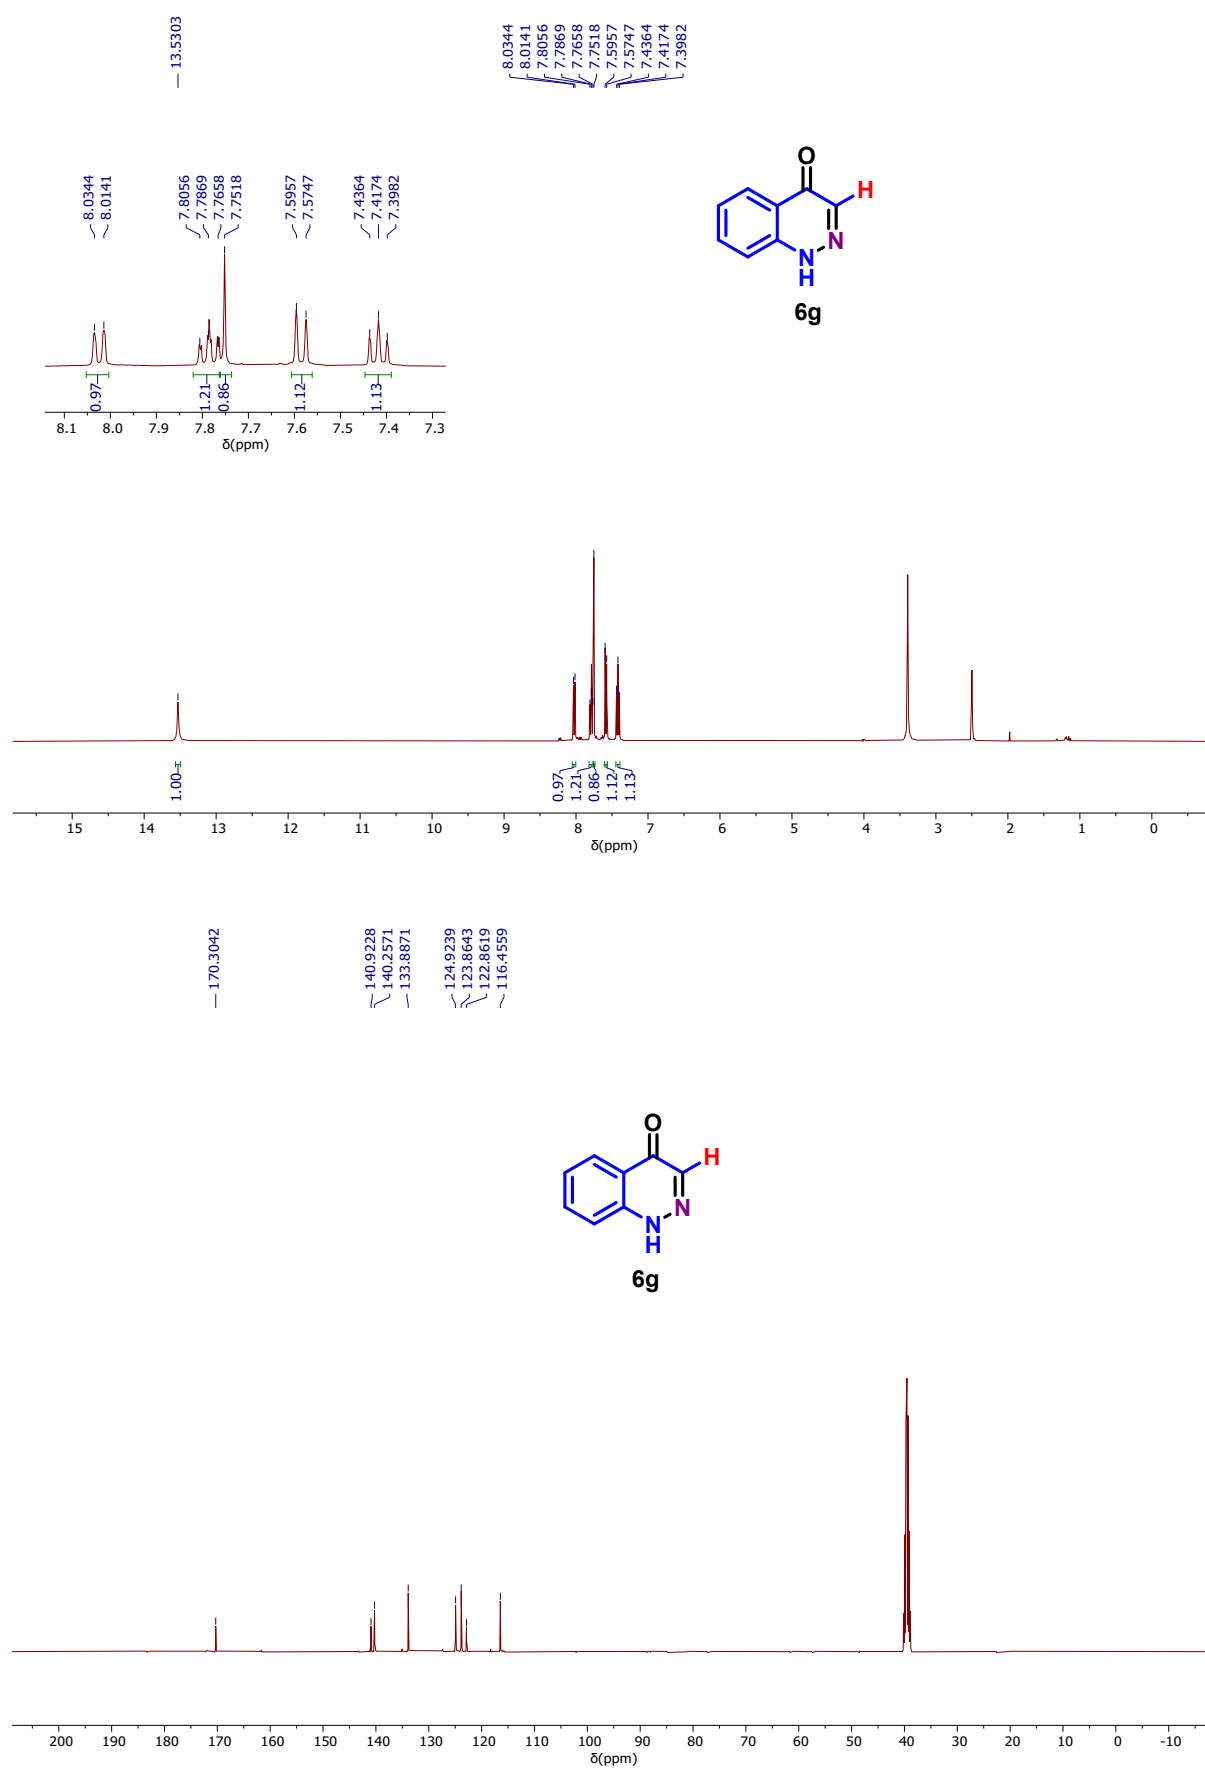

$^1\text{H}$  and  $^{13}\text{C}\{^1\text{H}\}$  NMR (DMSO- $d_6$ , 400 and 101 MHz) of compound 6h:

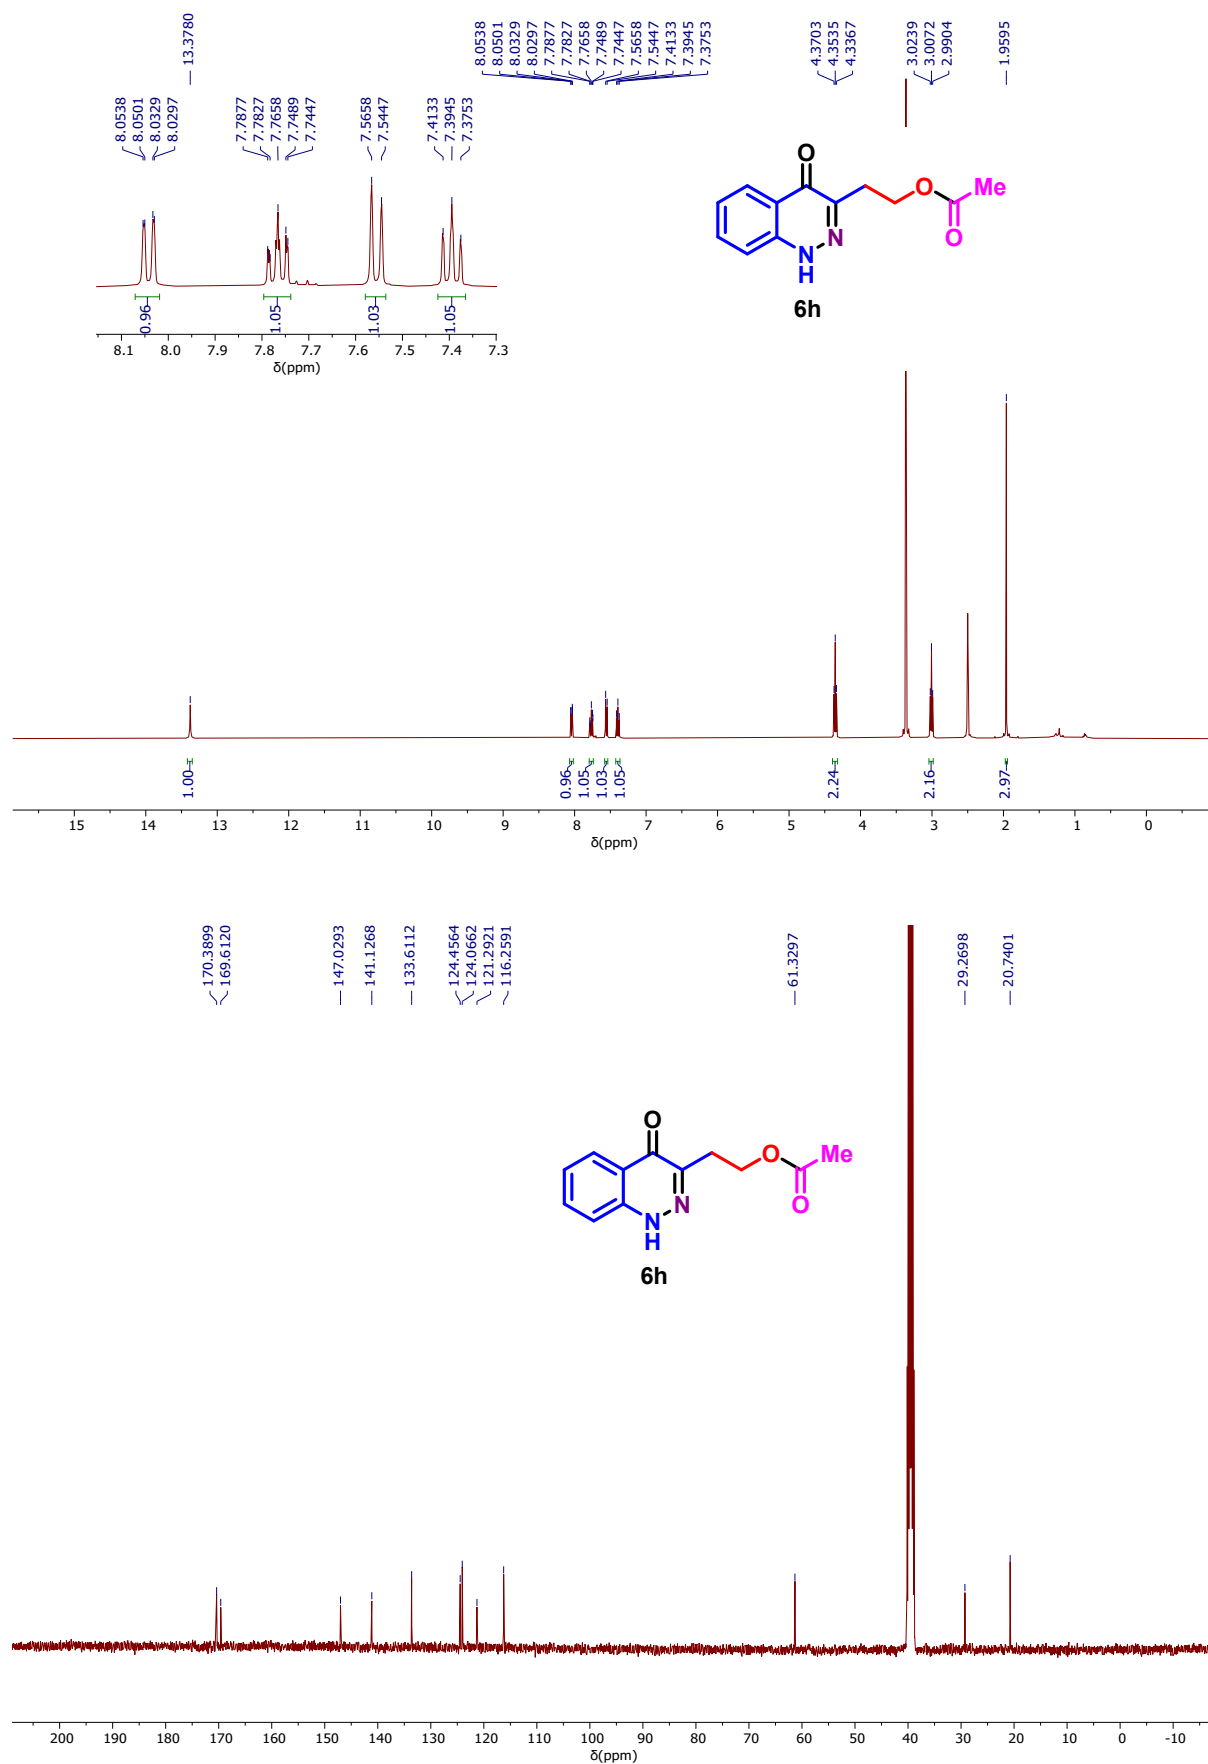

$^1\text{H}$  and  $^{13}\text{C}\{^1\text{H}\}$  NMR (DMSO- $d_6$ , 400 and 101 MHz) of compound 6h:

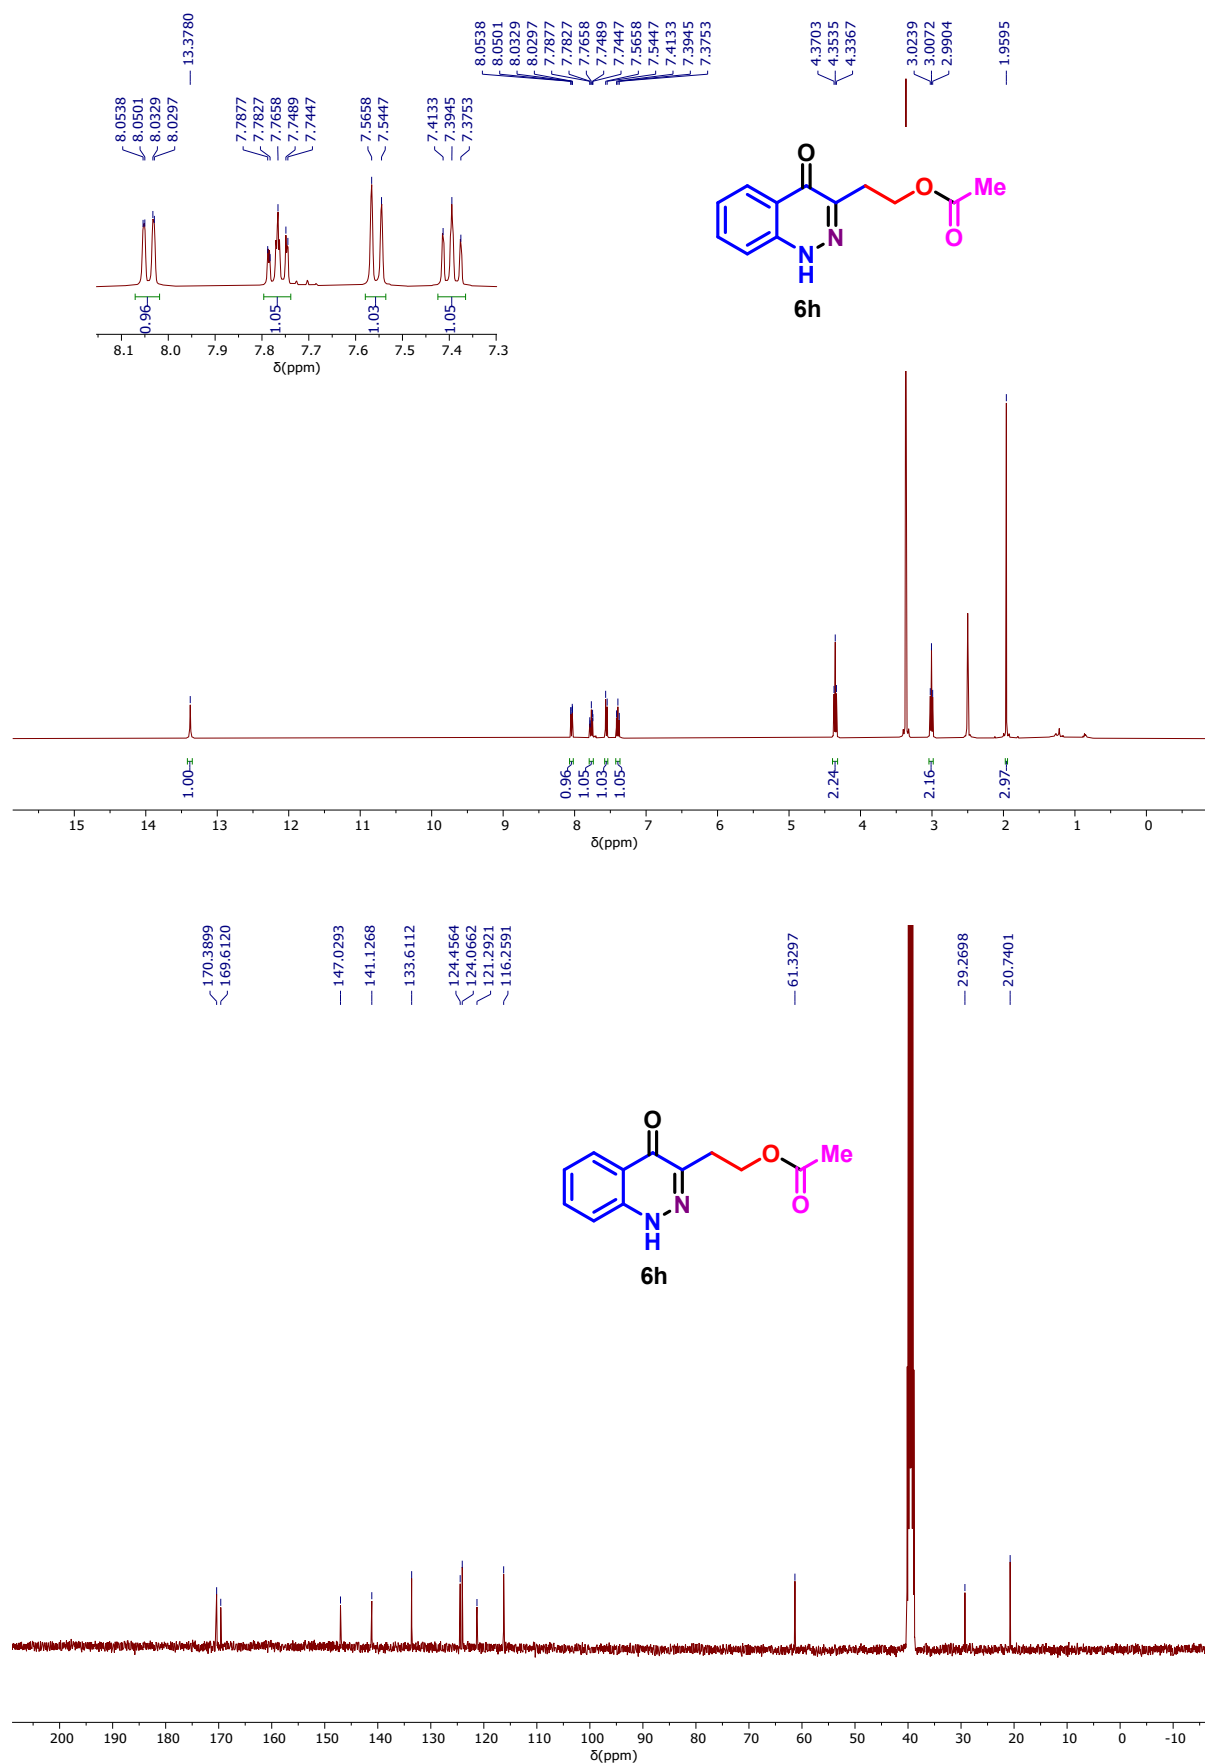

$^1\text{H}$  and  $^{13}\text{C}\{^1\text{H}\}$  NMR (DMSO- $d_6$ , 400 and 101 MHz) of compound **6i**:

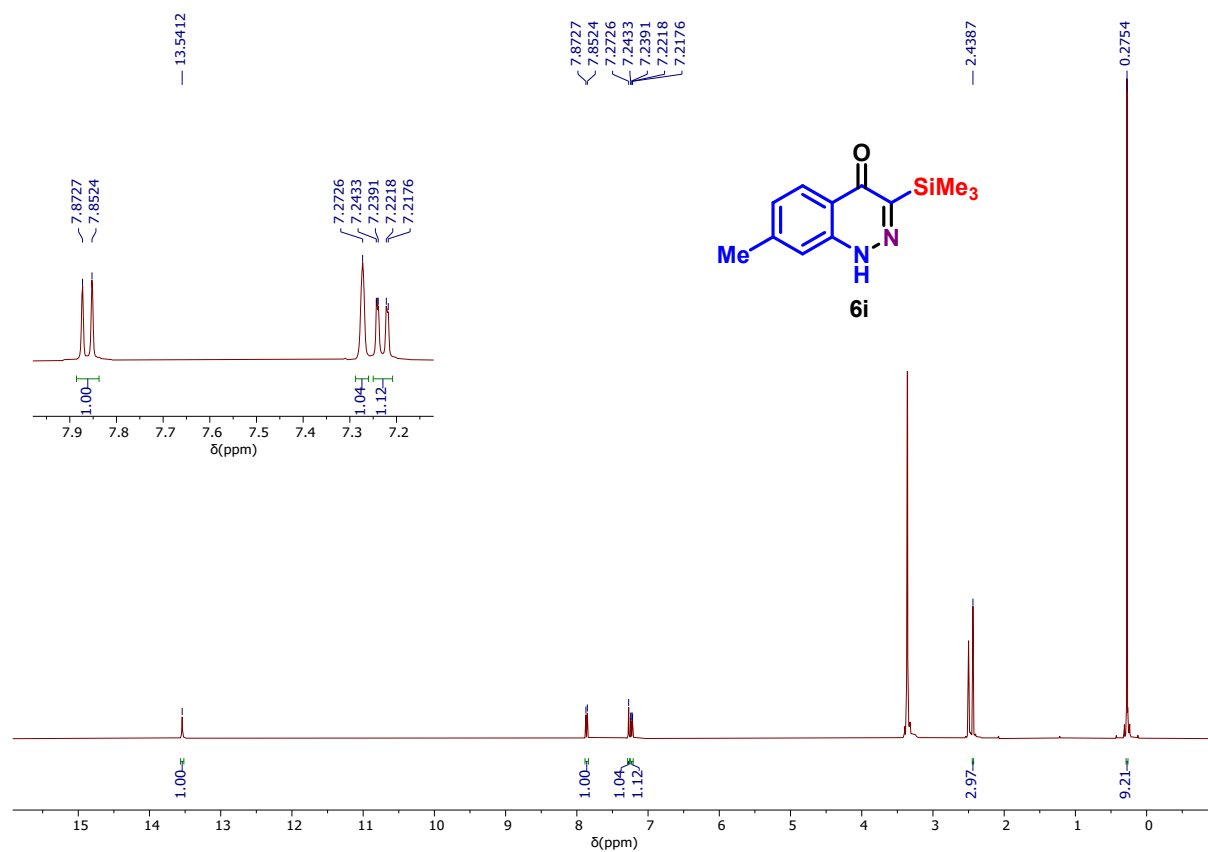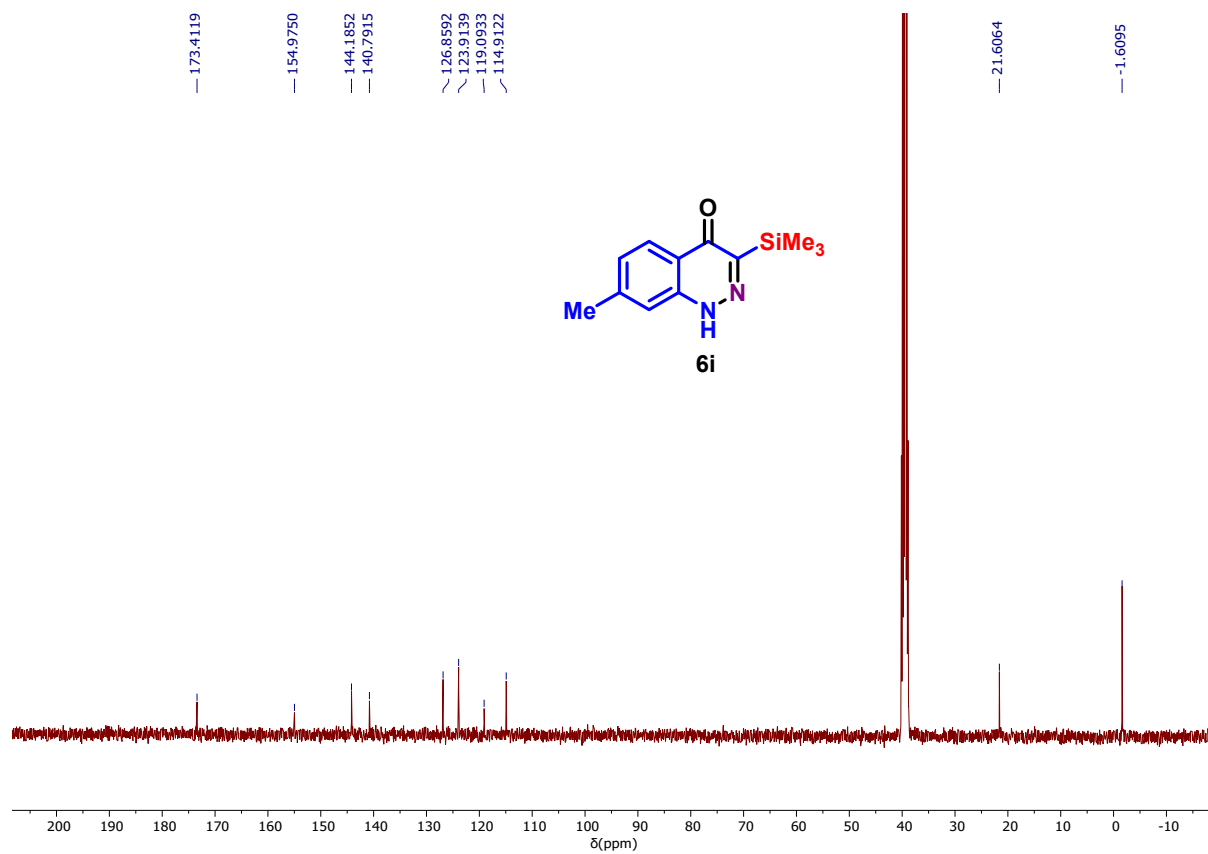

**$^1\text{H}$  and  $^{13}\text{C}\{^1\text{H}\}$  NMR (DMSO- $d_6$ , 400 and 101 MHz) of compound 6j:**

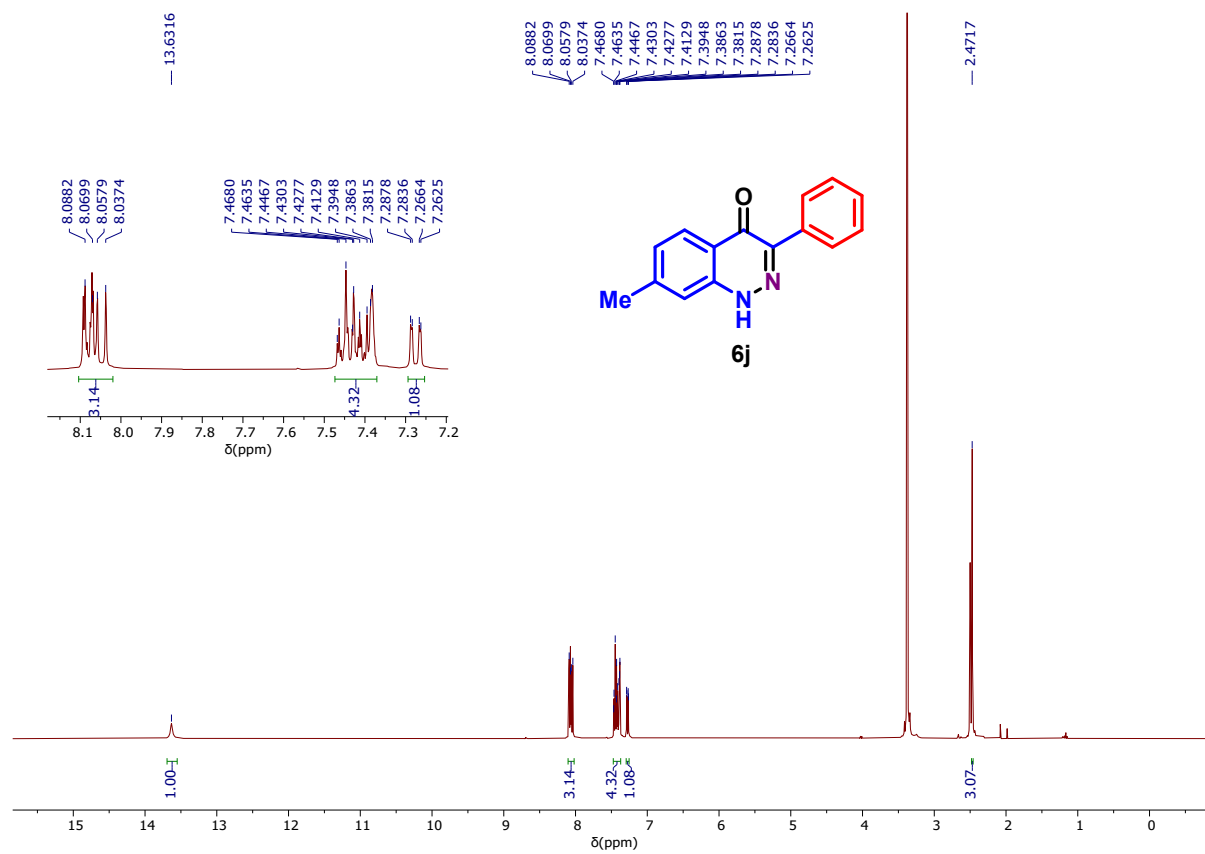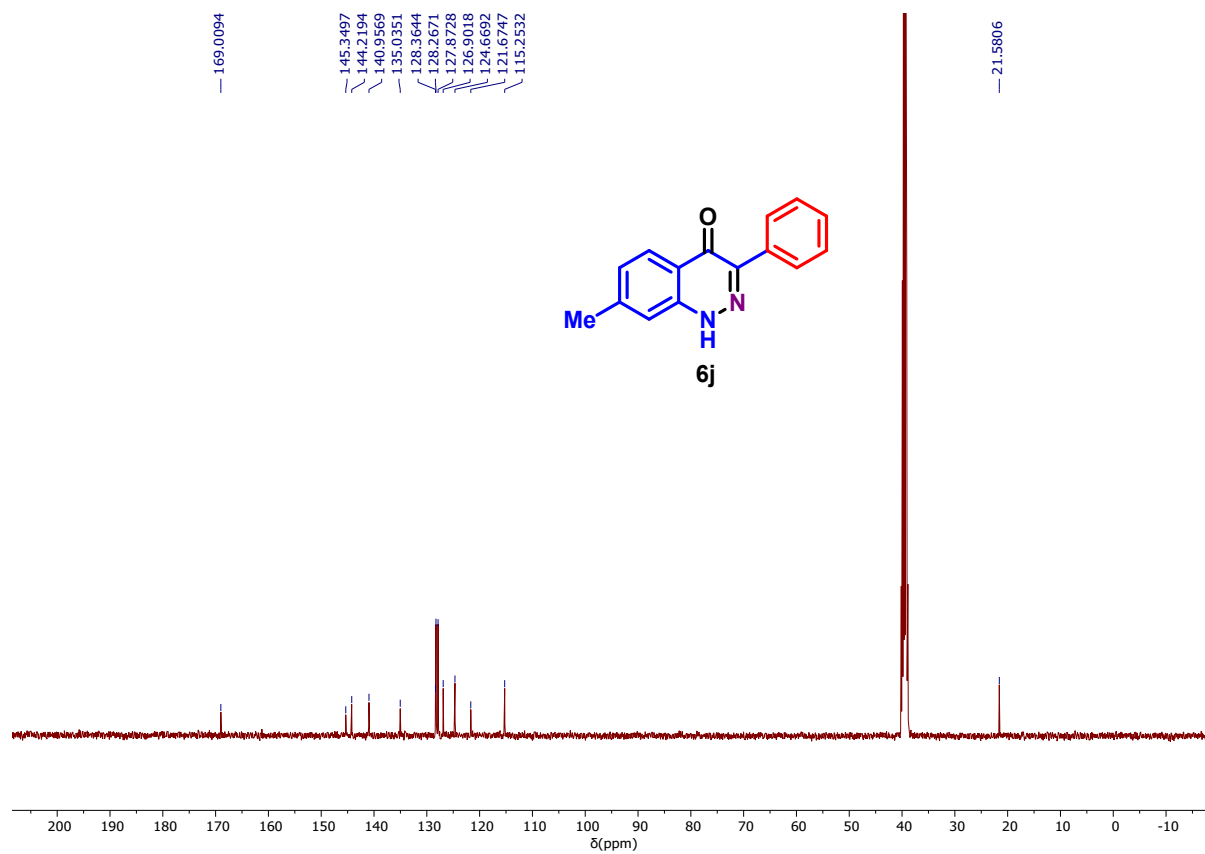

$^1\text{H}$  and  $^{13}\text{C}\{^1\text{H}\}$  NMR (DMSO- $d_6$ , 400 and 101 MHz) of compound 6k:

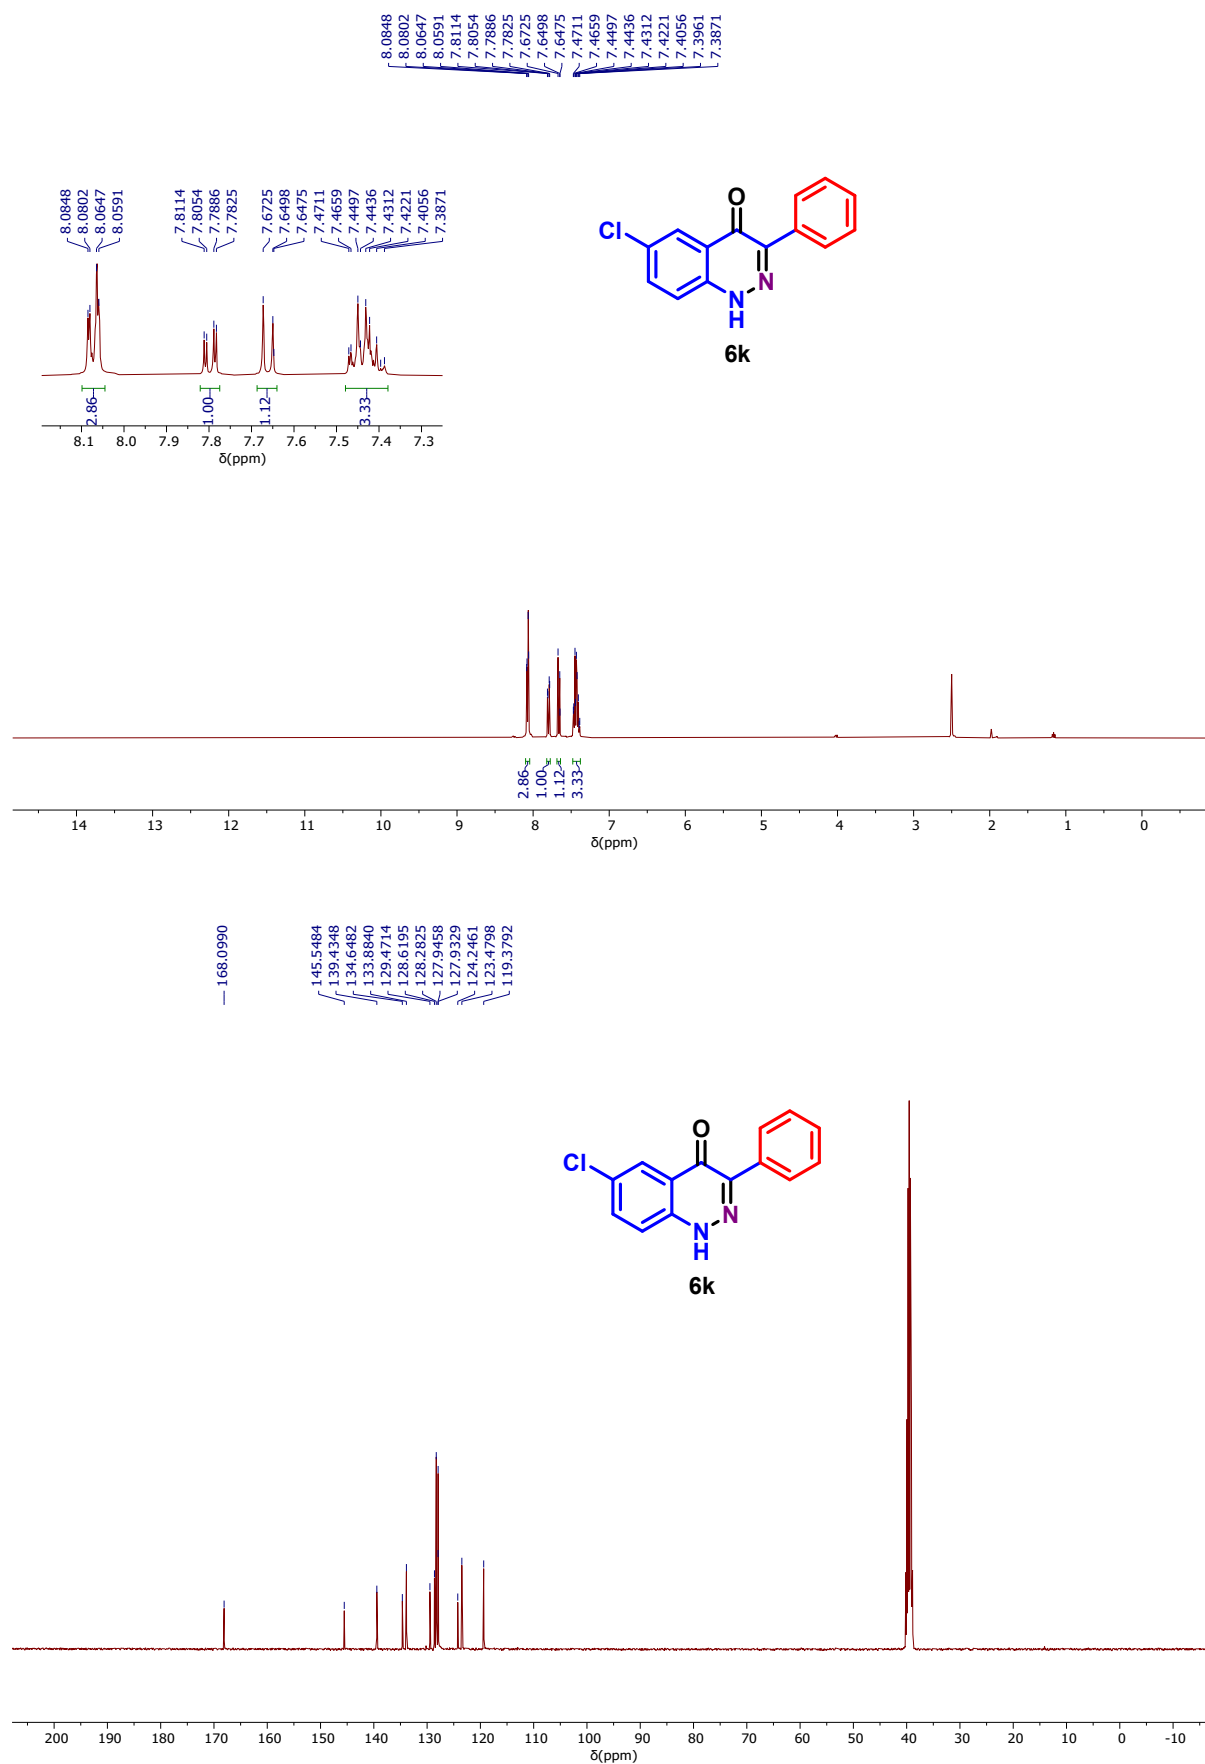

$^1\text{H}$  and  $^{13}\text{C}\{^1\text{H}\}$  NMR (DMSO- $d_6$ , 400 and 101 MHz) of compound 6I:

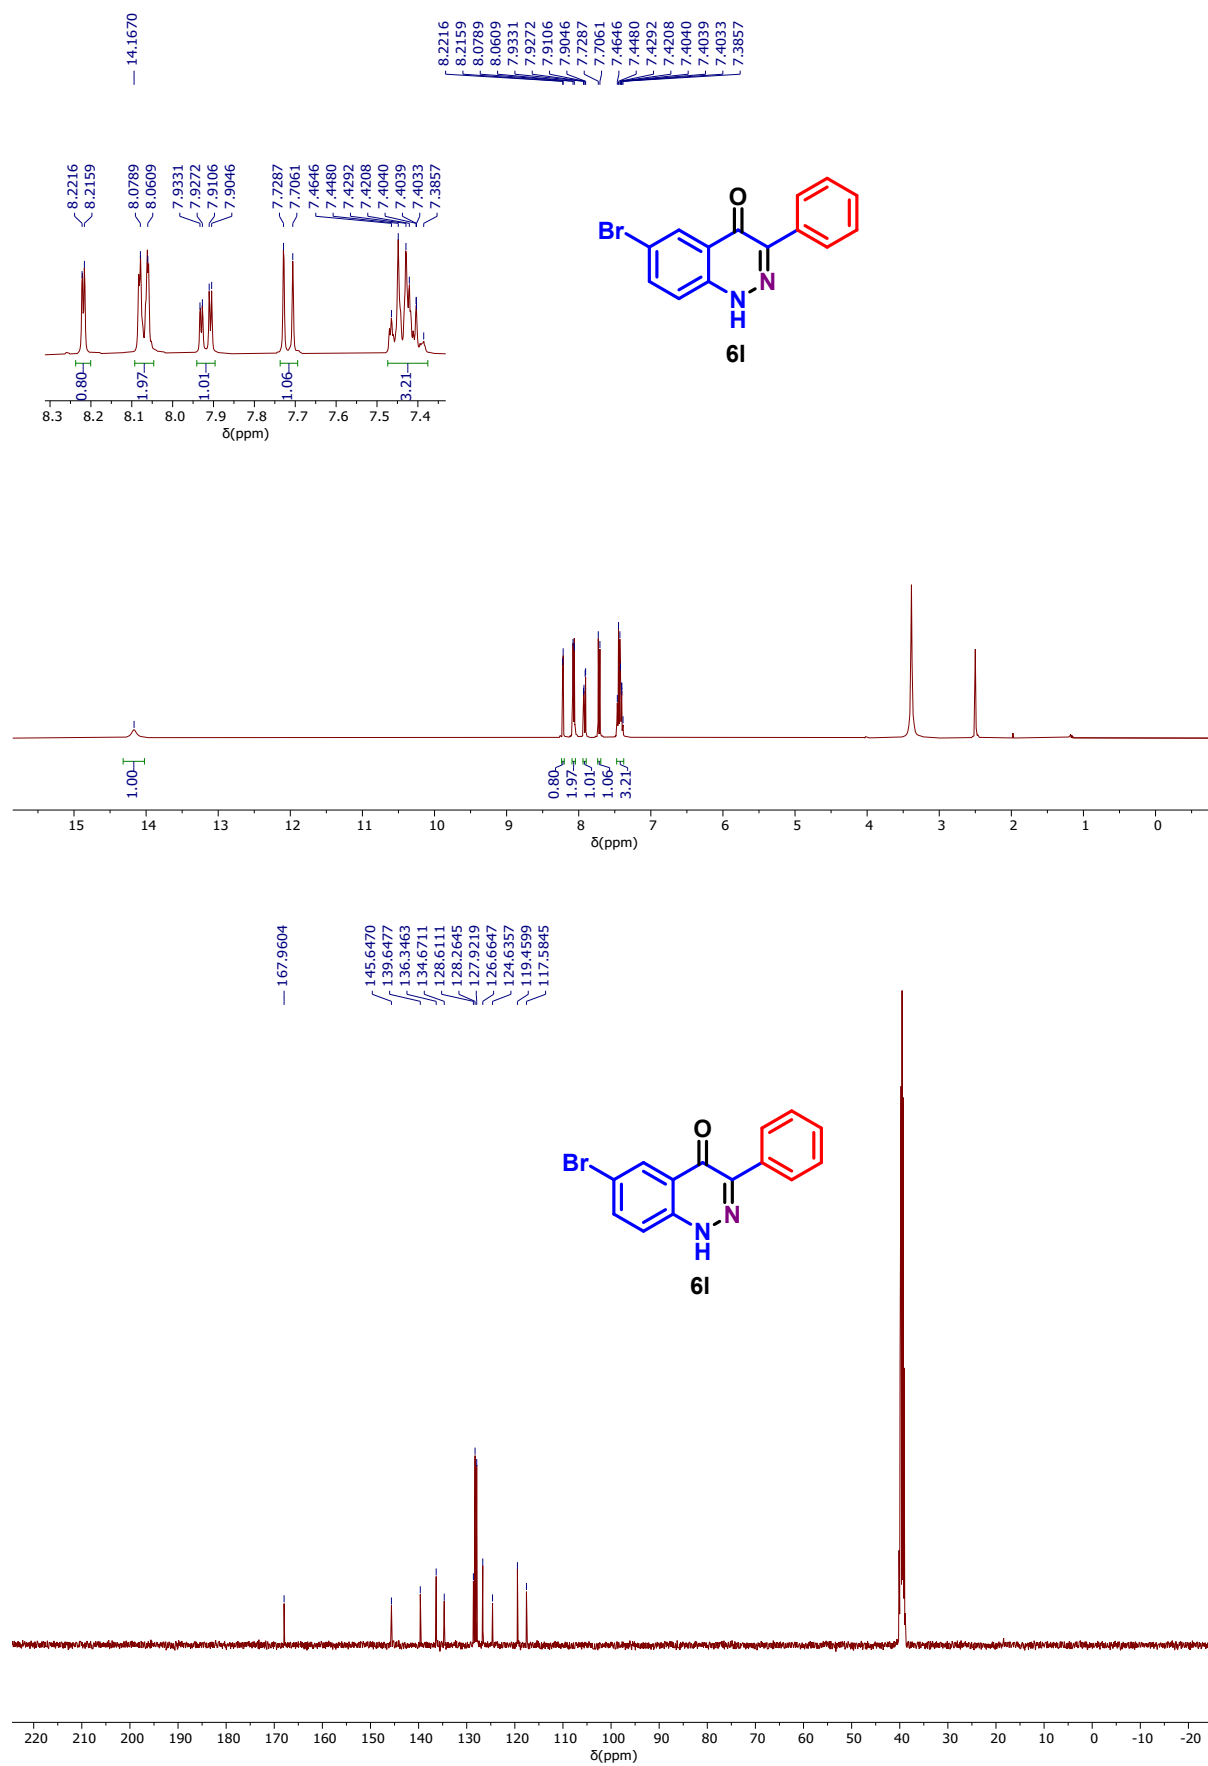

# $^1\text{H}$ and $^{13}\text{C}\{^1\text{H}\}$ NMR ( $\text{CDCl}_3$ , 400 and 101 MHz) of compound 7a:

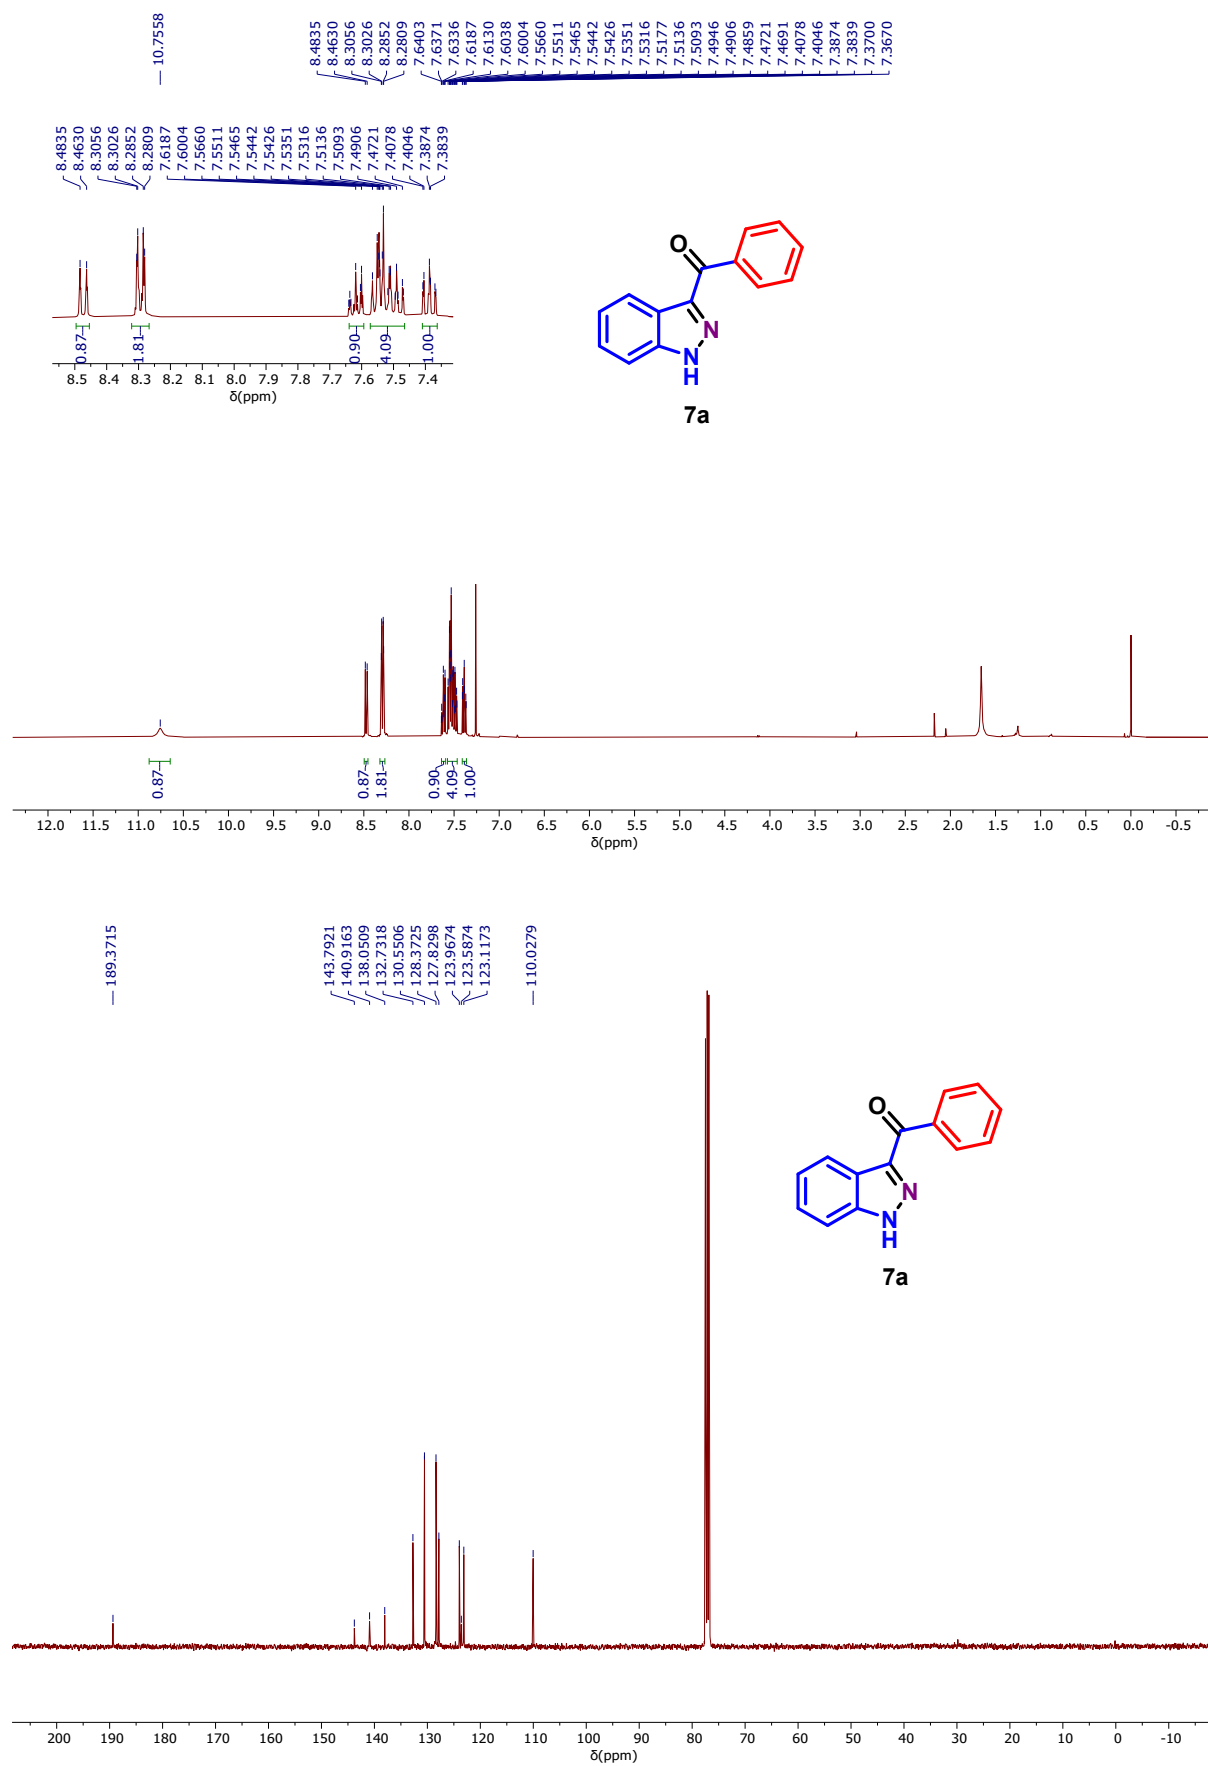



$^1\text{H}$  and  $^{13}\text{C}\{^1\text{H}\}$  NMR (DMSO- $d_6$ , 400 and 101 MHz) of compound **7b**:

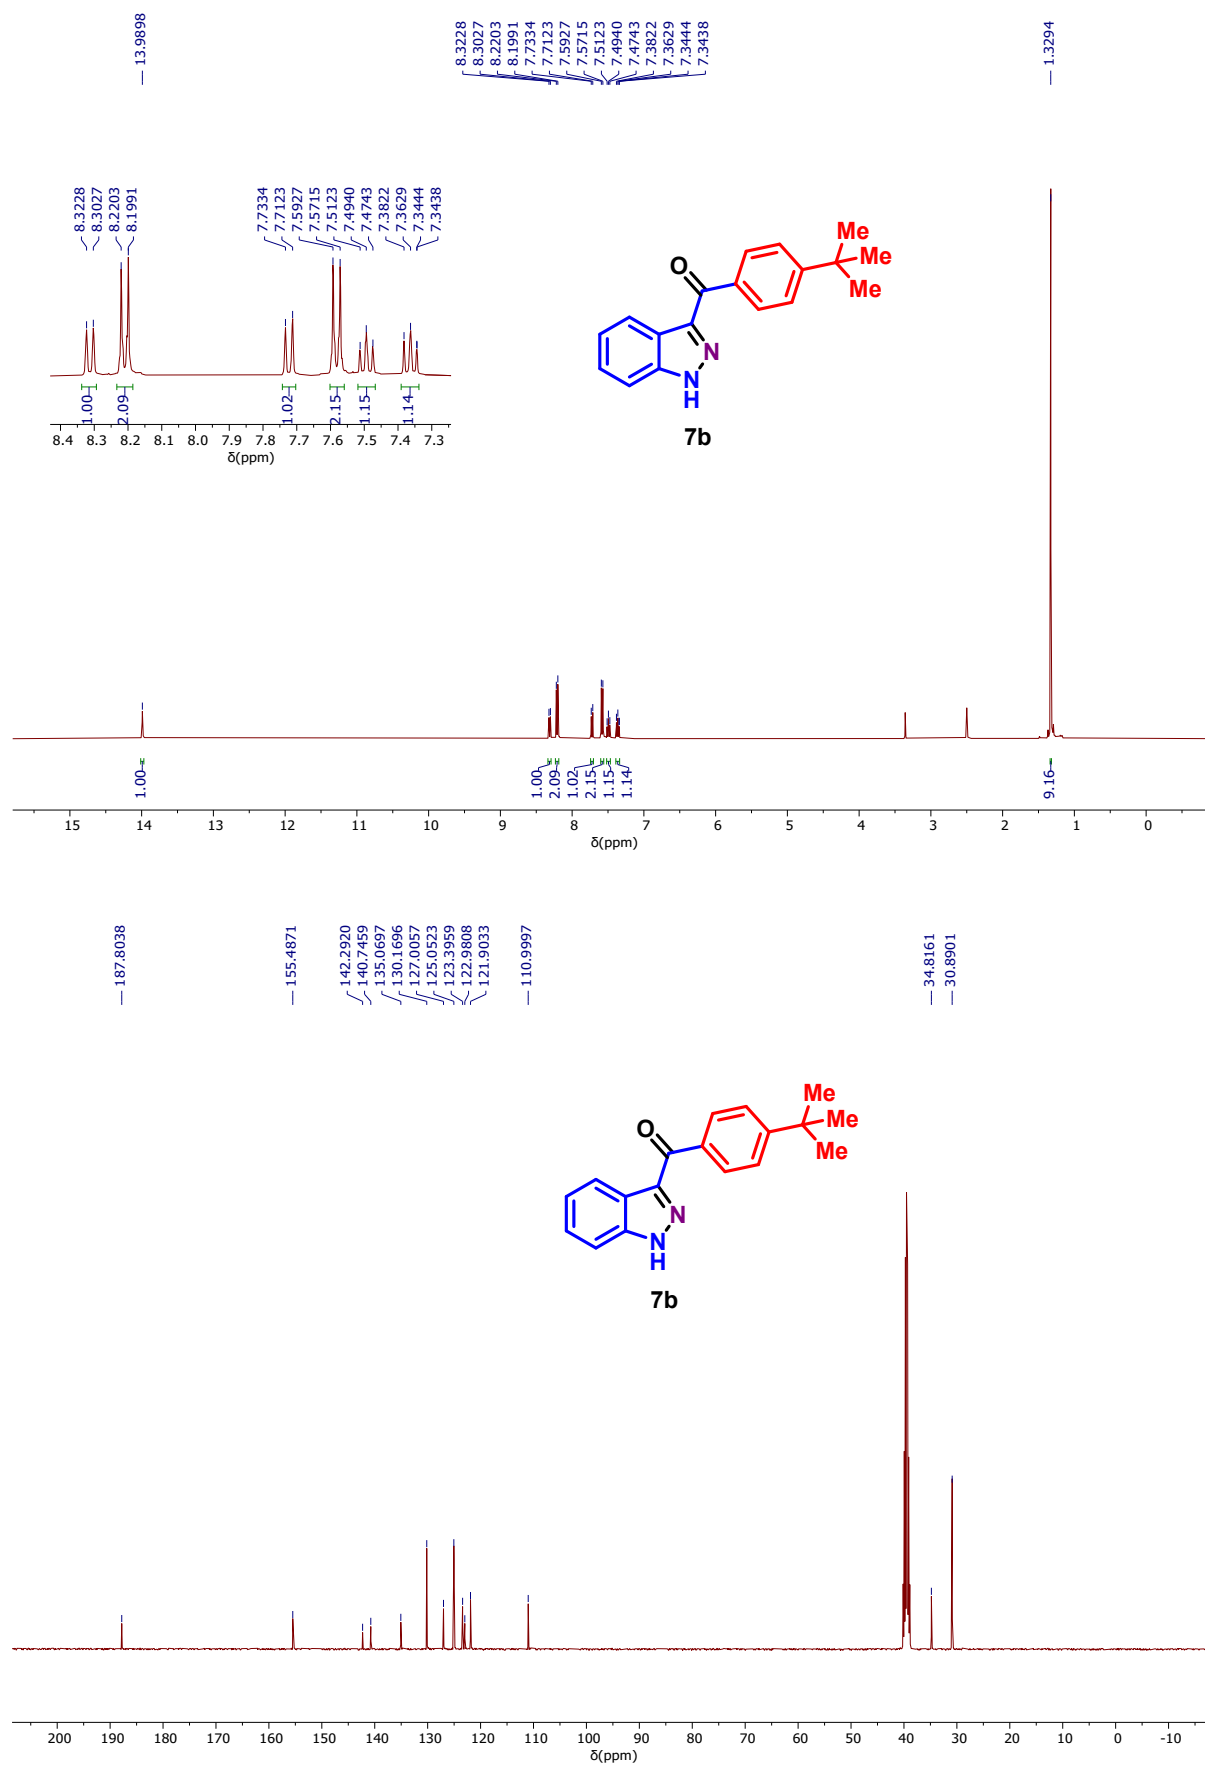

$^1\text{H}$  and  $^{13}\text{C}\{^1\text{H}\}$  NMR (DMSO- $d_6$ , 400 and 101 MHz) of compound **7c**:

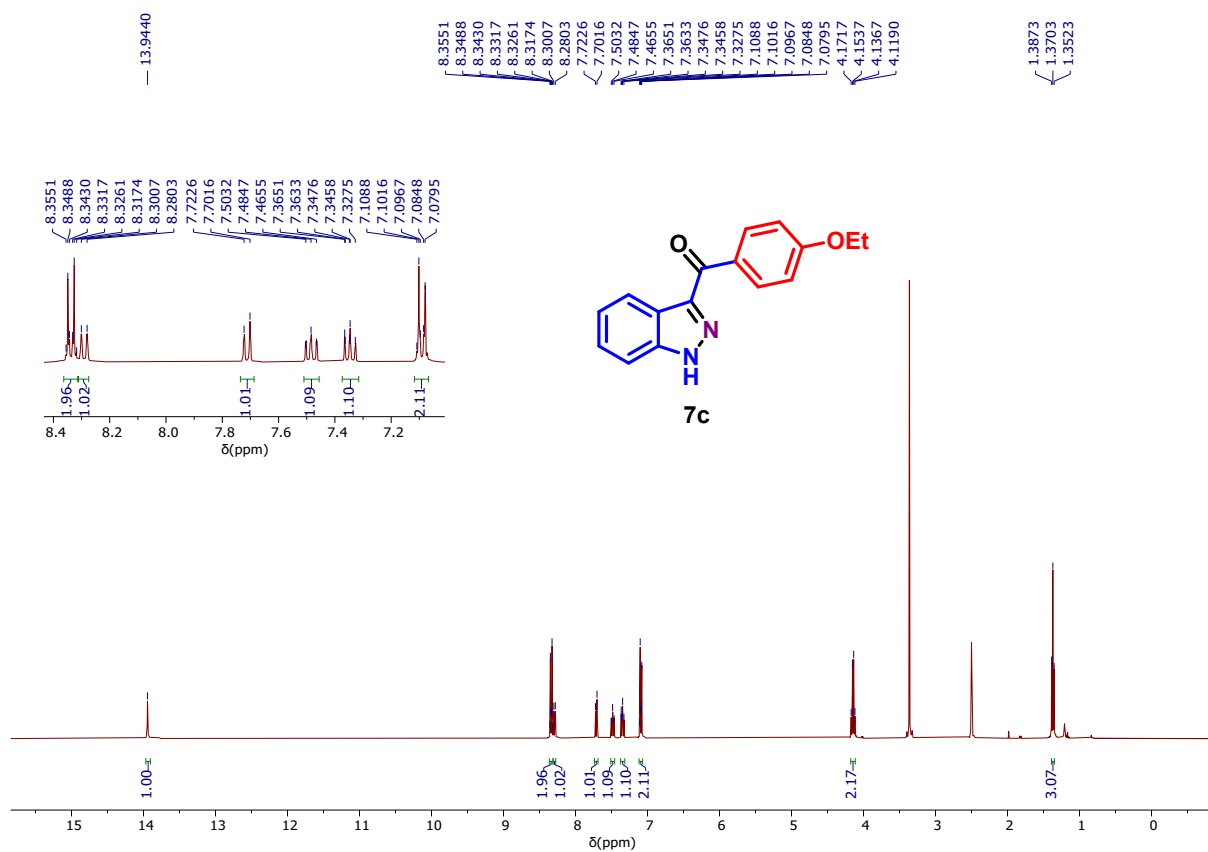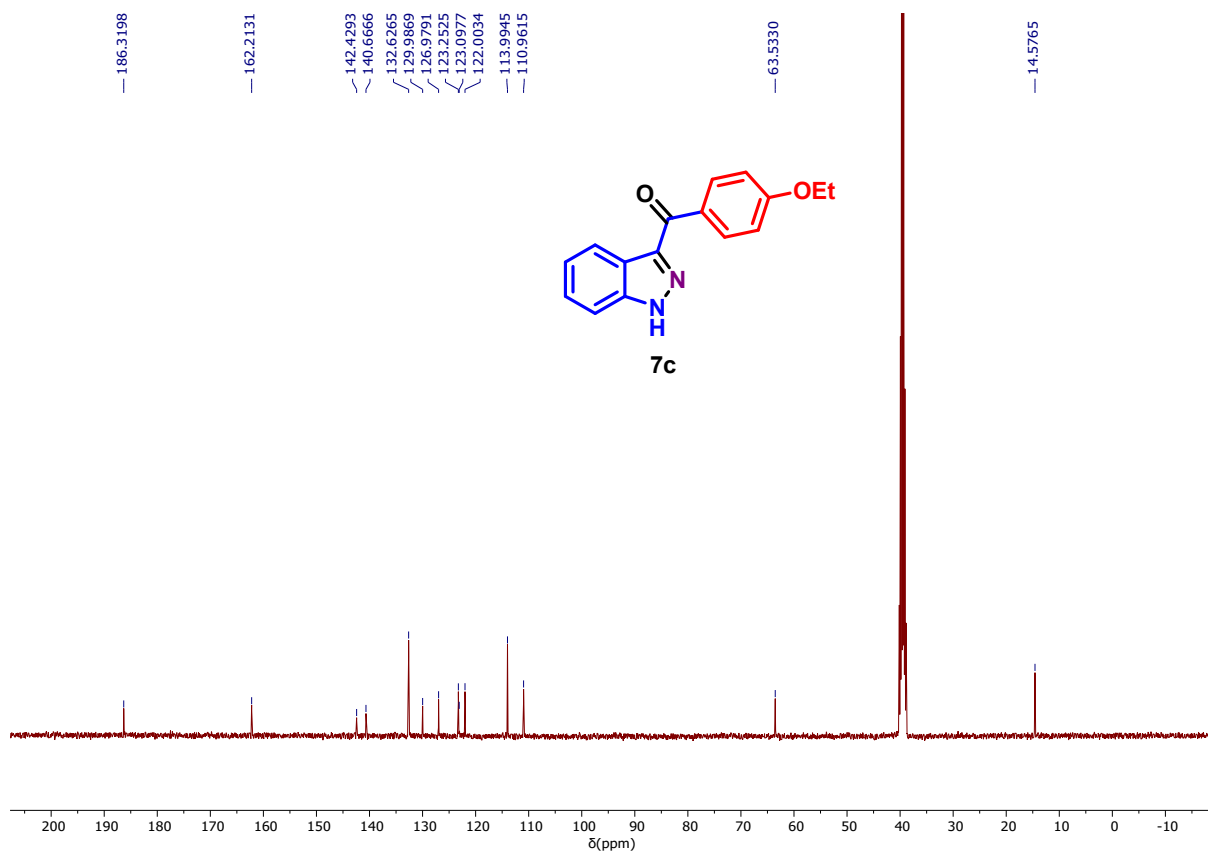

**$^1\text{H}$  and  $^{13}\text{C}\{^1\text{H}\}$  NMR (DMSO- $d_6$ , 400 and 101 MHz) of compound 7d:**

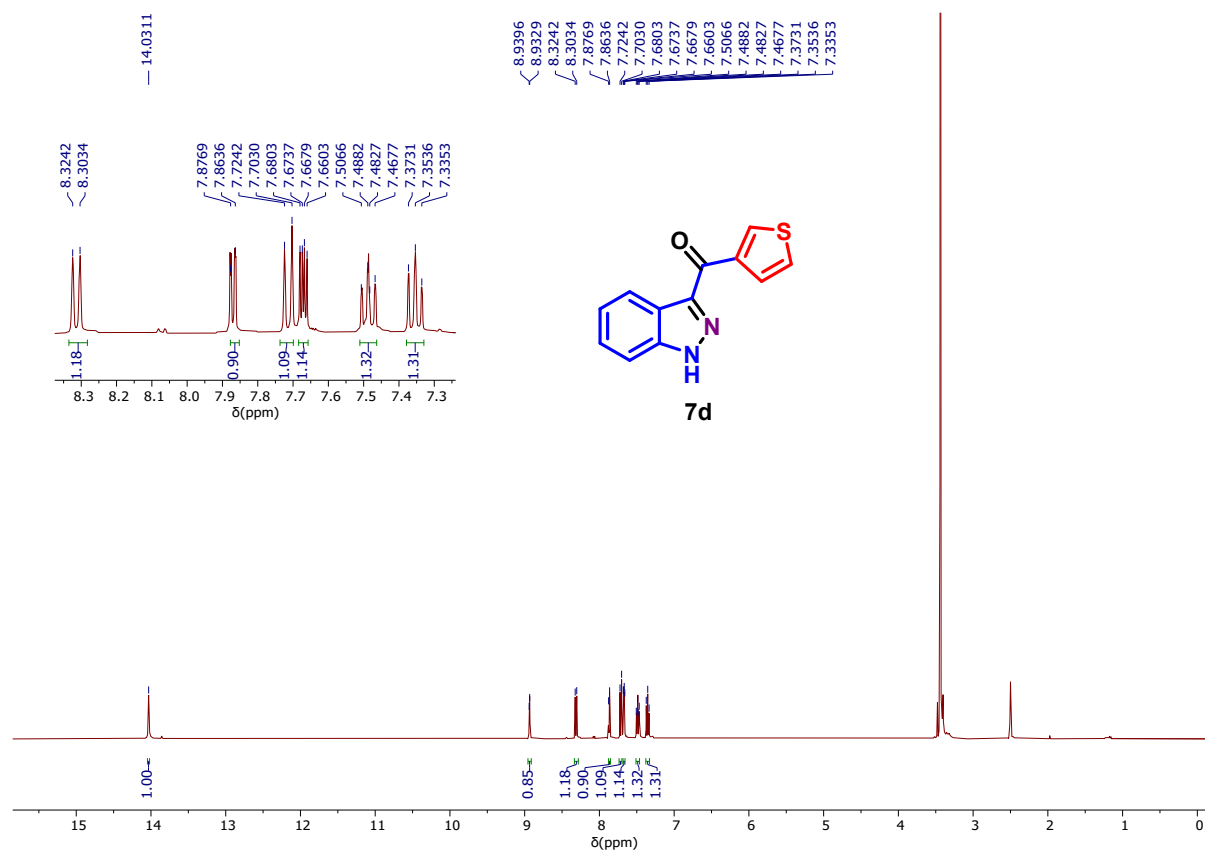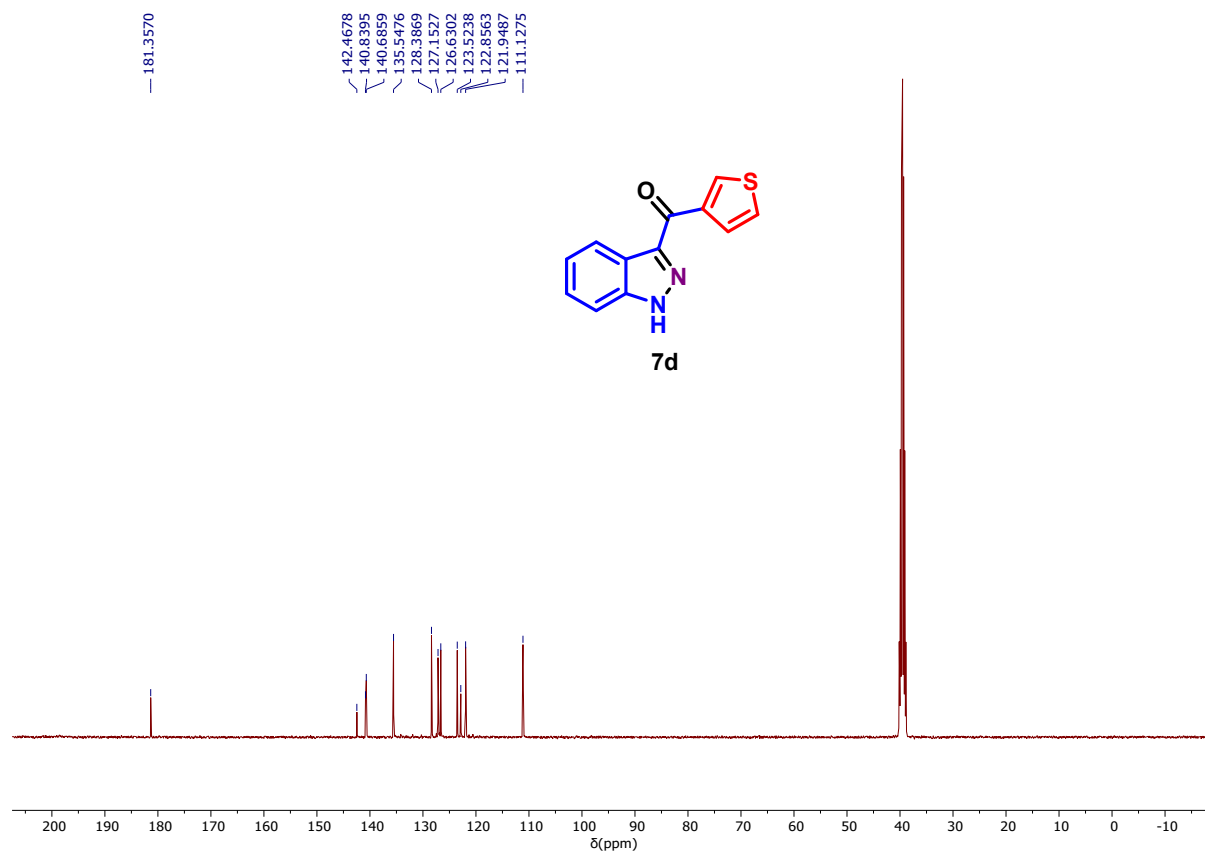

$^1\text{H}$  and  $^{13}\text{C}\{^1\text{H}\}$  NMR ( $\text{DMSO-}d_6$ , 400 and 101 MHz) of compound **7e**:

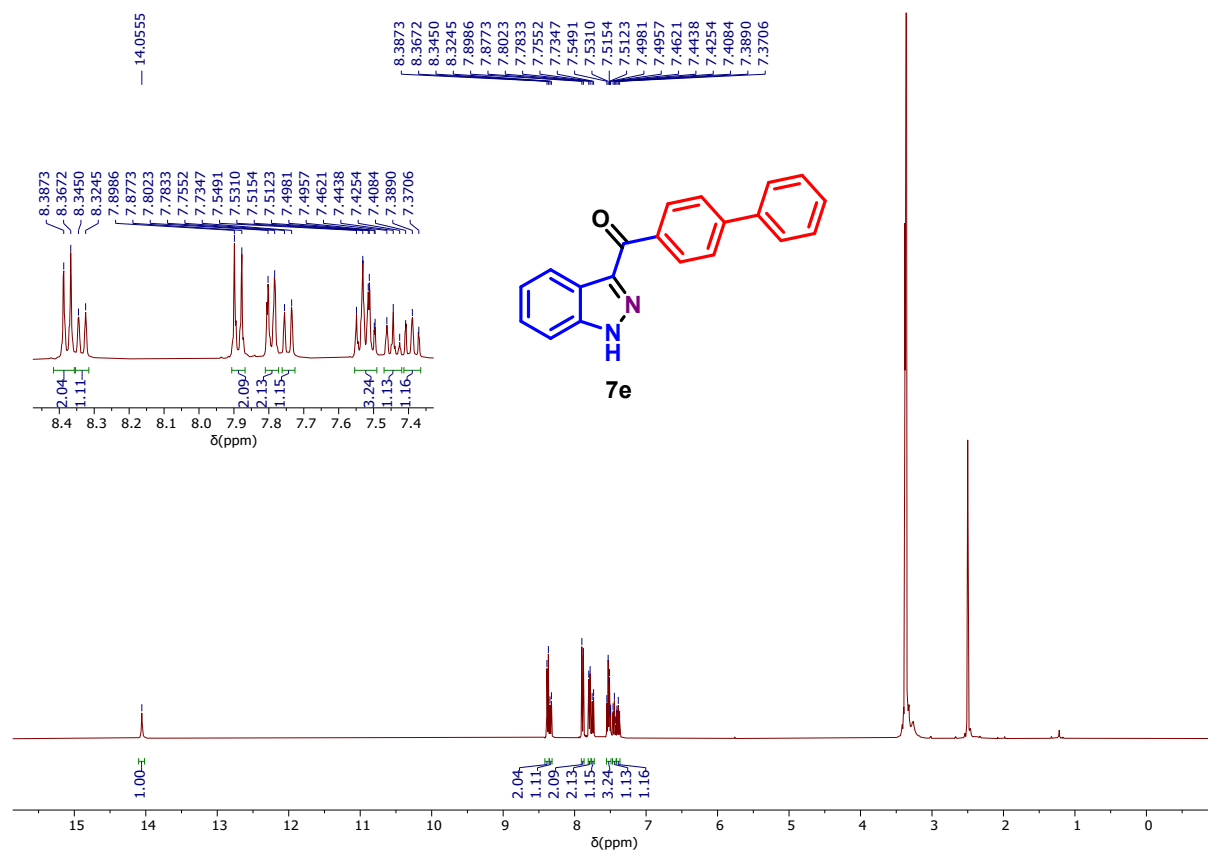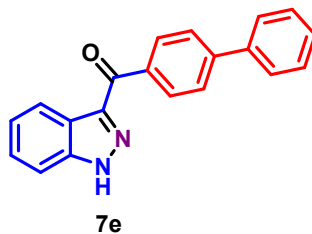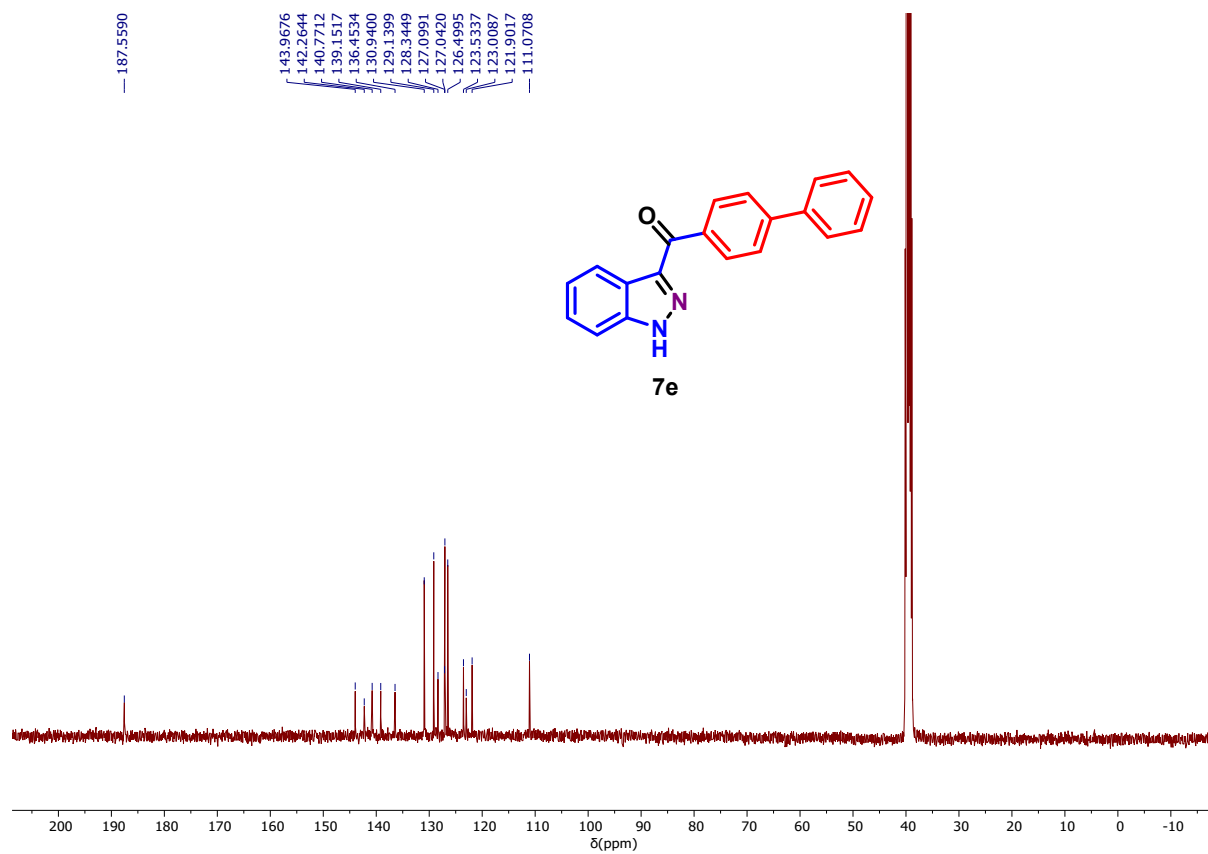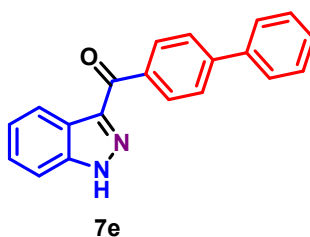

$^1\text{H}$ ,  $^{13}\text{C}\{^1\text{H}\}$  and  $^{19}\text{F}$  NMR (DMSO- $d_6$ , 400, 101 and 376 MHz) of compound 7f:

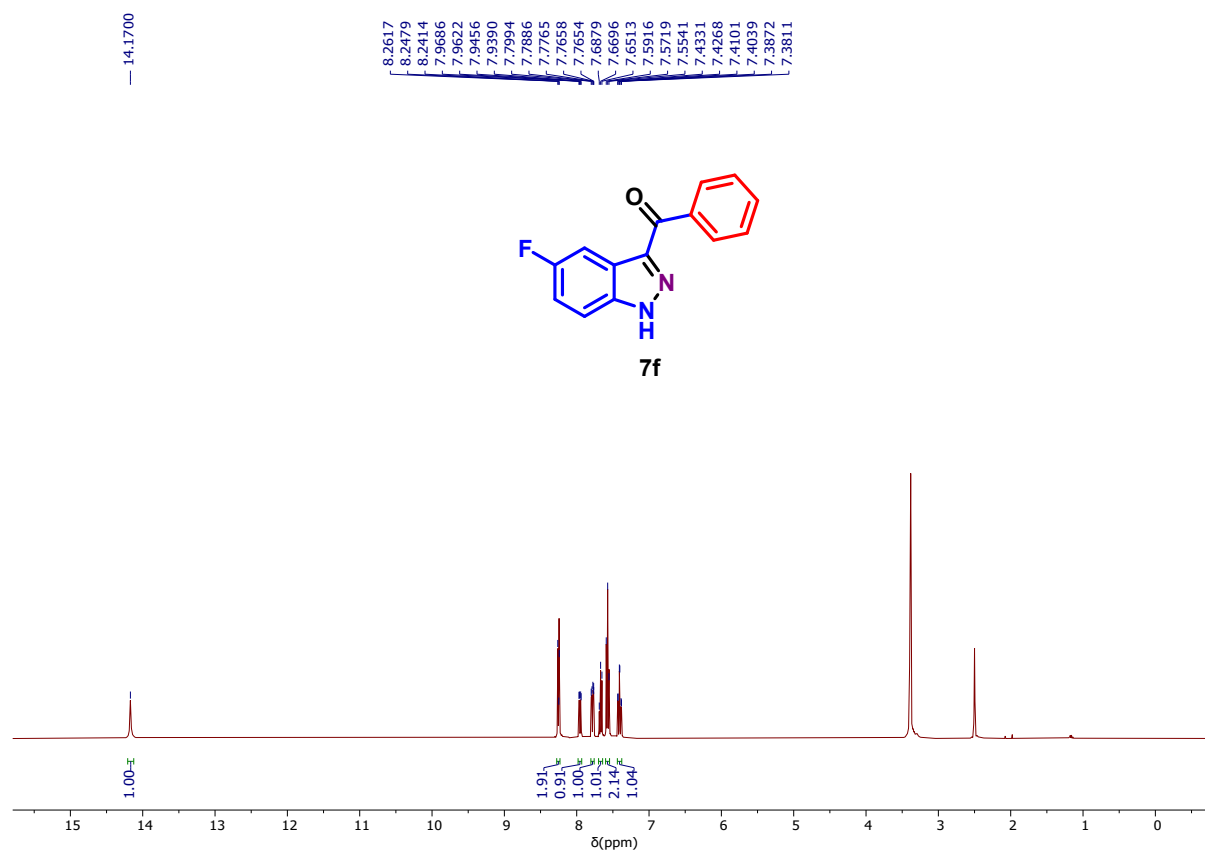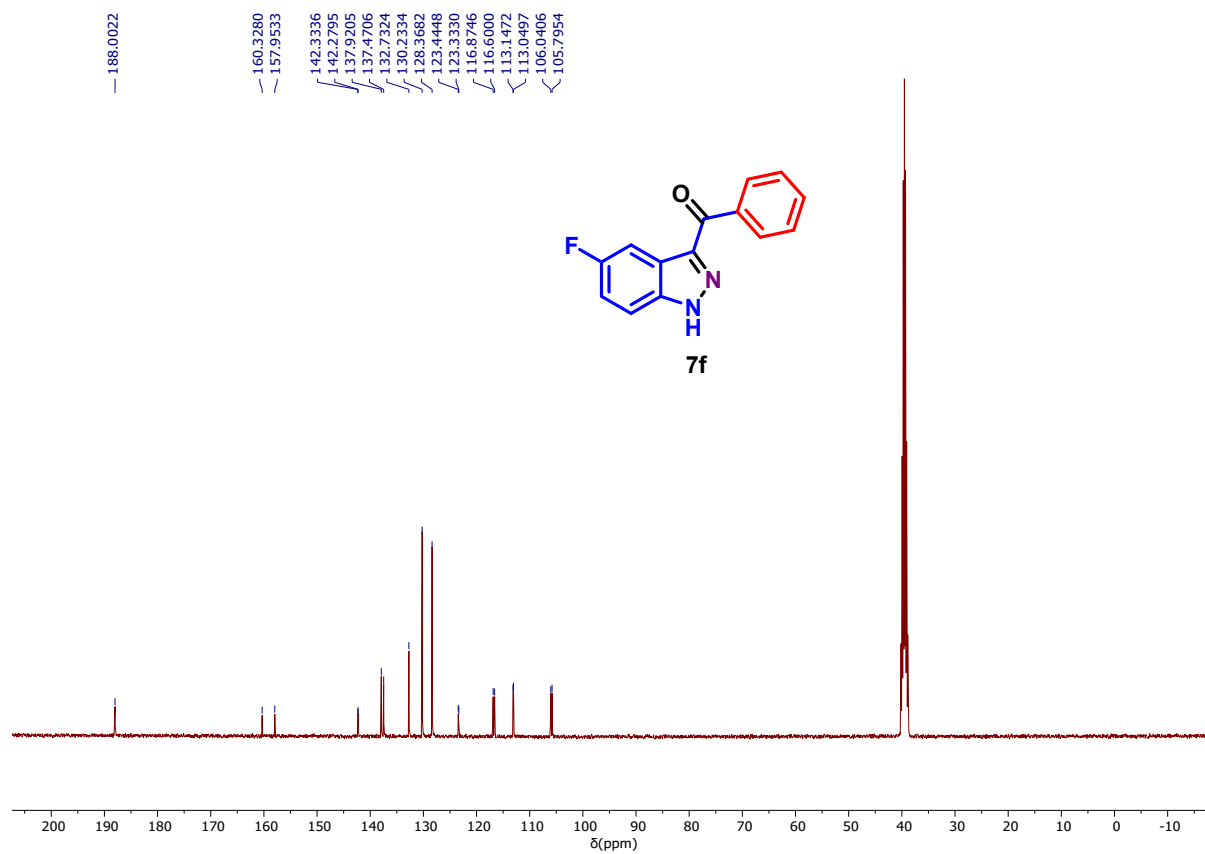

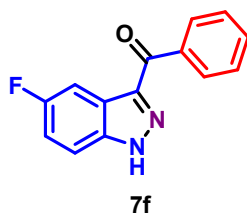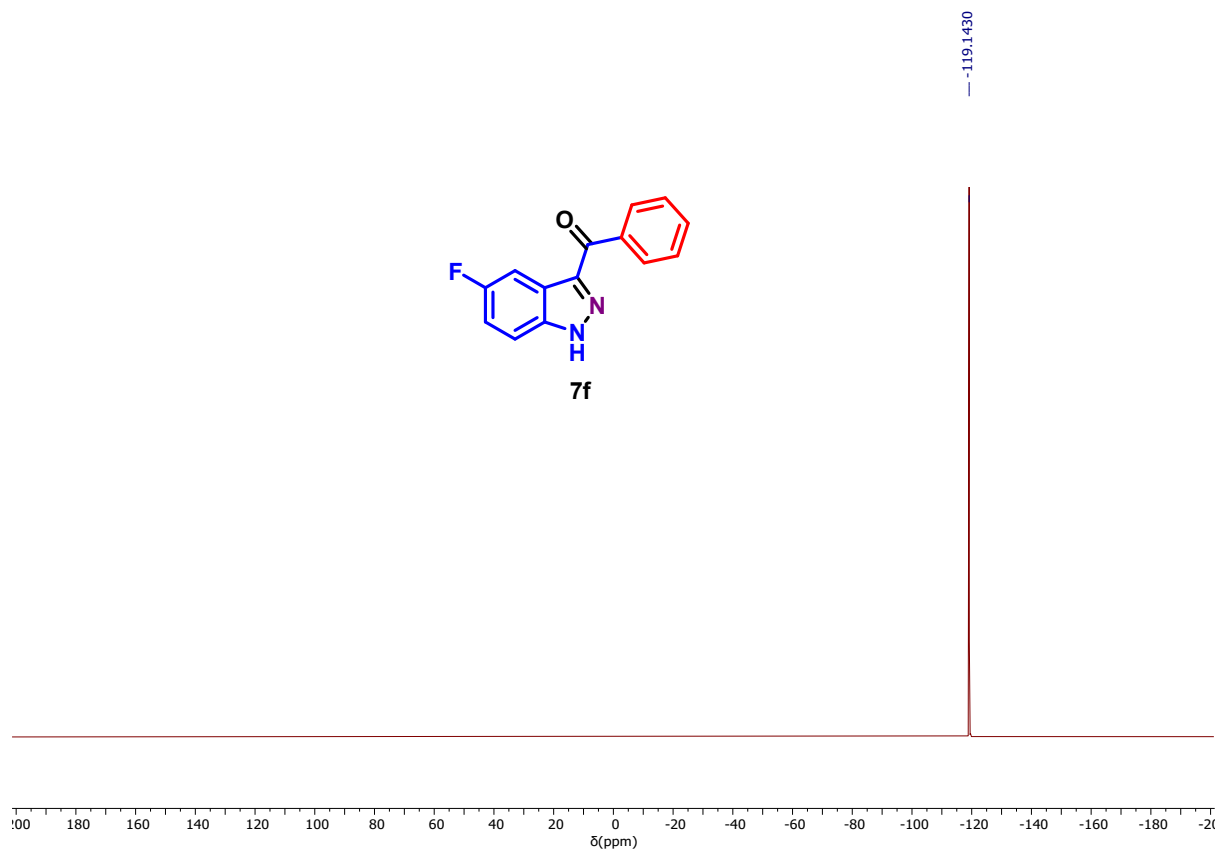

$^1\text{H}$  and  $^{13}\text{C}\{^1\text{H}\}$  NMR (DMSO- $d_6$ , 400 and 101 MHz) of compound 7g:

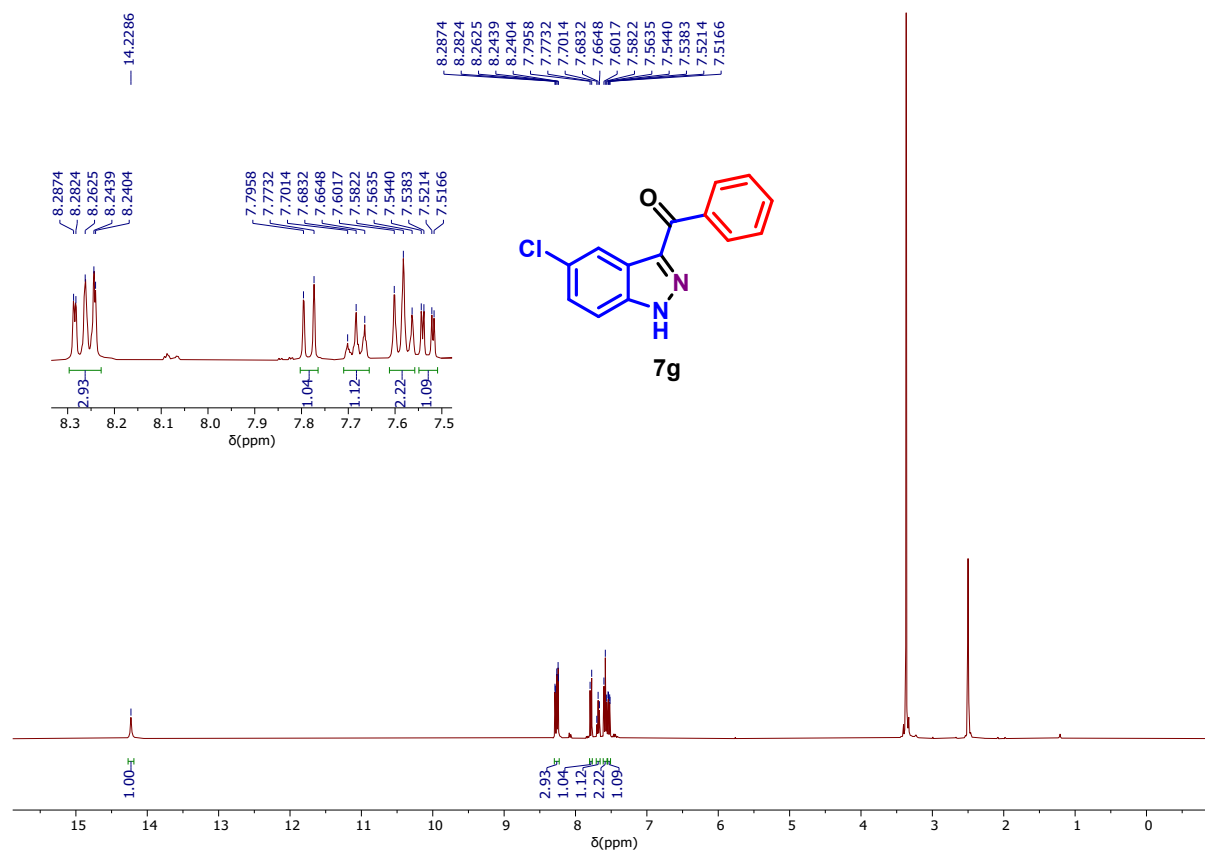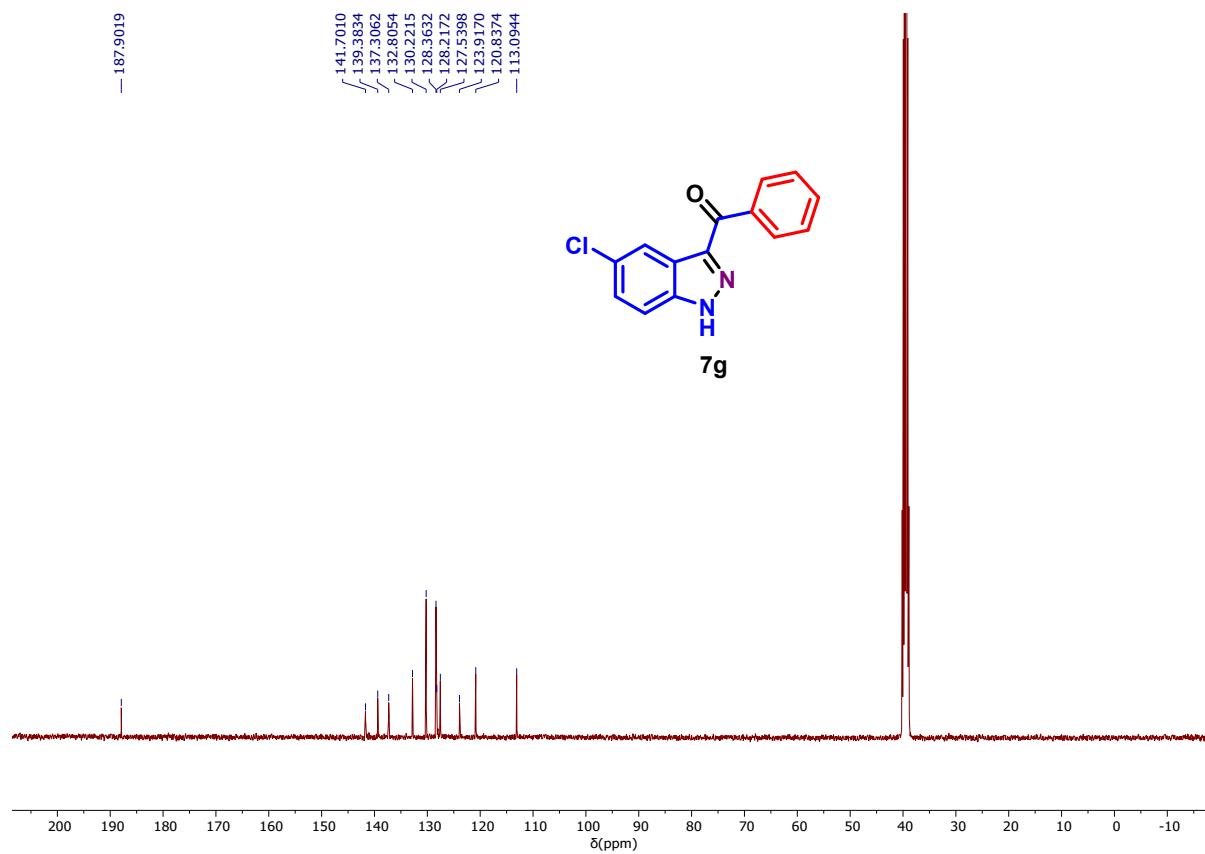

$^1\text{H}$  and  $^{13}\text{C}\{^1\text{H}\}$  NMR ( $\text{DMSO-}d_6$ , 400 and 101 MHz) of compound 7h:

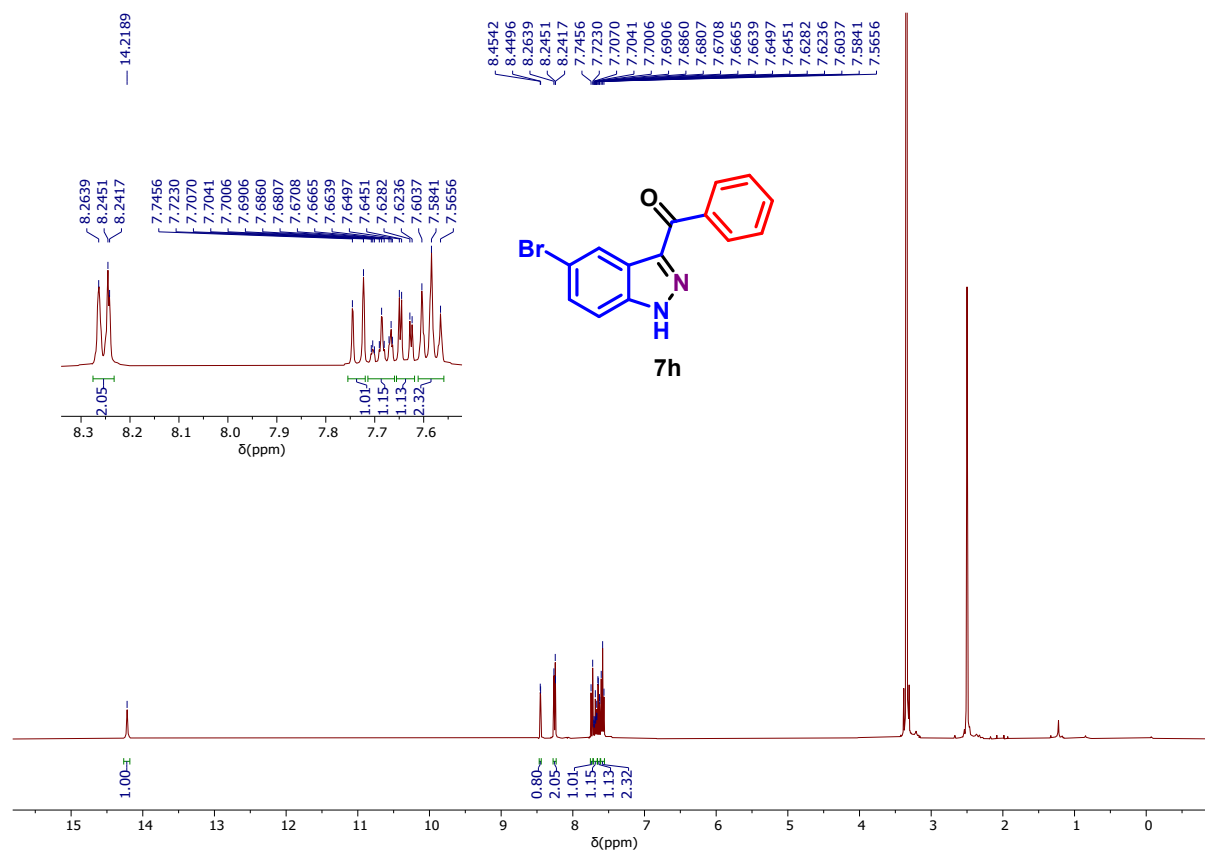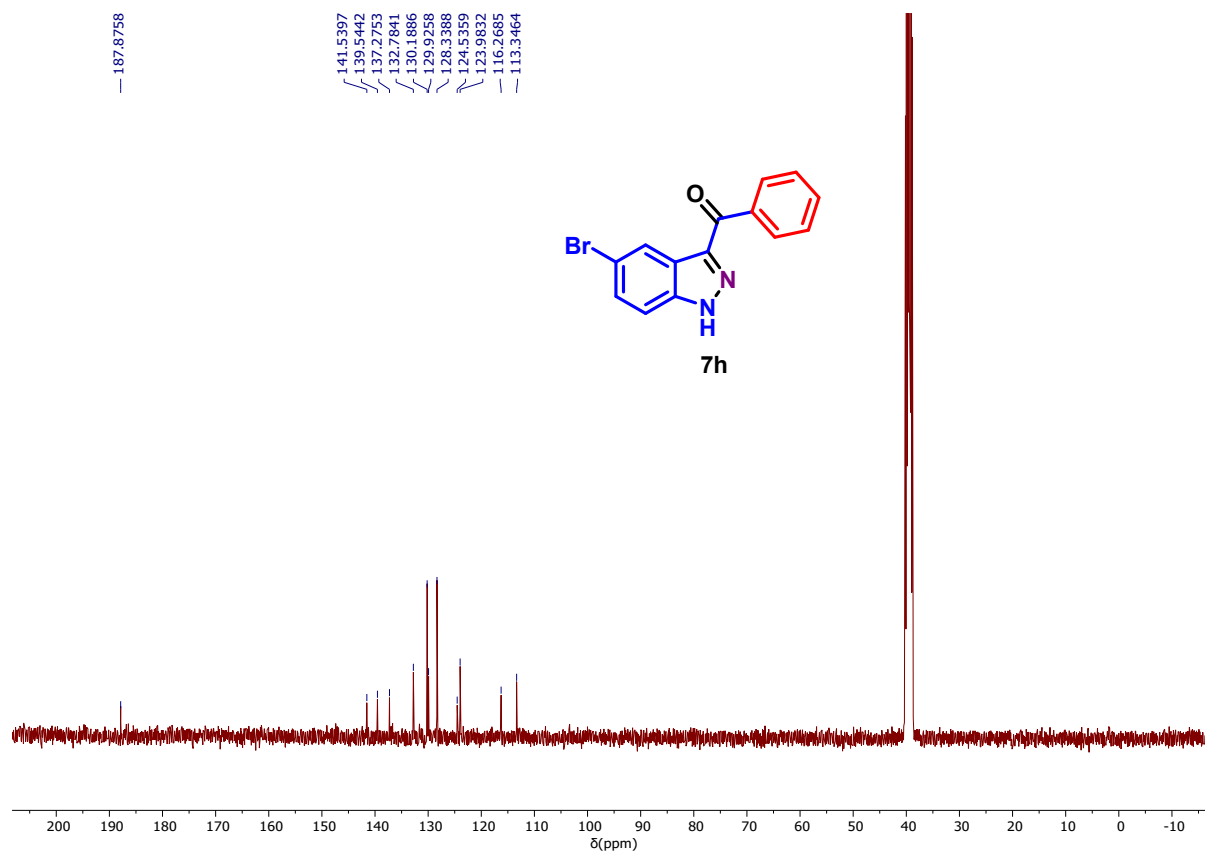



**$^1\text{H}$  and  $^{13}\text{C}\{^1\text{H}\}$  NMR (DMSO- $d_6$ , 400 and 101 MHz) of compound **8a**:**

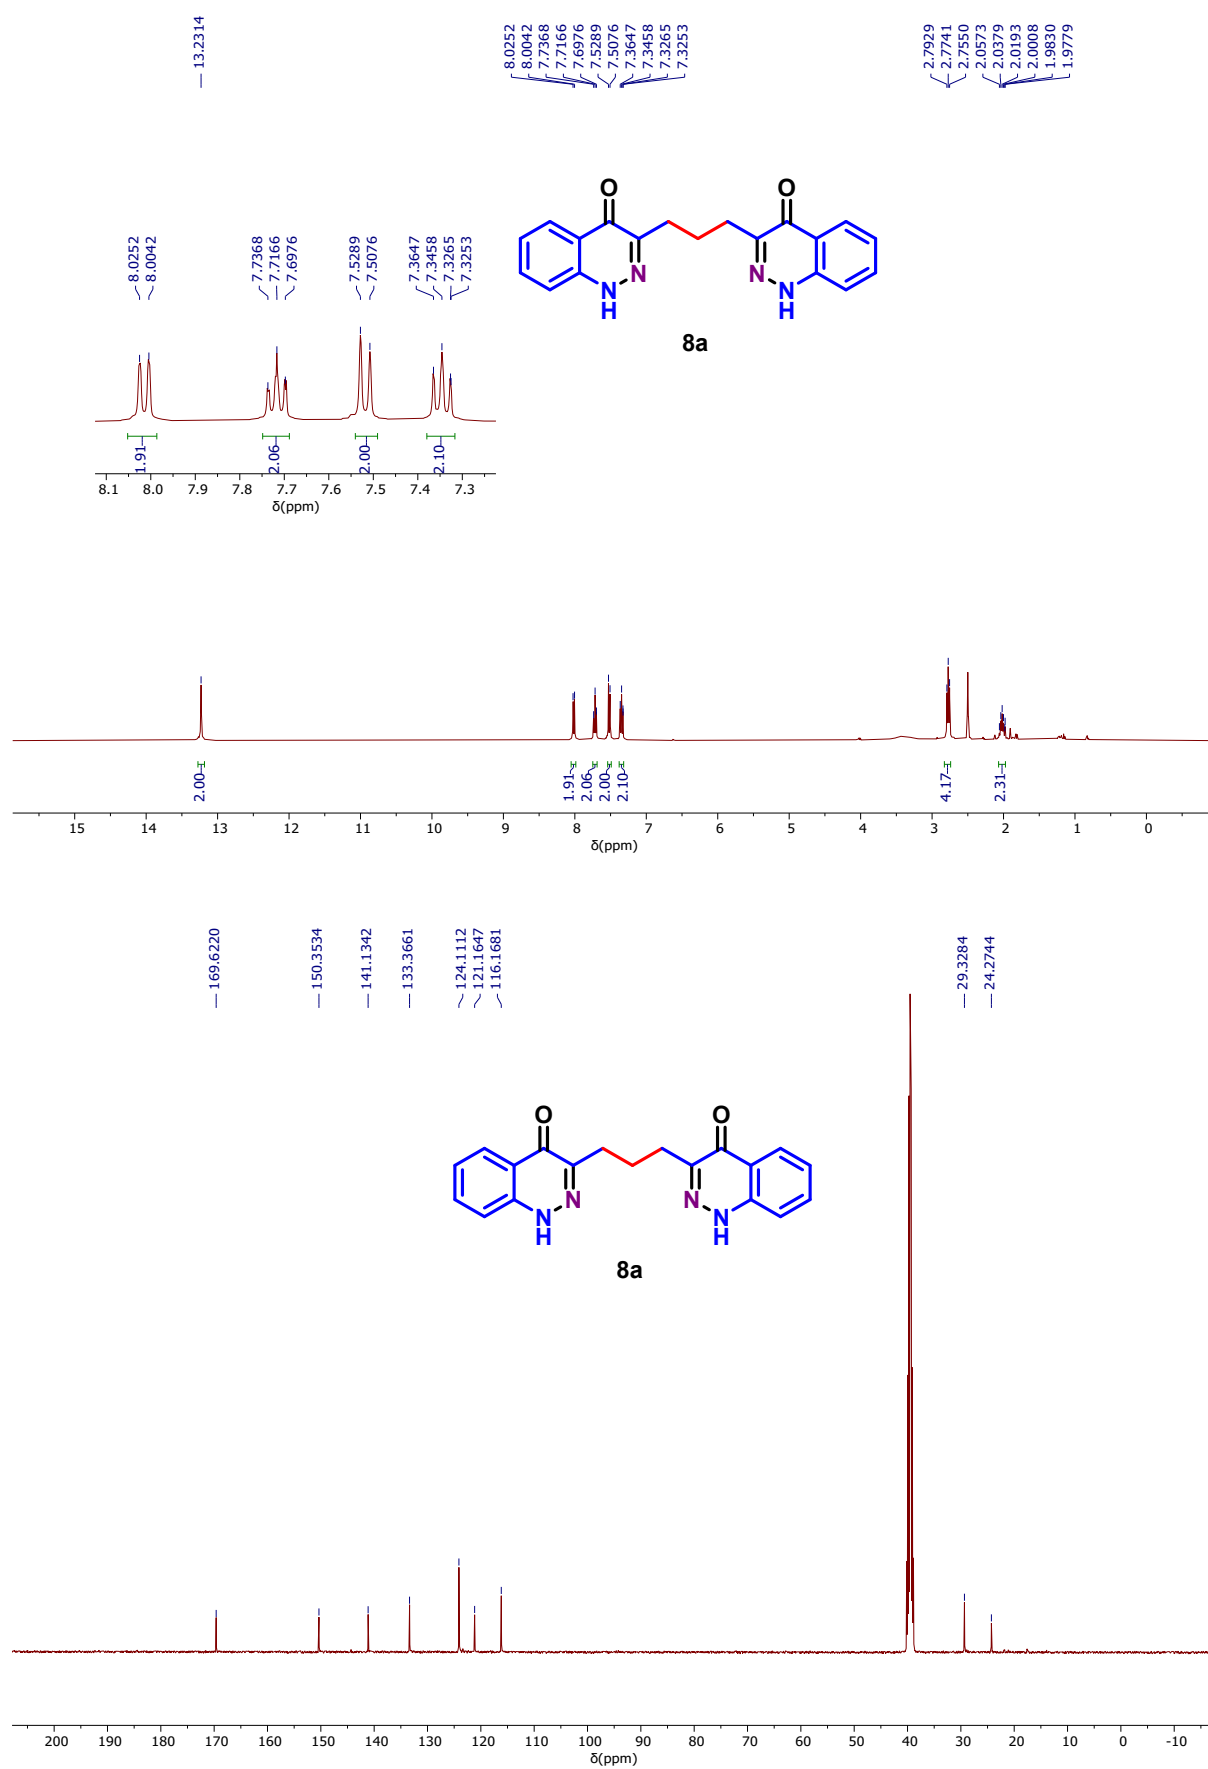

**$^1\text{H}$  and  $^{13}\text{C}\{^1\text{H}\}$  NMR (DMSO- $d_6$ , 400 and 101 MHz) of compound 8b:**

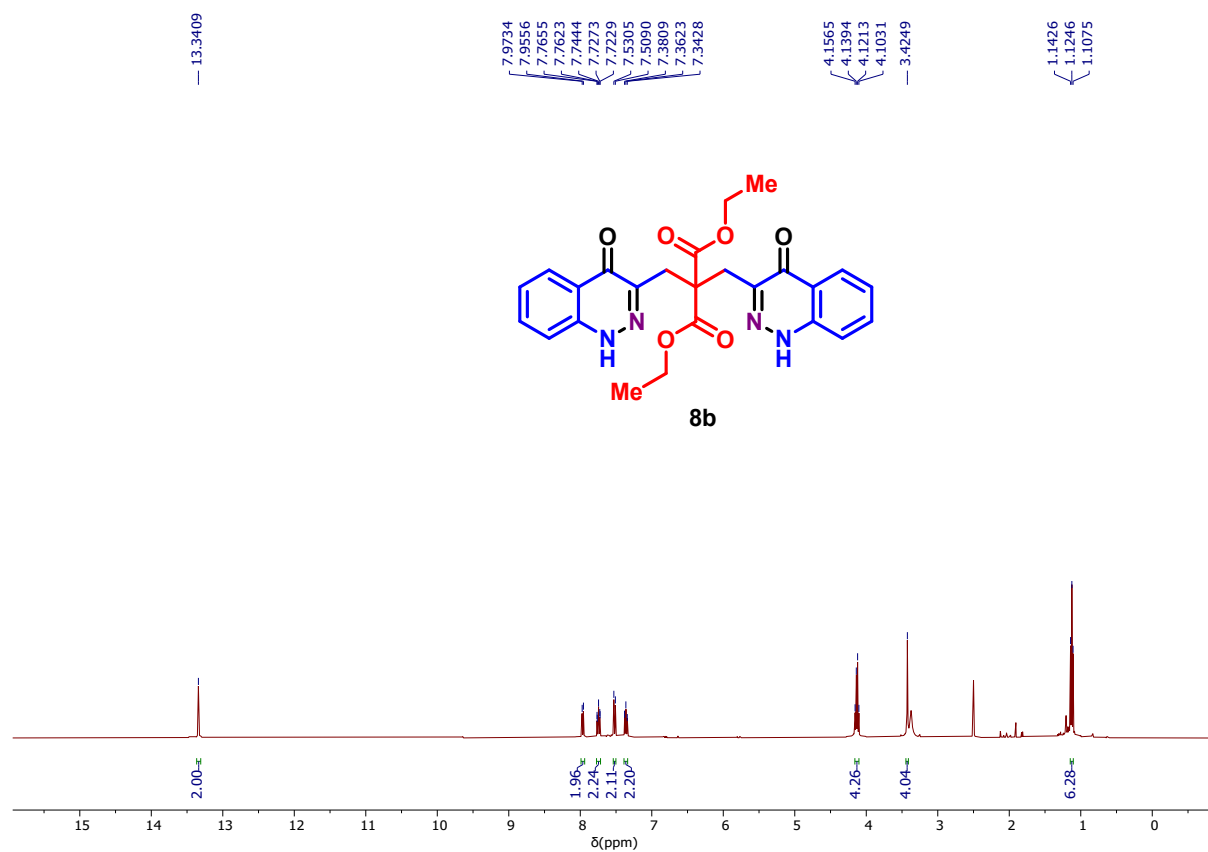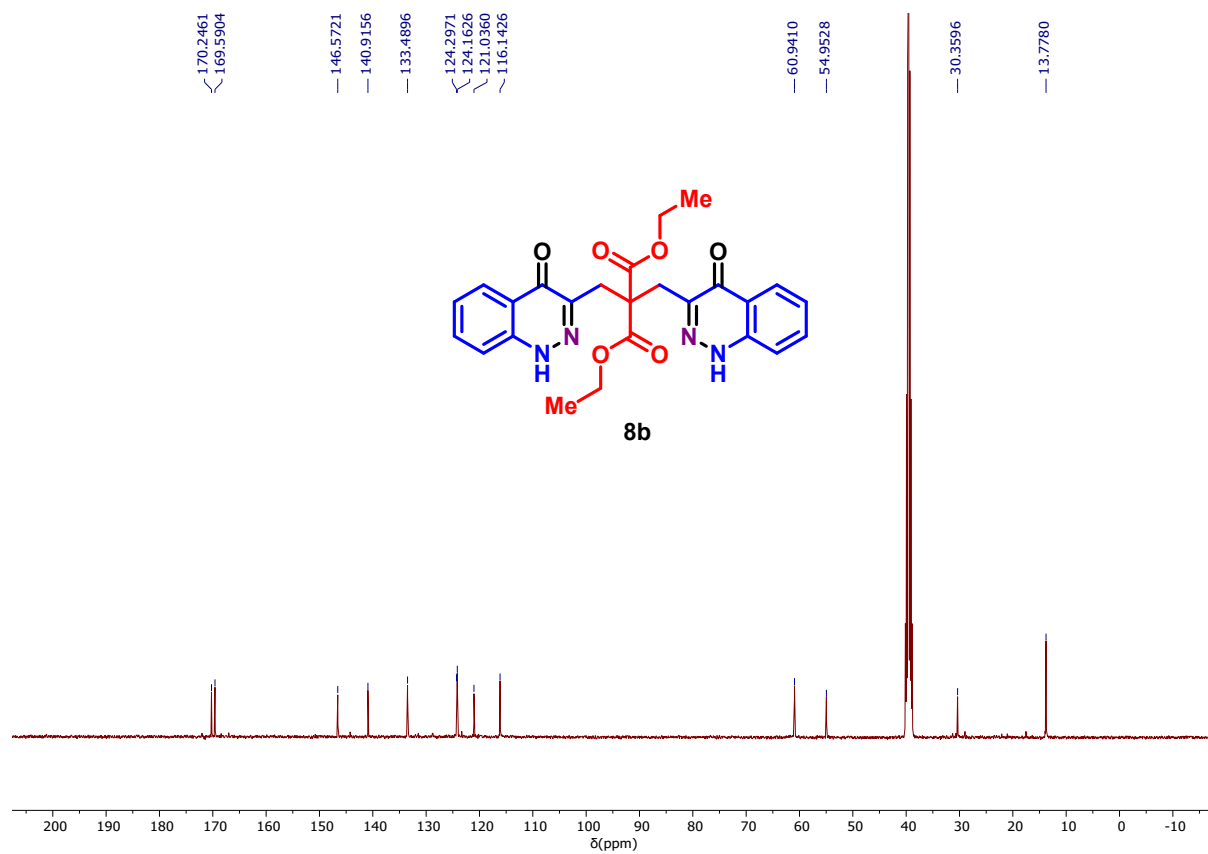

$^1\text{H}$  and  $^{13}\text{C}\{^1\text{H}\}$  NMR ( $\text{CDCl}_3$ , 400 and 101 MHz) of compound 10:

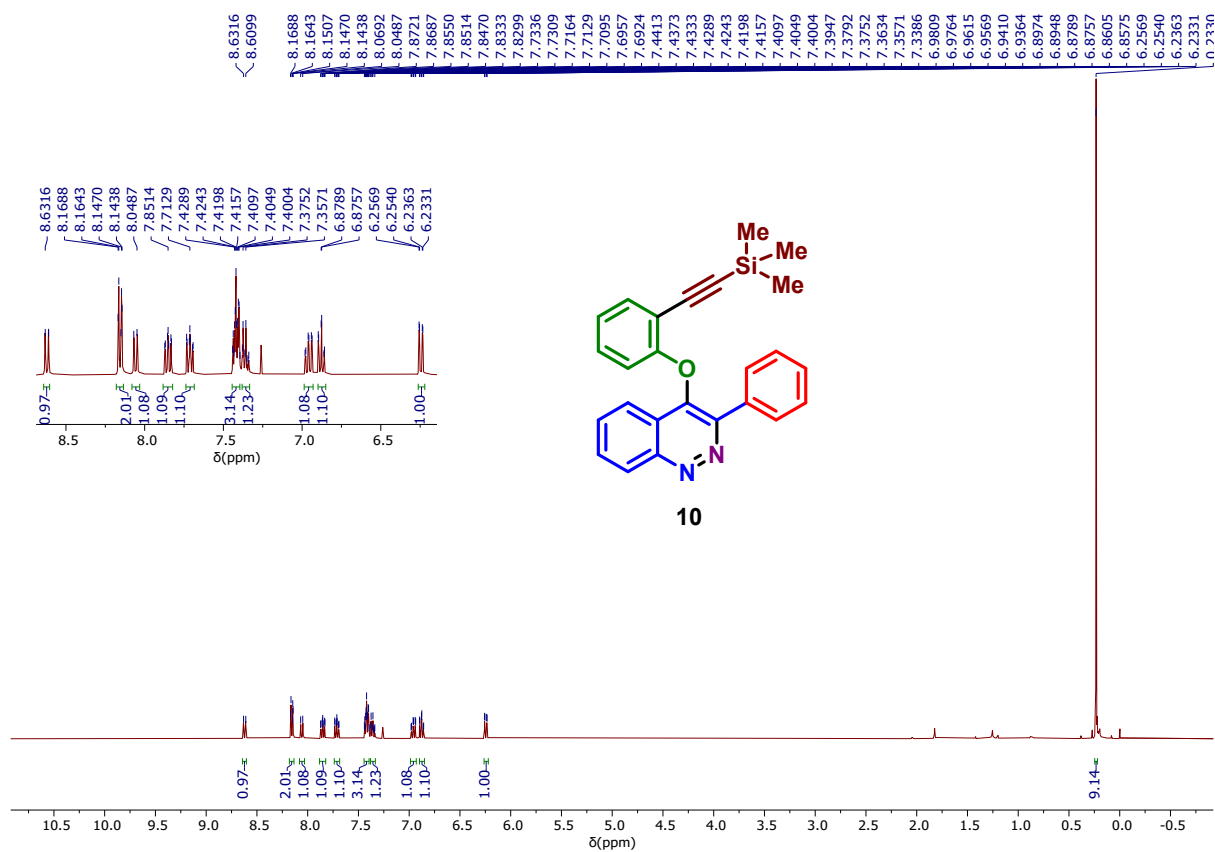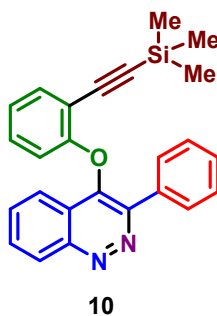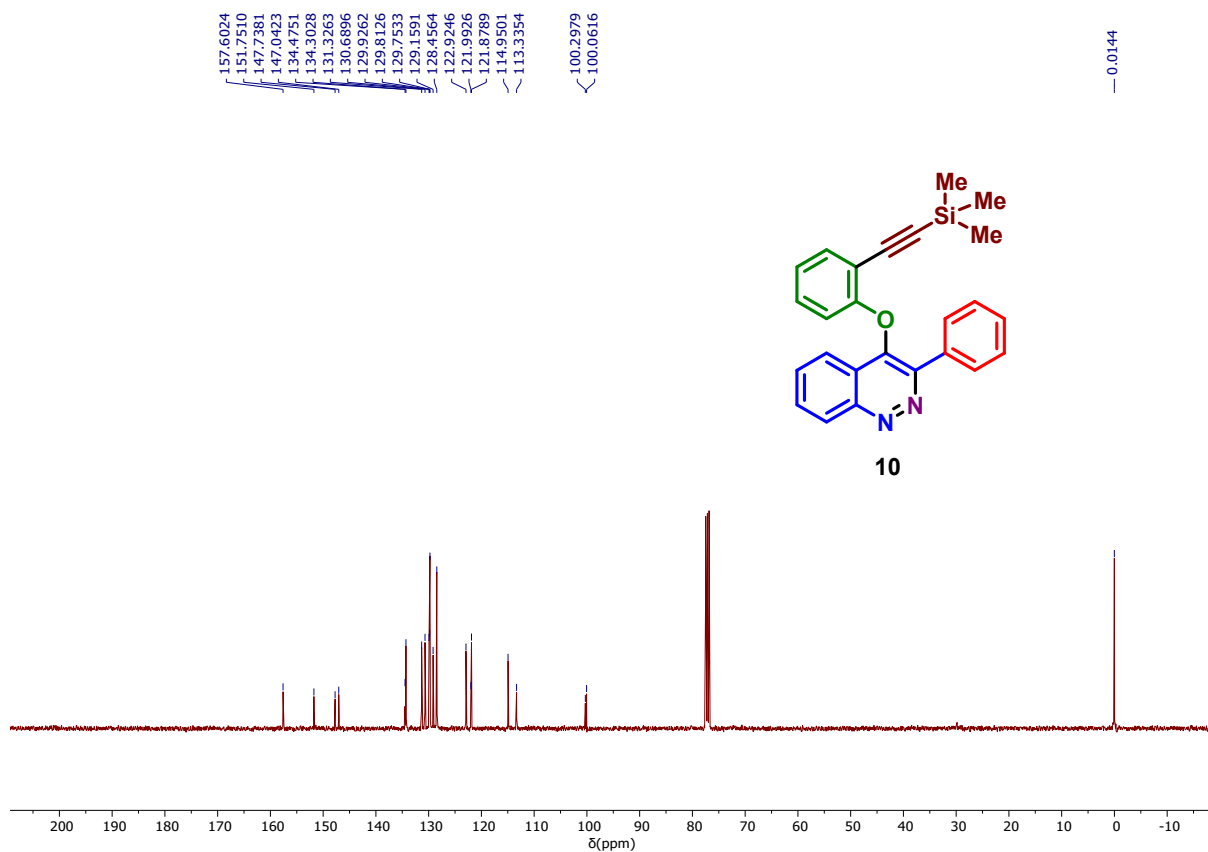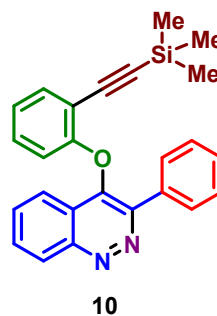

$^1\text{H}$  and  $^{13}\text{C}\{^1\text{H}\}$  NMR ( $\text{CDCl}_3$ , 400 and 101 MHz) of compound 12a:

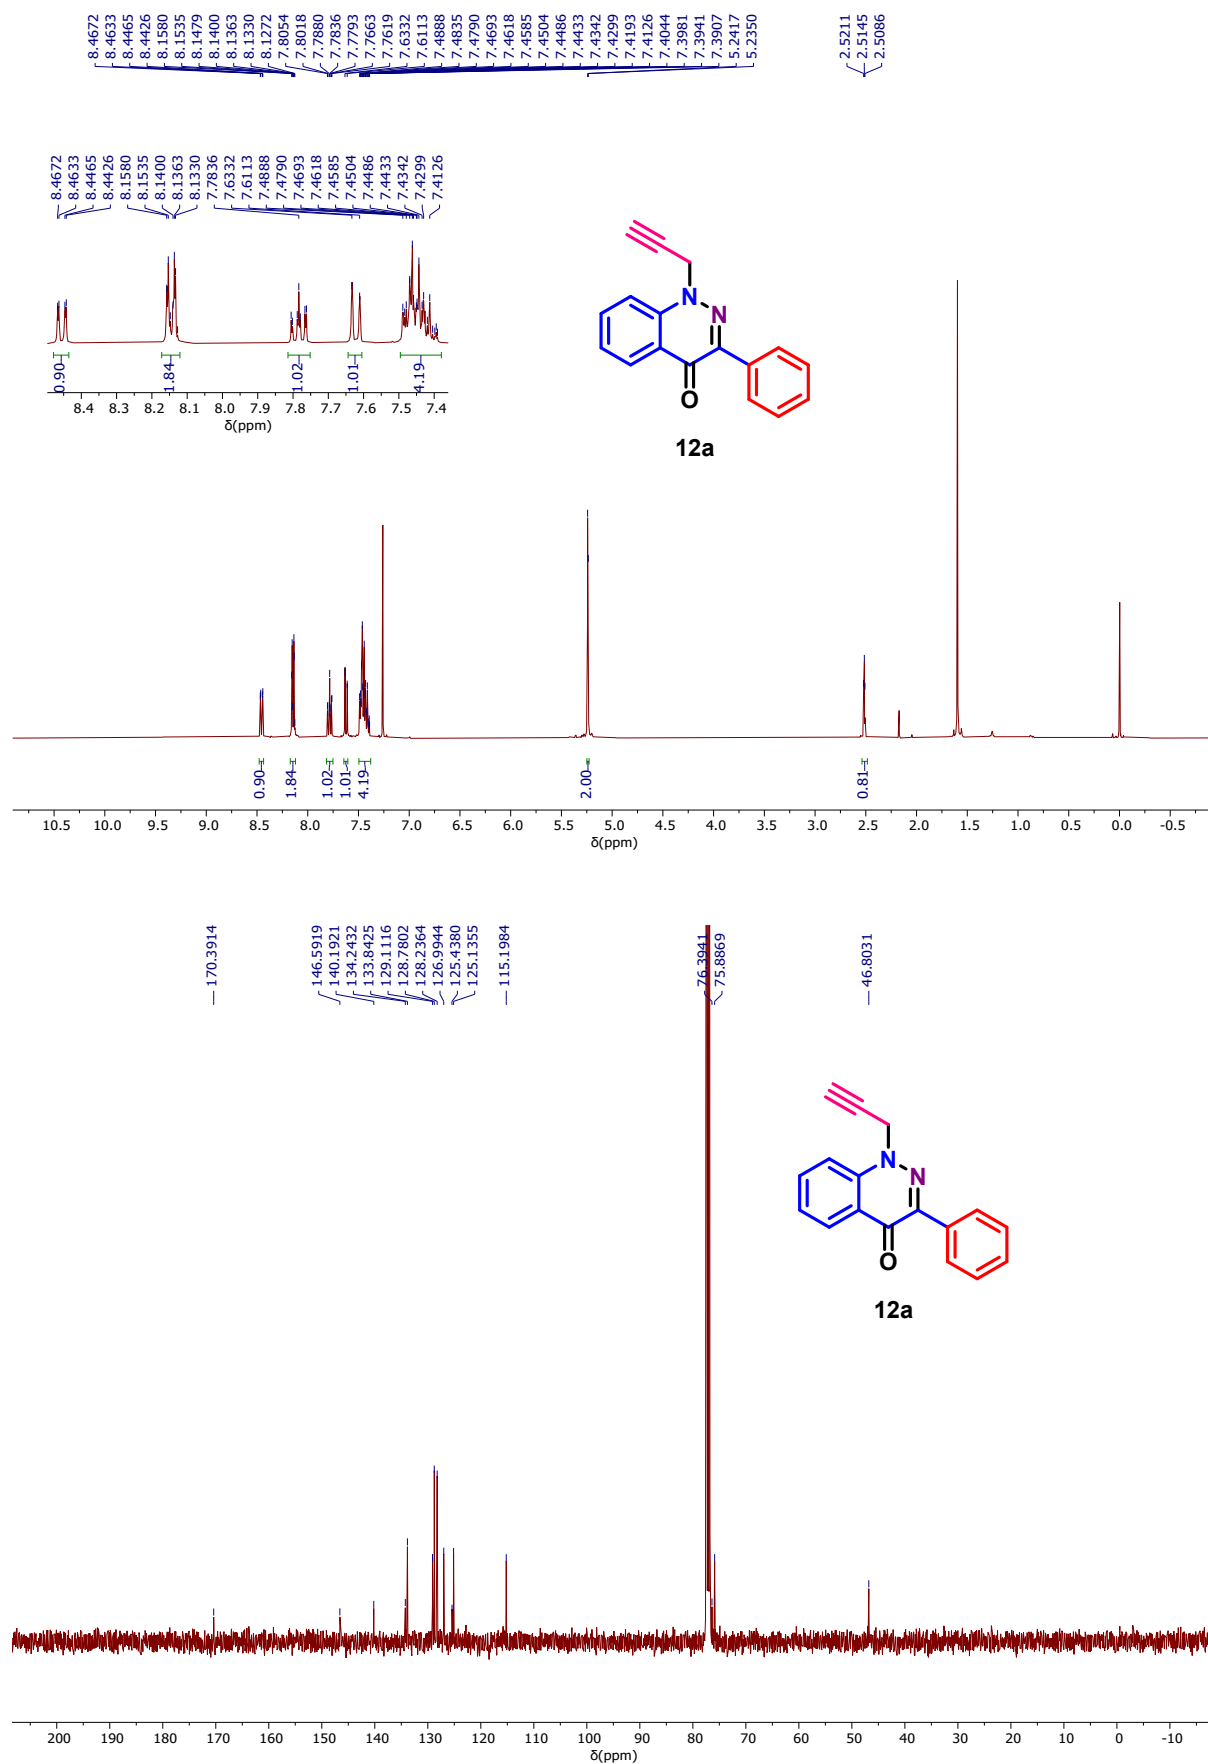

$^1\text{H}$  and  $^{13}\text{C}\{^1\text{H}\}$  NMR ( $\text{CDCl}_3$ , 400 and 101 MHz) of compound 12b:

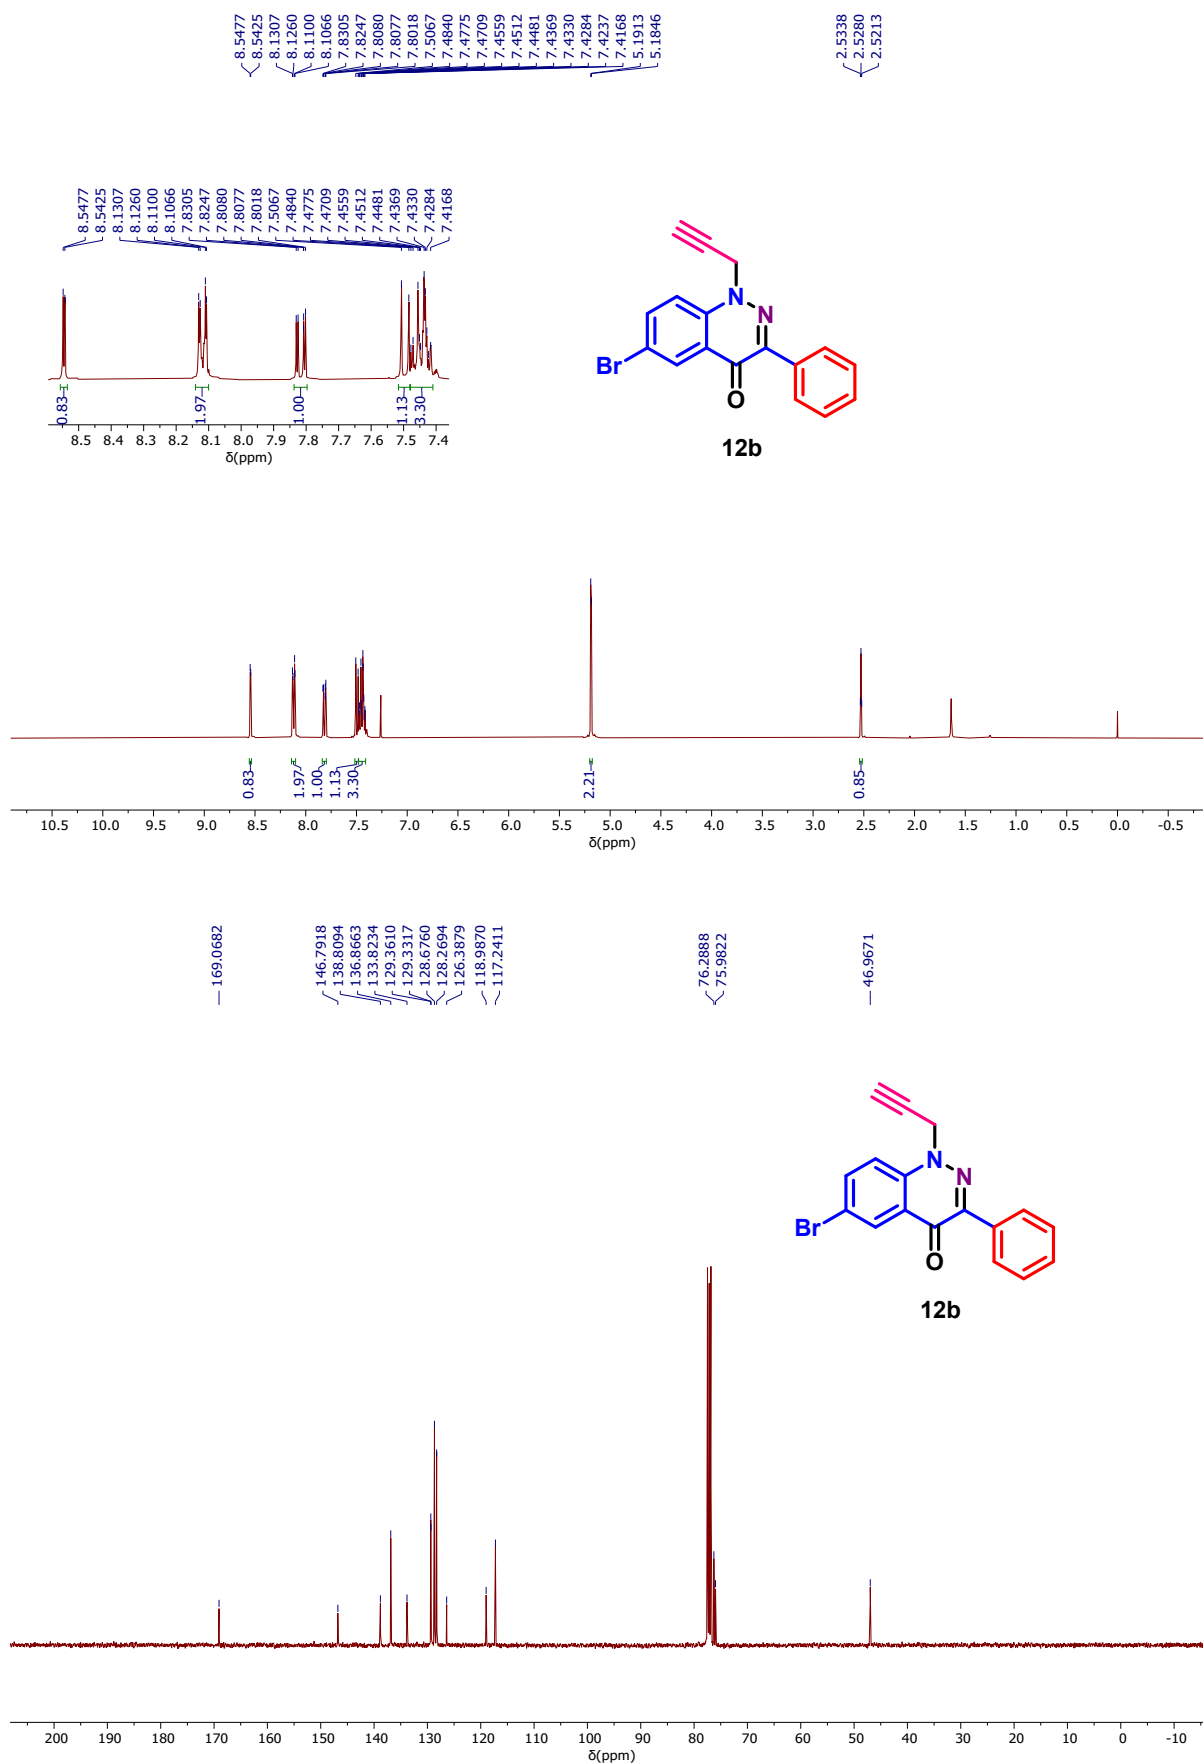

$^1\text{H}$  and  $^{13}\text{C}\{^1\text{H}\}$  NMR ( $\text{CDCl}_3$ , 400 and 101 MHz) of compound 14:

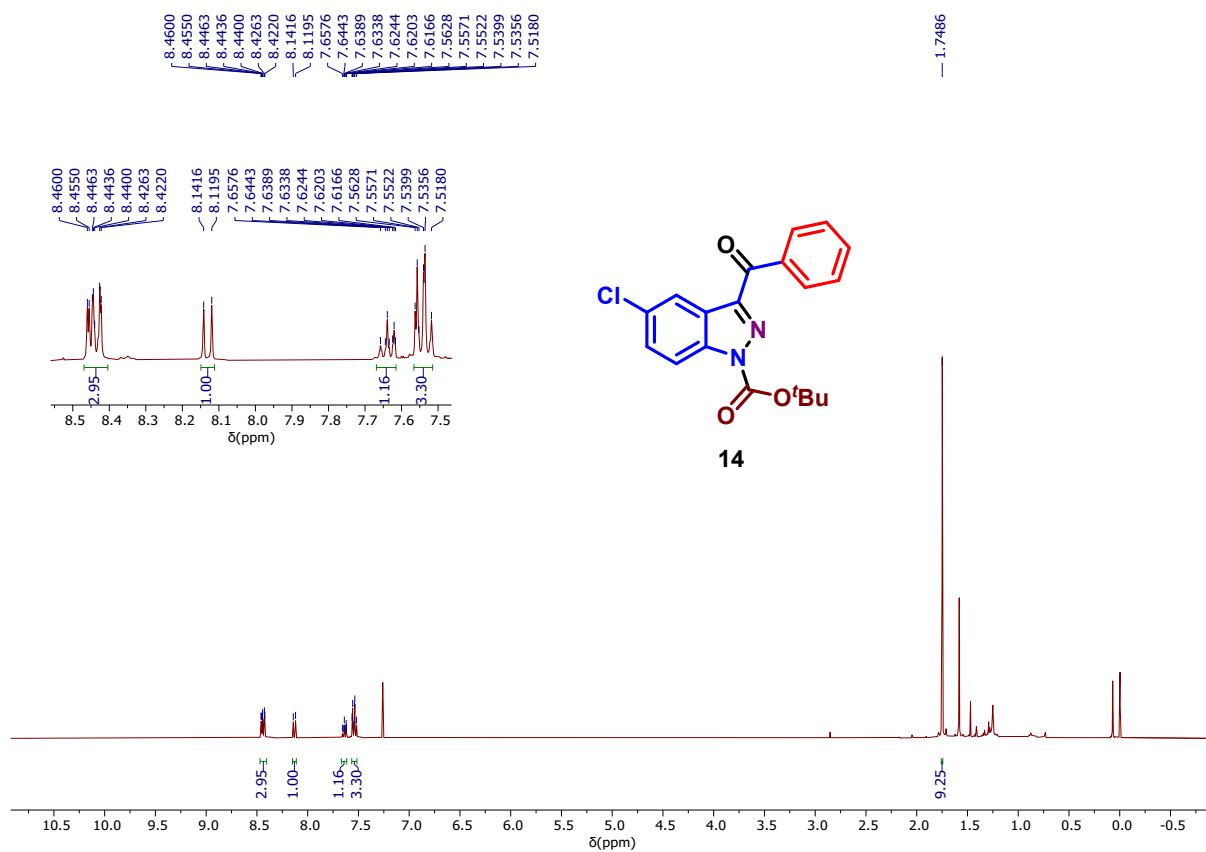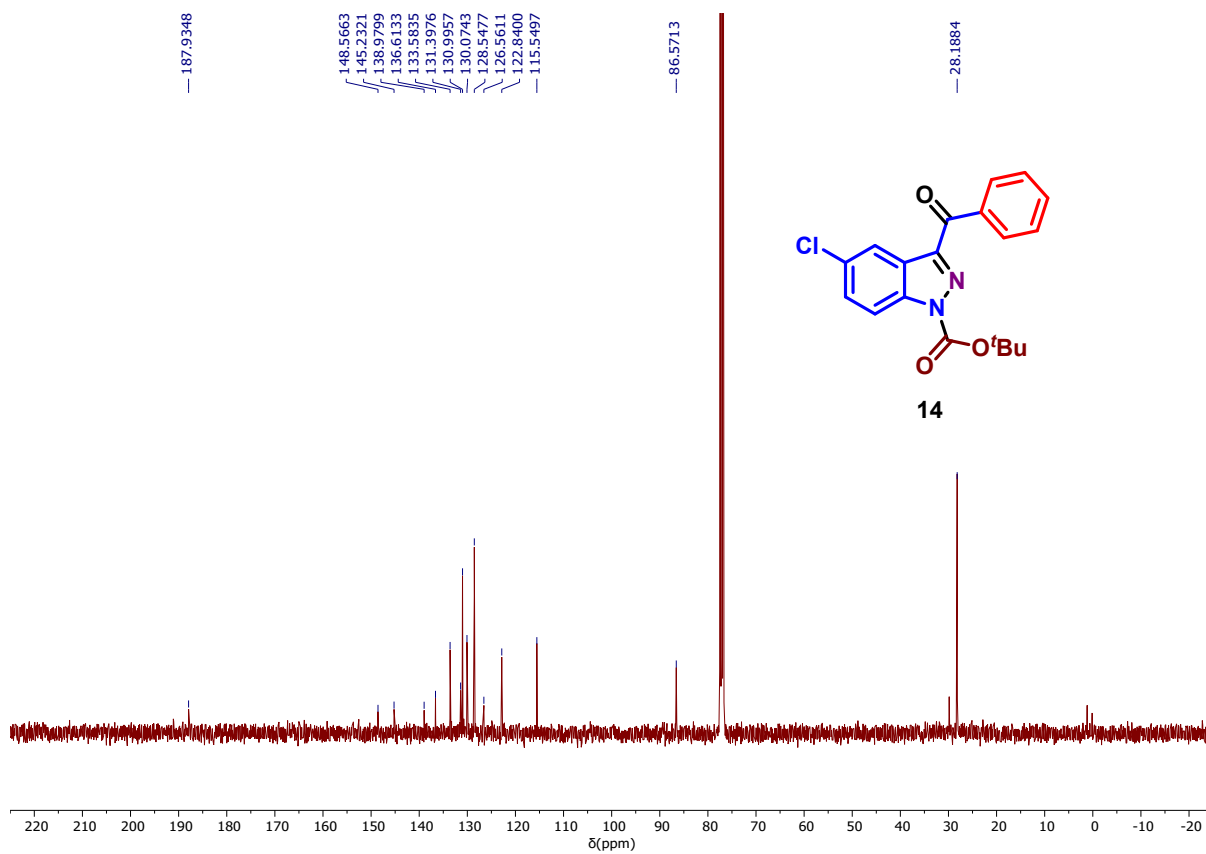

**$^1\text{H}$  and  $^{13}\text{C}\{^1\text{H}\}$  NMR ( $\text{CDCl}_3$ , 400 and 101 MHz) of compound 15:**

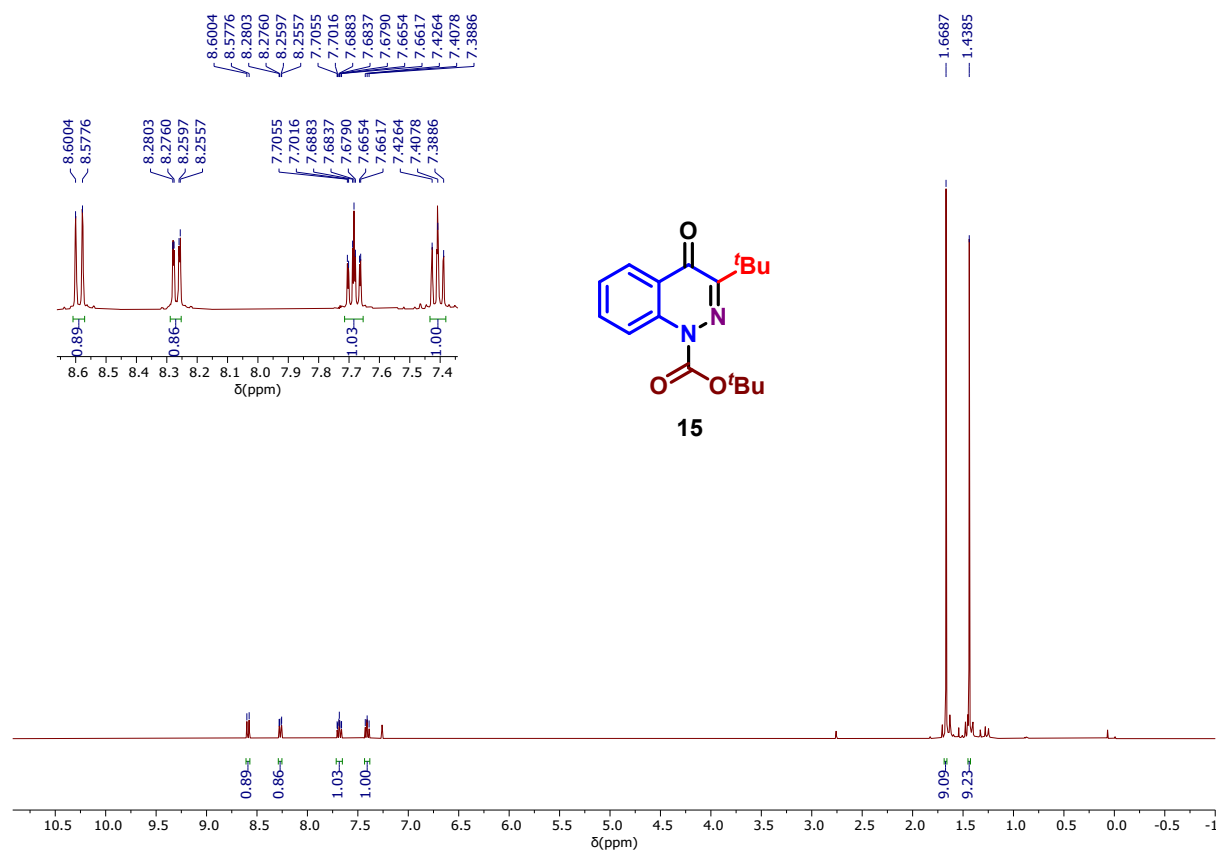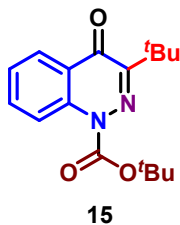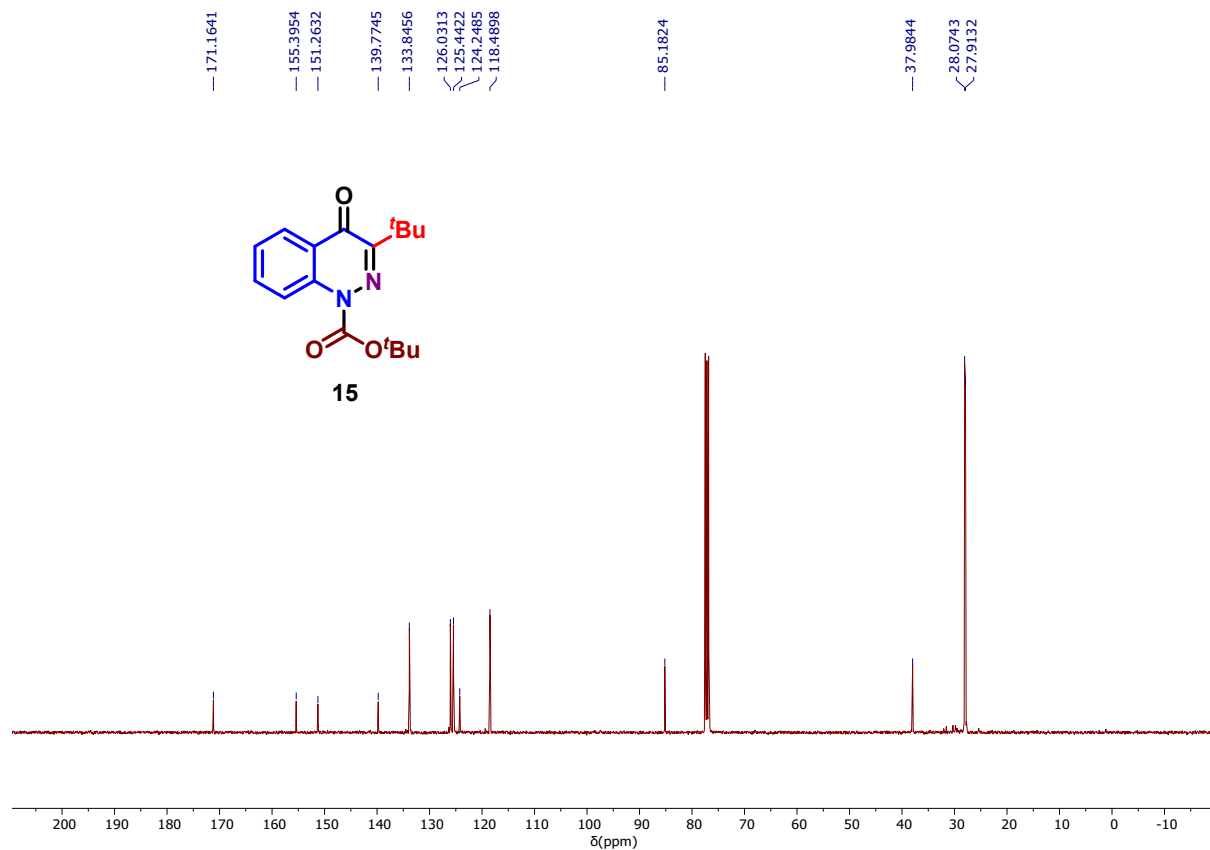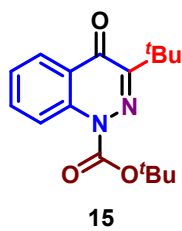

$^1\text{H}$  and  $^{13}\text{C}\{^1\text{H}\}$  NMR ( $\text{CDCl}_3$ , 400 and 101 MHz) of compound 16:

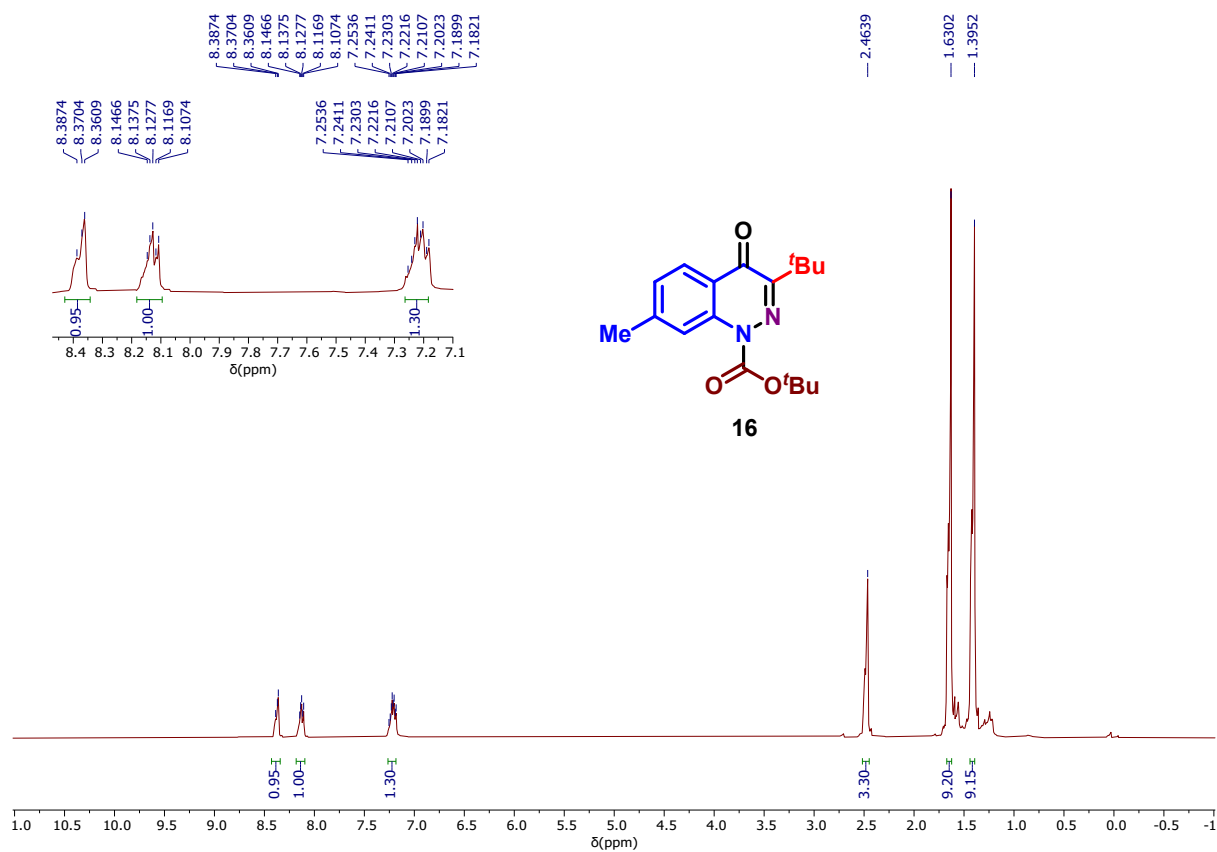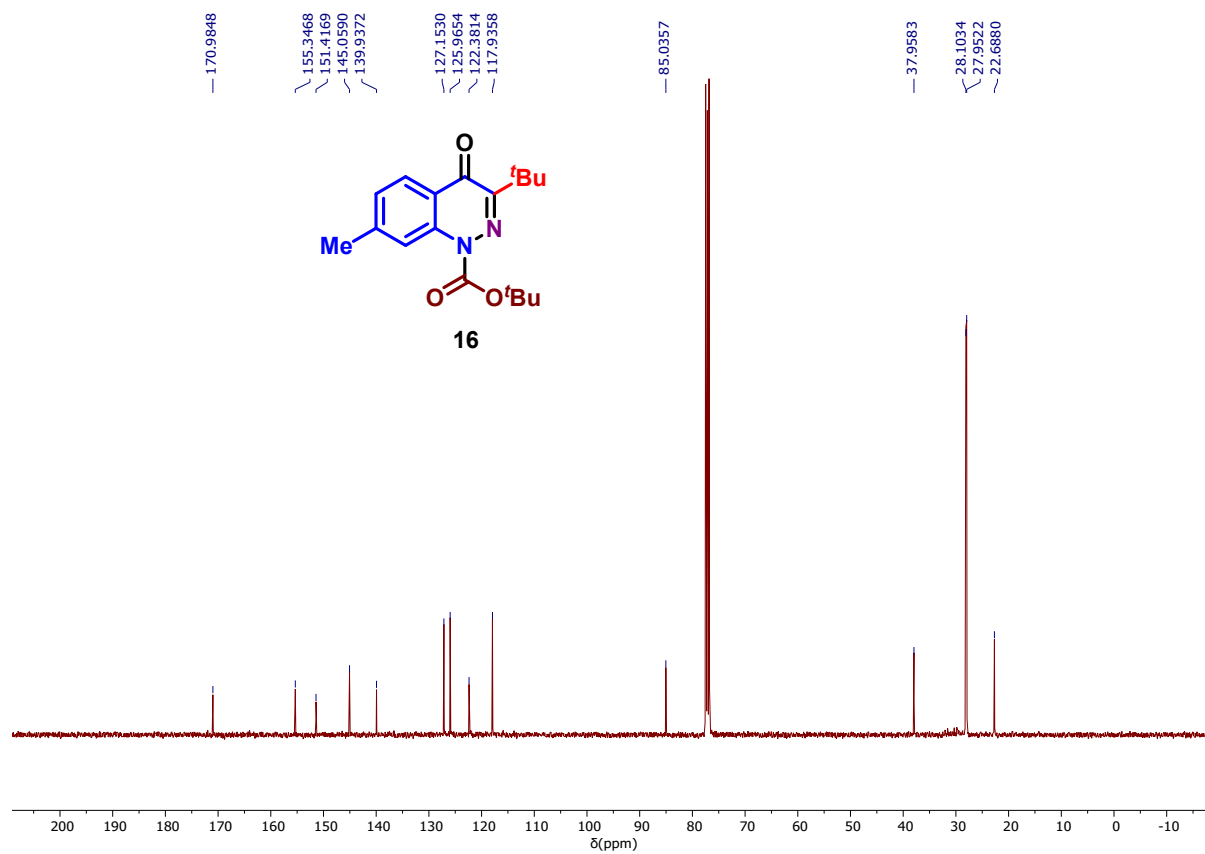



**$^1\text{H}$  and  $^{13}\text{C}\{^1\text{H}\}$  NMR ( $\text{CDCl}_3$ , 400 and 101 MHz) of compound 17:**

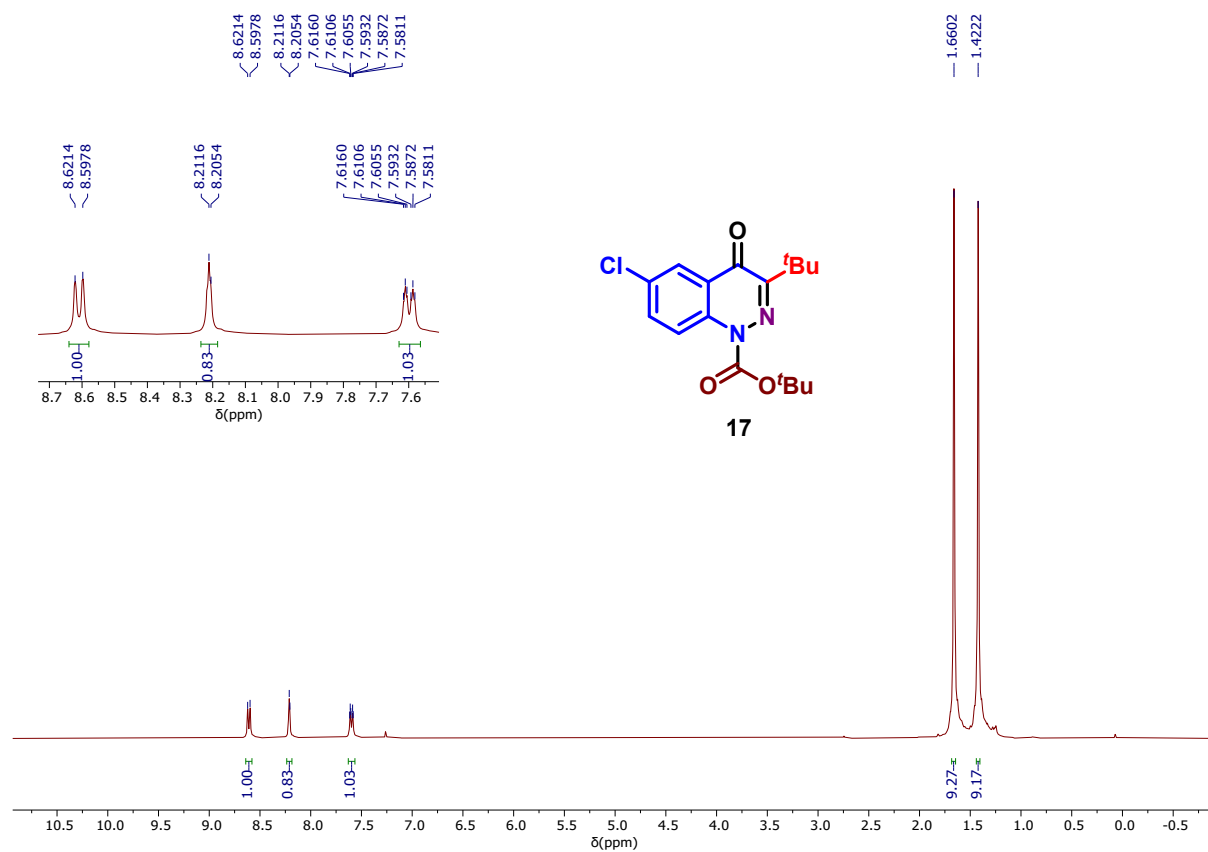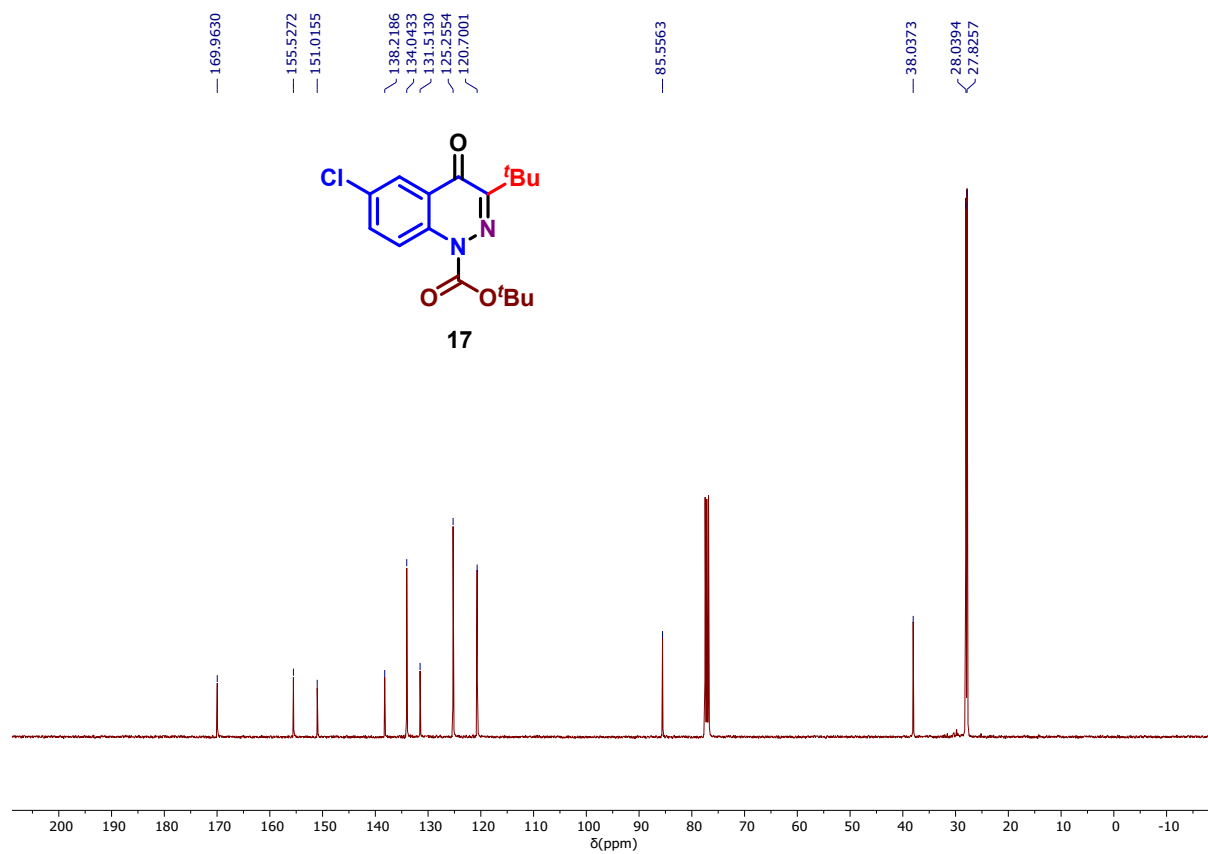

**S5. X-ray crystallographic data**

For the determination of X-ray crystal structures, single crystals were selected and mounted with paratone oil on a glass fiber using gum. The data were collected at 298 K on a CMOS based Bruker D8 Venture PHOTON 100 diffractometer equipped with a INCOATEC micro-focus source with graphite monochromatic Mo K $\alpha$  radiation ( $\lambda = 0.71073 \text{ \AA}$ ) operating at 50 kV and 30 mA. For the integration of diffraction profiles SAINT program<sup>2</sup> was used. Adsorption correction was done applying SADABS program.<sup>3</sup> The crystal structure was solved by SIR 92<sup>4</sup> and refined by full matrix least square method using SHELXL-97<sup>5</sup> WinGX system, Ver 1.70.01.<sup>6</sup> All the non-hydrogen atoms in the structure were located from the Fourier map and refined anisotropically. The hydrogen atoms were fixed by HFIX in their ideal positions and refined using riding model with isotropic thermal parameters.

### 1. Crystal structure of 3e:

The crystal structure of **3e** has been deposited to Cambridge Crystallographic Data Centre and allotted deposition number is 2282503. Suitable single-crystals X-ray analysis were grown up from slow evaporation in CDCl<sub>3</sub> at 25 °C.

#### Crystal structure of 3e (thermal ellipsoids with 50% probability level):

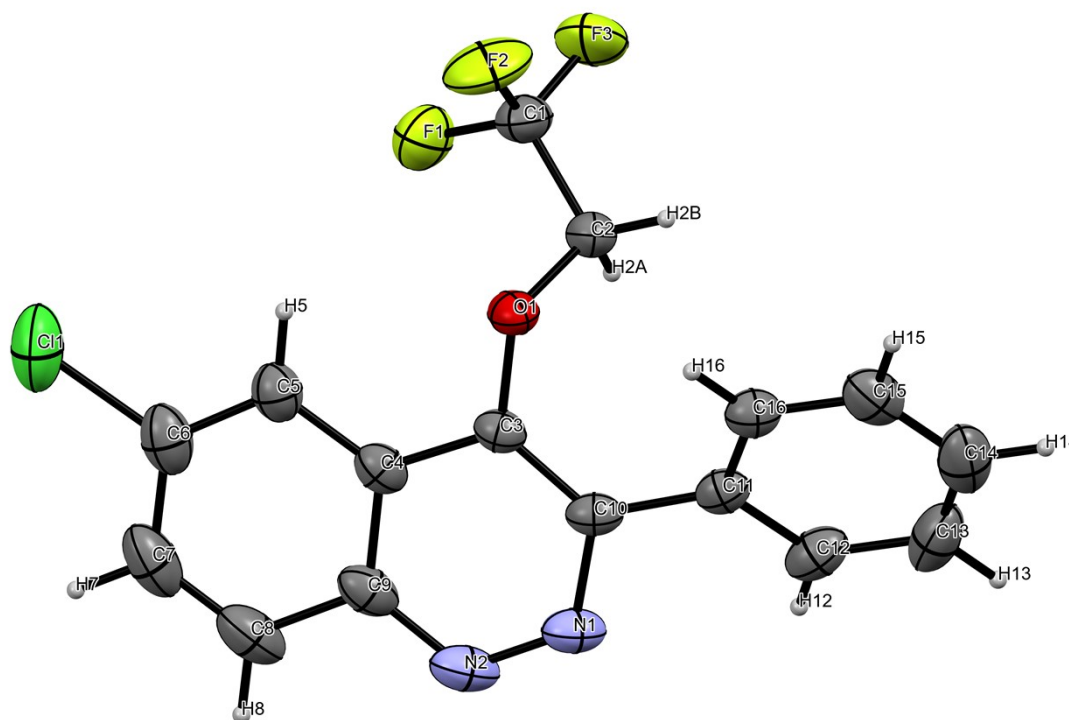

**Table 2 Crystal data and structure refinement for 3e.**

|                   |                                                                   |
|-------------------|-------------------------------------------------------------------|
| CCDC no.          | 2282503                                                           |
| Empirical formula | C <sub>16</sub> H <sub>10</sub> ClF <sub>3</sub> N <sub>2</sub> O |
| Formula weight    | 338.71                                                            |
| Temperature/K     | 298                                                               |
| Crystal system    | orthorhombic                                                      |

|                                                |                                                                  |
|------------------------------------------------|------------------------------------------------------------------|
| Space group                                    | Pbca                                                             |
| a/Å                                            | 13.347(2)                                                        |
| b/Å                                            | 7.581(2)                                                         |
| c/Å                                            | 29.868(3)                                                        |
| $\alpha/^\circ$                                | 90                                                               |
| $\beta/^\circ$                                 | 90                                                               |
| $\gamma/^\circ$                                | 90                                                               |
| Volume/Å <sup>3</sup>                          | 3022.0(10)                                                       |
| Z                                              | 8                                                                |
| $\rho_{\text{calc}}/\text{g}/\text{cm}^3$      | 1.489                                                            |
| $\mu/\text{mm}^{-1}$                           | 0.290                                                            |
| F(000)                                         | 1376.0                                                           |
| Crystal size/mm <sup>3</sup>                   | 0.321 × 0.126 × 0.056                                            |
| Radiation                                      | MoK $\alpha$ ( $\lambda = 0.71073$ )                             |
| 2 $\Theta$ range for data collection/ $^\circ$ | 6.252 to 51.442                                                  |
| Index ranges                                   | -16 ≤ h ≤ 16, -9 ≤ k ≤ 9, -36 ≤ l ≤ 36                           |
| Reflections collected                          | 60482                                                            |
| Independent reflections                        | 2863 [ $R_{\text{int}} = 0.0744$ , $R_{\text{sigma}} = 0.0258$ ] |
| Data/restraints/parameters                     | 2863/0/208                                                       |
| Goodness-of-fit on F <sup>2</sup>              | 1.063                                                            |
| Final R indexes [ $I \geq 2\sigma(I)$ ]        | $R_1 = 0.0530$ , $wR_2 = 0.1366$                                 |
| Final R indexes [all data]                     | $R_1 = 0.0641$ , $wR_2 = 0.1446$                                 |
| Largest diff. peak/hole / e Å <sup>-3</sup>    | 0.23/-0.35                                                       |

## 2. Crystal structure of **5i**:

The crystal structure of **5i** has been deposited to Cambridge Crystallographic Data Centre and allotted deposition number is 2257365. Suitable single-crystals X-ray analysis were grown up from slow evaporation in ACN:Hexane, 3:1 (v/v) at 25 °C.

**Crystal structure of **5i** (thermal ellipsoids with 50% probability level):**

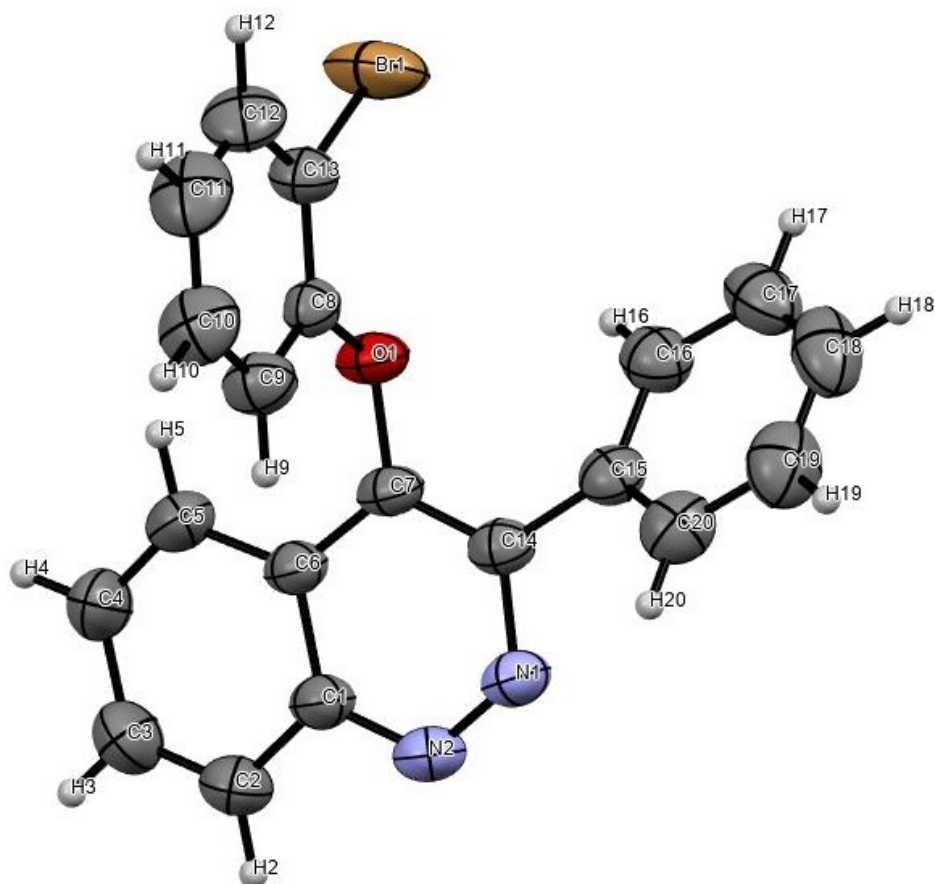

|                   |                                                    |
|-------------------|----------------------------------------------------|
| CCDC no.          | 2257365                                            |
| Empirical formula | C <sub>20</sub> H <sub>13</sub> BrN <sub>2</sub> O |
| Formula weight    | 377.23                                             |
| Temperature/K     | 298                                                |
| Crystal system    | monoclinic                                         |
| Space group       | P2 <sub>1</sub> /n                                 |
| a/Å               | 10.1714(6)                                         |
| b/Å               | 10.7451(6)                                         |
| c/Å               | 15.1448(10)                                        |
| α/°               | 90                                                 |
| β/°               | 91.646(2)                                          |
| γ/°               | 90                                                 |

|                                             |                                                                  |
|---------------------------------------------|------------------------------------------------------------------|
| Volume/Å <sup>3</sup>                       | 1654.53(17)                                                      |
| Z                                           | 4                                                                |
| $\rho_{\text{calc}}/\text{cm}^3$            | 1.514                                                            |
| $\mu/\text{mm}^{-1}$                        | 2.493                                                            |
| F(000)                                      | 760.0                                                            |
| Crystal size/mm <sup>3</sup>                | 0.235 × 0.123 × 0.056                                            |
| Radiation                                   | MoK $\alpha$ ( $\lambda = 0.71073$ )                             |
| 2 $\Theta$ range for data collection/°      | 4.648 to 52.814                                                  |
| Index ranges                                | -12 ≤ h ≤ 11, -13 ≤ k ≤ 13, -18 ≤ l ≤ 15                         |
| Reflections collected                       | 10102                                                            |
| Independent reflections                     | 3388 [ $R_{\text{int}} = 0.0414$ , $R_{\text{sigma}} = 0.0482$ ] |
| Data/restraints/parameters                  | 3388/0/217                                                       |
| Goodness-of-fit on F <sup>2</sup>           | 1.015                                                            |
| Final R indexes [ $I \geq 2\sigma(I)$ ]     | $R_1 = 0.0454$ , $wR_2 = 0.0990$                                 |
| Final R indexes [all data]                  | $R_1 = 0.0791$ , $wR_2 = 0.1126$                                 |
| Largest diff. peak/hole / e Å <sup>-3</sup> | 0.48/-0.59                                                       |

### 3. Crystal structure of 6f:

The crystal structure of **6f** has been deposited to Cambridge Crystallographic Data Centre and allotted deposition number is 2282504. Suitable single-crystals X-ray analysis were grown up from slow evaporation in MeOH:DCM, 3:1 (v/v) at 25 °C.

#### Crystal structure of 6f (thermal ellipsoids with 50% probability level):

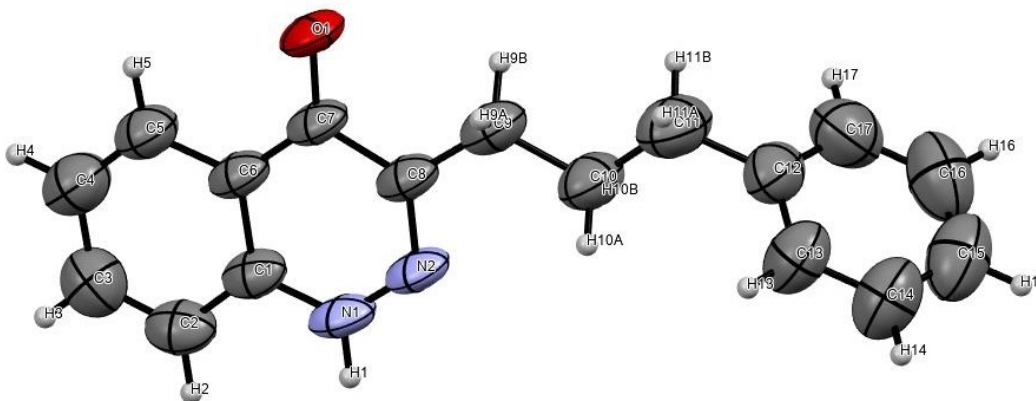

**Table 4 Crystal data and structure refinement for 6f.**

|                                    |                                                               |
|------------------------------------|---------------------------------------------------------------|
| CCDC no.                           | 2282504                                                       |
| Empirical formula                  | C <sub>17</sub> H <sub>16</sub> N <sub>2</sub> O              |
| Formula weight                     | 264.32                                                        |
| Temperature/K                      | 298                                                           |
| Crystal system                     | Orthorhombic                                                  |
| Space group                        | Pbca                                                          |
| a/Å                                | 12.7391(7)                                                    |
| b/Å                                | 9.0644(5)                                                     |
| c/Å                                | 24.8179(14)                                                   |
| α/°                                | 90                                                            |
| β/°                                | 90                                                            |
| γ/°                                | 90                                                            |
| Volume/Å <sup>3</sup>              | 2865.8(3)                                                     |
| Z                                  | 8                                                             |
| ρ <sub>calc</sub> /cm <sup>3</sup> | 1.225                                                         |
| μ/mm <sup>-1</sup>                 | 0.077                                                         |
| F(000)                             | 1120.0                                                        |
| Crystal size/mm <sup>3</sup>       | 0.231 × 0.156 × 0.023                                         |
| Radiation                          | MoKα (λ = 0.71073)                                            |
| 2θ range for data collection/°     | 4.582 to 51.42                                                |
| Index ranges                       | -15 ≤ h ≤ 14, -11 ≤ k ≤ 11, -30 ≤ l ≤ 30                      |
| Reflections collected              | 27514                                                         |
| Independent reflections            | 2716 [R <sub>int</sub> = 0.0979, R <sub>sigma</sub> = 0.0473] |
| Data/restraints/parameters         | 2716/0/181                                                    |

|                                                |                                  |
|------------------------------------------------|----------------------------------|
| Goodness-of-fit on $F^2$                       | 1.097                            |
| Final R indexes [ $I > 2\sigma(I)$ ]           | $R_1 = 0.0924$ , $wR_2 = 0.2234$ |
| Final R indexes [all data]                     | $R_1 = 0.1315$ , $wR_2 = 0.2452$ |
| Largest diff. peak/hole / $e \text{ \AA}^{-3}$ | 0.36/-0.20                       |



#### 4. Crystal structure of 7b:

The crystal structure of **7b** has been deposited to Cambridge Crystallographic Data Centre and allotted deposition number is 2270376. Suitable single-crystals X-ray analysis were grown up from slow evaporation in MeOH:DCM, 3:1 (v/v) at 25 °C.

#### Crystal structure of 7b (thermal ellipsoids with 50% probability level):

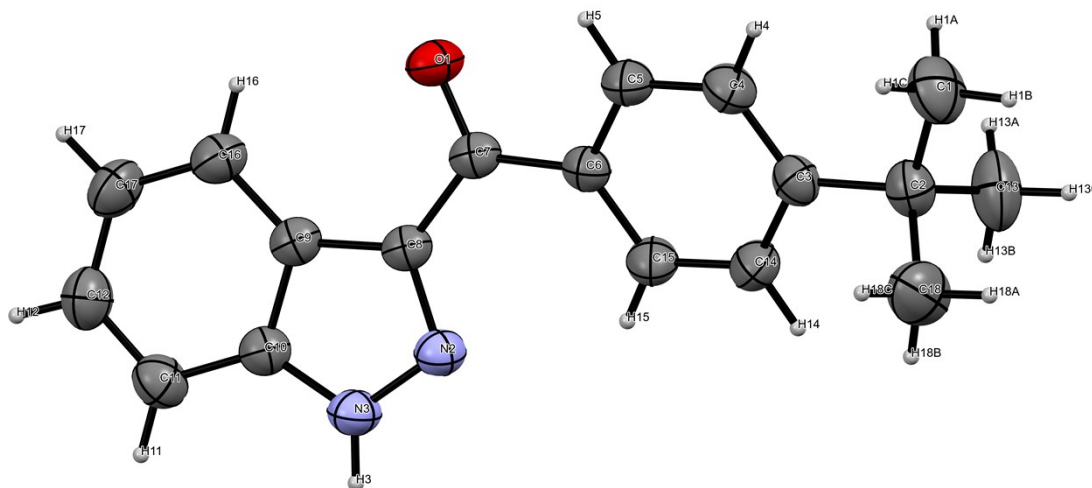

| <b>Table 5 Crystal data and structure refinement for 7b.</b> |                                                               |
|--------------------------------------------------------------|---------------------------------------------------------------|
| CCDC no.                                                     | 2270376                                                       |
| Empirical formula                                            | C <sub>18</sub> H <sub>18</sub> N <sub>2</sub> O              |
| Formula weight                                               | 278.34                                                        |
| Temperature/K                                                | 298                                                           |
| Crystal system                                               | monoclinic                                                    |
| Space group                                                  | P2 <sub>1</sub> /c                                            |
| a/Å                                                          | 15.7784(19)                                                   |
| b/Å                                                          | 7.2071(9)                                                     |
| c/Å                                                          | 13.3839(14)                                                   |
| α/°                                                          | 90                                                            |
| β/°                                                          | 97.417(3)                                                     |
| γ/°                                                          | 90                                                            |
| Volume/Å <sup>3</sup>                                        | 1509.2(3)                                                     |
| Z                                                            | 4                                                             |
| ρ <sub>calc</sub> /g/cm <sup>3</sup>                         | 1.225                                                         |
| μ/mm <sup>-1</sup>                                           | 0.077                                                         |
| F(000)                                                       | 592.0                                                         |
| Crystal size/mm <sup>3</sup>                                 | 0.356 × 0.125 × 0.056                                         |
| Radiation                                                    | MoKα (λ = 0.71073)                                            |
| 2θ range for data collection/°                               | 5.208 to 52.752                                               |
| Index ranges                                                 | -19 ≤ h ≤ 19, -9 ≤ k ≤ 9, -16 ≤ l ≤ 14                        |
| Reflections collected                                        | 15953                                                         |
| Independent reflections                                      | 3067 [R <sub>int</sub> = 0.0438, R <sub>sigma</sub> = 0.0333] |

|                                                |                                  |
|------------------------------------------------|----------------------------------|
| Data/restraints/parameters                     | 3067/0/193                       |
| Goodness-of-fit on $F^2$                       | 1.122                            |
| Final R indexes [ $I \geq 2\sigma(I)$ ]        | $R_1 = 0.0611$ , $wR_2 = 0.1422$ |
| Final R indexes [all data]                     | $R_1 = 0.0789$ , $wR_2 = 0.1519$ |
| Largest diff. peak/hole / $e \text{ \AA}^{-3}$ | 0.15/-0.13                       |

## 5 Crystal structure of 12b:

The crystal structure of **12b** has been deposited to Cambridge Crystallographic Data Centre and allotted deposition number is 2282505. Suitable single-crystals X-ray analysis were grown up from slow evaporation in MeOH:DCM, 3:1 (v/v) at 25 °C.

### Crystal structure of 12b (thermal ellipsoids with 50% probability level):

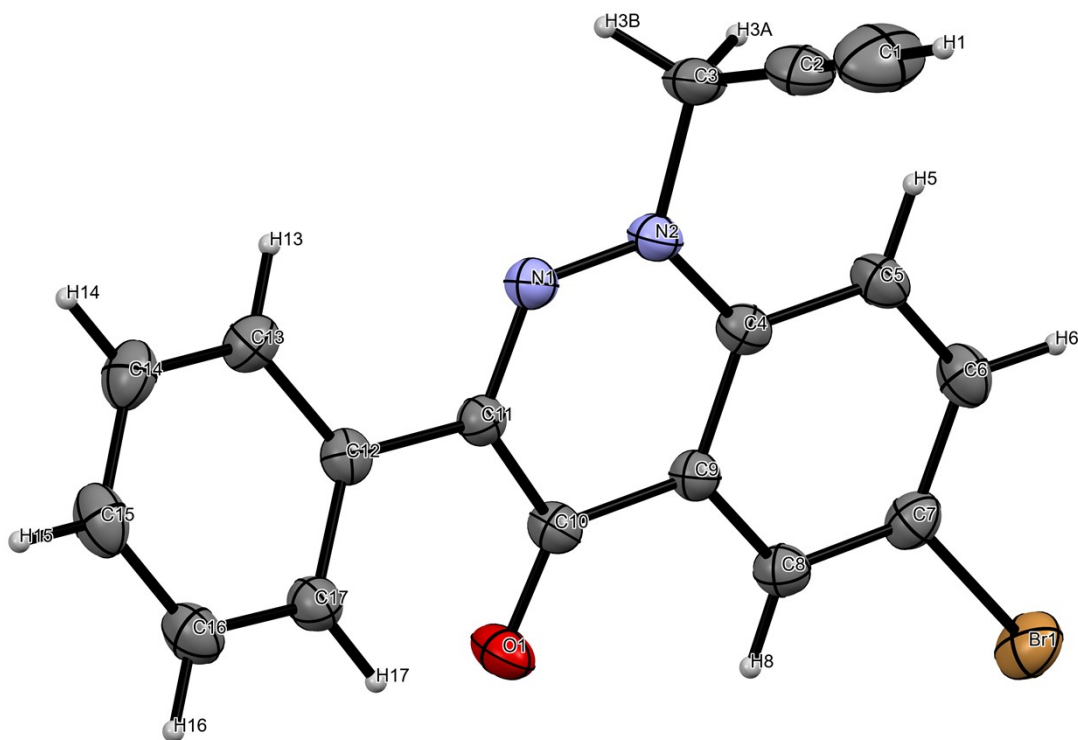

|                                      |                                                    |
|--------------------------------------|----------------------------------------------------|
| CCDC no.                             | 2282505                                            |
| Empirical formula                    | C <sub>17</sub> H <sub>11</sub> BrN <sub>2</sub> O |
| Formula weight                       | 339.19                                             |
| Temperature/K                        | 298                                                |
| Crystal system                       | monoclinic                                         |
| Space group                          | P2 <sub>1</sub> /n                                 |
| a/Å                                  | 5.1247(5)                                          |
| b/Å                                  | 13.5141(15)                                        |
| c/Å                                  | 20.781(2)                                          |
| α/°                                  | 90                                                 |
| β/°                                  | 94.934(5)                                          |
| γ/°                                  | 90                                                 |
| Volume/Å <sup>3</sup>                | 1433.8(3)                                          |
| Z                                    | 4                                                  |
| ρ <sub>calc</sub> /g/cm <sup>3</sup> | 1.571                                              |
| μ/mm <sup>-1</sup>                   | 2.866                                              |

|                                                  |                                                                      |
|--------------------------------------------------|----------------------------------------------------------------------|
| F(000)                                           | 680.0                                                                |
| Crystal size/mm <sup>3</sup>                     | 0.258 × 0.231 × 0.137                                                |
| Radiation                                        | MoK $\alpha$ ( $\lambda = 0.71073$ )                                 |
| 2 $\Theta$ range for data collection/ $^{\circ}$ | 4.956 to 56.67                                                       |
| Index ranges                                     | -6 $\leq$ h $\leq$ 6, -17 $\leq$ k $\leq$ 18, -27 $\leq$ l $\leq$ 22 |
| Reflections collected                            | 12448                                                                |
| Independent reflections                          | 3463 [R <sub>int</sub> = 0.0547, R <sub>sigma</sub> = 0.0495]        |
| Data/restraints/parameters                       | 3463/0/190                                                           |
| Goodness-of-fit on F <sup>2</sup>                | 1.029                                                                |
| Final R indexes [I $\geq$ 2 $\sigma$ (I)]        | R <sub>1</sub> = 0.0440, wR <sub>2</sub> = 0.1072                    |
| Final R indexes [all data]                       | R <sub>1</sub> = 0.0626, wR <sub>2</sub> = 0.1172                    |
| Largest diff. peak/hole / e $\text{\AA}^{-3}$    | 0.55/-0.85                                                           |

## **6. References:**

- 1 M. Kumar and A. Goswami, *Org. Lett.*, 2023, **25**, 3254–3259.
- 2 Bruker, SAINT V7.68A, Bruker AXS Inc., Madison (WI, USA), 2005.
- 3 G. M. Sheldrick, SADABS 2008/2, Göttingen, 2008.
- 4 A. Altomare, G. Cascarano, C. Giacovazzo and A. Guagliardi, *J. Appl. Cryst.*, 1993, **26**, 343–350.
- 5 G. M. Sheldrick, SHELXL-97, Program for Crystal Structure Solution and Refinement; University of Göttingen, Göttingen, 43, Germany, 1997.
- 6 L. Farrugia, WinGX-A Windows Program for Crystal Structure Analysis, *J. Appl. Cryst.* 1999, **32**, 837–838.
